# Supplementary material for: Comparison of multiple glacier inventories with a new inventory derived from high-resolution ALOS imagery in the Bhutan Himalaya
Source: Copernicus journal article supplement (doi:10.5194/tc-10-65-2016), 2016-01-18
Supplement: Supplementary file 1 [file sup2.xlsx]

## Sheet: ALOS
ID	PRISM Scene ID	PRISM Date	AVNIR-2 Scene ID	AVNIR-2 Date	Glacier Area (km2)	Debris-covered Area (km2)	Max. Elv. (m a.s.l.)	Min. Elv. (m a.s.l.)	Mean Elv. (m a.s.l.)	Median Elv. (m a.s.l.)	River Basin	Slope Gradient (º)	Upper Slope Gradient (º)	Lower Slope Gradient (º)	Aspect (º)
alos10001	ALPSMN254853045	2010-11-06	ALAV2A261563040	2010-12-22	0.06997	0	5351	5060	5253.62	5259	Amo	34.7652	27.8374	38.0241	323.857
alos10002	ALPSMN254853045	2010-11-06	ALAV2A261563040	2010-12-22	0.0593929	0	5503	5323	5415.24	5420	Amo	25.8958	26.3062	25.6442	346.198
alos10003	ALPSMN254853045	2010-11-06	ALAV2A261563040	2010-12-22	0.0538475	0	5603	5370	5511.54	5517	Amo	41.8612	28.054	49.5472	299.095
alos10004	ALPSMN254853045	2010-11-06	ALAV2A261563040	2010-12-22	0.0464378	0	5611	5371	5508.24	5525	Amo	45.7917	32.7706	55.9861	344.557
alos10005	ALPSMN254853045	2010-11-06	ALAV2A261563040	2010-12-22	0.196892	0	5408	4933	5185.62	5215	Wang	31.4881	34.9479	27.9009	342.489
alos10006	ALPSMN254853040	2010-11-06	ALAV2A261563040	2010-12-22	0.131658	0	5683	5186	5380.56	5363	Amo	39.0451	41.6108	36.3585	322.034
alos10007	ALPSMN254853040	2010-11-06	ALAV2A261563040	2010-12-22	0.342644	0	5771	5257	5478.83	5430	Wang	27.0009	32.4456	22.3089	248.971
alos10008	ALPSMN254853040	2010-11-06	ALAV2A261563040	2010-12-22	0.14525	0.0970539	5471	5210	5293.72	5280	Amo	27.4977	37.737	18.7953	302.053
alos10009	ALPSMN254853040	2010-11-06	ALAV2A261563040	2010-12-22	0.0103291	0	5728	5645	5680.55	5671	Wang	36.9102	30.3356	36.9144	174.765
alos10010	ALPSMN254853040	2010-11-06	ALAV2A261563040	2010-12-22	0.0238426	0	5425	5326	5376.83	5374	Amo	37.3266	43.1086	36.2865	249.469
alos10011	ALPSMN254853040	2010-11-06	ALAV2A261563040	2010-12-22	0.254786	0	5824	5315	5595.84	5616	Amo	25.2079	21.0474	29.8567	228.037
alos10012	ALPSMN254853040	2010-11-06	ALAV2A261563040	2010-12-22	0.0449967	0	5442	5171	5346.69	5369	Wang	31.7528	22.6208	37.7403	215.134
alos10013	ALPSMN254853040	2010-11-06	ALAV2A261563040	2010-12-22	2.18923	0	5969	4832	5419.01	5413	Wang	22.6513	23.7108	21.5399	112.338
alos10014	ALPSMN254853040	2010-11-06	ALAV2A261563040	2010-12-22	1.2888	0.975765	7087	5340	5610.76	5517	Nianchu	19.7758	25.5912	13.9091	276.574
alos10015	ALPSMN254853040	2010-11-06	ALAV2A261563040	2010-12-22	0.131844	0	5446	5261	5377.87	5382	Wang	27.3429	25.2678	28.8047	195.584
alos10016	ALPSMN254853040	2010-11-06	ALAV2A261563040	2010-12-22	0.0291614	0	5346	5263	5313.06	5312	Wang	24.7916	19.6895	27.1922	254.586
alos10017	ALPSMN254853040	2010-11-06	ALAV2A261563040	2010-12-22	2.29742	0.282617	6247	5322	5654.93	5613	Amo	22.8035	28.4065	17.1481	296.444
alos10018	ALPSMN254853040	2010-11-06	ALAV2A261563040	2010-12-22	0.260398	0	5613	5186	5391.21	5370	Wang	32.204	35.5387	29.0732	138.551
alos10019	ALPSMN254853040	2010-11-06	ALAV2A261563040	2010-12-22	0.405554	0.175749	7051	5505	6000.51	5600	Nianchu	25.9365	40.5981	12.6336	291.226
alos10020	ALPSMN254853040	2010-11-06	ALAV2A261563040	2010-12-22	0.590656	0	6045	5092	5453.88	5379	Wang	30.8765	36.1452	26.081	166.061
alos10021	ALPSMN254853040	2010-11-06	ALAV2A261563040	2010-12-22	0.67053	0.0916563	6270	5228	5633.65	5612	Nianchu	31.2043	37.254	24.8596	16.7244
alos10022	ALPSMN254853040	2010-11-06	ALAV2A261563040	2010-12-22	1.45437	0.0360095	6878	4823	5746.92	5695	Wang	33.6866	34.8996	32.1939	184.29
alos10023	ALPSMN254853040	2010-11-06	ALAV2A261563040	2010-12-22	0.340751	0	6101	5108	5549.99	5464	Wang	33.0988	34.9867	30.4282	209.886
alos10024	ALPSMN254853040	2010-11-06	ALAV2A261563040	2010-12-22	0.801248	0.0313726	5911	5204	5528.09	5524	Nianchu	33.2007	34.1406	32.241	314.162
alos10025	ALPSMN254853040	2010-11-06	ALAV2A261563040	2010-12-22	1.07108	0.0877724	6082	4888	5540.25	5581	Wang	28.5606	27.3665	29.6414	207.434
alos10026	ALPSMN254853040	2010-11-06	ALAV2A261563040	2010-12-22	0.274282	0	5576	5042	5407.82	5402	Wang	26.8906	23.6682	28.802	250.075
alos10027	ALPSMN254853040	2010-11-06	ALAV2A261563040	2010-12-22	0.227909	0	5581	5250	5399.44	5414	Wang	22.2606	19.1823	26.4816	234.105
alos10028	ALPSMN254853040	2010-11-06	ALAV2A261563040	2010-12-22	0.141716	0	5456	5196	5345.18	5369	Wang	31.1313	27.2961	35.3686	139.487
alos10029	ALPSMN254853040	2010-11-06	ALAV2A261563040	2010-12-22	0.0248142	0	5291	5191	5217.23	5210	Wang	18.0867	21.3233	12.6515	18.97
alos10030	ALPSMN254853040	2010-11-06	ALAV2A261563040	2010-12-22	0.617176	0	5630	5084	5429.36	5469	Wang	22.8316	17.1705	27.6862	173.844
alos10031	ALPSMN254853040	2010-11-06	ALAV2A261563040	2010-12-22	1.11433	0.108843	6632	5292	5680.58	5557	Nianchu	24.8094	34.1269	15.4244	340.38
alos10032	ALPSMN254853040	2010-11-06	ALAV2A261563040	2010-12-22	6.0853	0.779706	7310	4409	5508.73	5387	Wang	31.189	35.6149	27.1181	132.371
alos10033	ALPSMN254853040	2010-11-06	ALAV2A261563040	2010-12-22	0.305658	0	5548	5064	5349.28	5371	Wang	29.6674	24.1678	33.7681	64.669
alos10034	ALPSMN254853040	2010-11-06	ALAV2A261563040	2010-12-22	0.445771	0	5601	5183	5397.12	5390	Wang	24.7549	22.6815	26.8344	147.248
alos10035	ALPSMN254853040	2010-11-06	ALAV2A261563040	2010-12-22	0.468956	0	5864	5284	5570.26	5573	Nianchu	28.1791	29.9171	27.091	352.333
alos10036	ALPSMN254853040	2010-11-06	ALAV2A261563040	2010-12-22	0.325868	0.0438351	5568	5103	5348.48	5358	Nianchu	24.8071	26.1803	22.7245	22.204
alos10037	ALPSMN254853040	2010-11-06	ALAV2A261563040	2010-12-22	1.52584	0.0827144	6264	5026	5477.26	5426	Nianchu	23.4831	28.7795	17.9687	345.026
alos10038	ALPSMN254853040	2010-11-06	ALAV2A261563040	2010-12-22	6.35377	4.77326	6115	4353	4877.33	4772	Wang	19.9019	27.7342	12.0645	150.174
alos10039	ALPSMN254853040	2010-11-06	ALAV2A261563040	2010-12-22	0.771044	0.0378042	6230	5232	5654.38	5588	Nianchu	29.529	34.7927	23.8198	330.716
alos10040	ALPSMN254853040	2010-11-06	ALAV2A261563040	2010-12-22	0.061238	0	5949	5323	5609.06	5579	Wang	51.1558	55.7543	47.2239	161.489
alos10041	ALPSMN254853040	2010-11-06	ALAV2A261563040	2010-12-22	0.640741	0	6213	5215	5667.91	5622	Nianchu	31.157	35.97	26.1946	332.043
alos10042	ALPSMN254853040	2010-11-06	ALAV2A261563040	2010-12-22	0.370982	0	6141	5354	5669.39	5643	Nianchu	29.7493	34.7267	23.9576	339.807
alos10043	ALPSMN254853040	2010-11-06	ALAV2A261563040	2010-12-22	0.480642	0	6087	5221	5646.78	5641	Nianchu	29.7274	27.9952	31.2647	356.256
alos10044	ALPSMN254853040	2010-11-06	ALAV2A261563040	2010-12-22	1.23615	0	6596	5222	5799.3	5772	Wang	36.4436	40.654	32.6347	145.3
alos10045	ALPSMN254853040	2010-11-06	ALAV2A261563040	2010-12-22	0.776741	0	6054	5089	5625.91	5643	Nianchu	30.021	30.4205	29.6313	12.8841
alos10046	ALPSMN254853040	2010-11-06	ALAV2A261563040	2010-12-22	0.621051	0	5908	5047	5481.04	5466	Nianchu	30.1872	32.3398	27.4577	2.9742
alos10047	ALPSMN254853040	2010-11-06	ALAV2A261563040	2010-12-22	1.60894	0	5819	4757	5351.25	5388	Mo	26.0562	21.9282	29.7135	119.501
alos10048	ALPSMN254853040	2010-11-06	ALAV2A261563040	2010-12-22	0.325788	0	5775	5161	5462.38	5447	Nianchu	32.1609	32.9535	30.4572	358.262
alos10049	ALPSMN207883045	2009-12-19	ALAV2A261563040	2010-12-22	0.313667	0	5549	5028	5283.04	5300	Wang	30.853	25.8428	35.5223	325.244
alos10050	ALPSMN207883045	2009-12-19	ALAV2A261563040	2010-12-22	0.0571305	0	5362	5137	5250.43	5254	Wang	43.006	43.3177	42.5468	21.285
alos10051	ALPSMN254853040	2010-11-06	ALAV2A261563040	2010-12-22	0.135903	0	5493	5163	5346.21	5347	Nianchu	33.1843	33.0015	35.7583	308.252
alos10052	ALPSMN254853040	2010-11-06	ALAV2A261563040	2010-12-22	3.76932	1.1989	6498	4200	4962.06	5118	Mo	19.3776	22.5265	15.8088	115.336
alos10053	ALPSMN254853040	2010-11-06	ALAV2A261563040	2010-12-22	1.24597	0	6479	5198	5744.48	5675	Nianchu	38.3381	40.6756	36.244	339.855
alos10054	ALPSMN254853040	2010-11-06	ALAV2A261563040	2010-12-22	0.0763346	0	5691	5265	5497.4	5508	Nianchu	42.5028	41.9908	43.7902	317.761
alos10055	ALPSMN207883040	2009-12-19	ALAV2A261563040	2010-12-22	0.929905	0	5543	4693	5256.79	5327	Mo	26.4916	20.0503	32.5071	100.45
alos10056	ALPSMN254853040	2010-11-06	ALAV2A261563040	2010-12-22	0.380801	0	5776	5141	5494.04	5508	Nianchu	35.4223	34.2896	35.736	321.503
alos10057	ALPSMN254853040	2010-11-06	ALAV2A261563040	2010-12-22	0.0502962	0	5642	5480	5547.04	5533	Mo	32.9462	41.7476	28.0036	15.3711
alos10058	ALPSMN207883040	2009-12-19	ALAV2A261563040	2010-12-22	0.266811	0.189906	4788	4377	4619.62	4642	Mo	27.933	23.132	30.5464	100.631
alos10059	ALPSMN207883040	2009-12-19	ALAV2A261563040	2010-12-22	1.70424	0	5661	4928	5310.63	5316	Mo	22.2088	20.368	23.7396	27.4507
alos10060	ALPSMN207883040	2009-12-19	ALAV2A261563040	2010-12-22	0.127888	0	5532	5209	5398.04	5434	Mo	28.198	23.4955	32.1358	122.574
alos10061	ALPSMN207883045	2009-12-19	ALAV2A261563040	2010-12-22	0.108037	0	5149	5024	5095.68	5099	Wang	19.6797	17.9326	19.514	338.891
alos10062	ALPSMN207883040	2009-12-19	ALAV2A261563040	2010-12-22	0.151502	0	5349	5005	5119.91	5083	Wang	22.9657	30.6651	14.9434	320.187
alos10063	ALPSMN207883040	2009-12-19	ALAV2A261563040	2010-12-22	0.0773431	0	5400	5055	5276.7	5334	Wang	31.6961	22.4269	39.6328	304.128
alos10064	ALPSMN207883040	2009-12-19	ALAV2A261563040	2010-12-22	0.446445	0	5550	5041	5271.6	5265	Wang	26.936	32.1238	20.9647	284.649
alos10065	ALPSMN207883040	2009-12-19	ALAV2A261563040	2010-12-22	0.136513	0	5311	5081	5208.12	5227	Wang	19.916	16.6415	23.439	299.876
alos10066	ALPSMN207883040	2009-12-19	ALAV2A261563040	2010-12-22	0.182715	0	5650	5399	5540.15	5561	Wang	25.0468	21.0416	29.5444	325.877
alos10067	ALPSMN207883040	2009-12-19	ALAV2A261563040	2010-12-22	0.640095	0	5315	5002	5175.6	5183	Wang	18.5921	15.4964	21.4129	40.3573
alos10068	ALPSMN207883040	2009-12-19	ALAV2A261563040	2010-12-22	0.733237	0	5311	5058	5164.66	5161	Wang	14.8802	15.8982	13.6295	56.7699
alos10069	ALPSMN207883045	2009-12-19	ALAV2A261563040	2010-12-22	0.463595	0	5588	5014	5324.34	5341	Wang	28.3482	30.5691	26.0815	316.217
alos10070	ALPSMN207883045	2009-12-19	ALAV2A261563040	2010-12-22	0.189517	0	5425	5015	5176.67	5146	Wang	28.0914	34.7449	20.6206	321.85
alos10071	ALPSMN207883040	2009-12-19	ALAV2A261563040	2010-12-22	1.36528	0	5444	5098	5270.14	5265	Wang	12.7124	12.6574	12.6696	95.143
alos10072	ALPSMN207883045	2009-12-19	ALAV2A261563040	2010-12-22	0.0329008	0	5517	5334	5429.19	5428	Wang	35.9177	34.9106	37.3125	65.6665
alos10073	ALPSMN207883045	2009-12-19	ALAV2A261563040	2010-12-22	0.755582	0	5554	4926	5244.03	5228	Wang	21.0563	22.5275	19.2129	55.9571
alos10074	ALPSMN261563035	2010-12-22	ALAV2A261563030	2010-12-22	0.210903	0	5655	5280	5524.36	5544	Nianchu	29.4505	27.8831	32.2574	334.519
alos10075	ALPSMN261563035	2010-12-22	ALAV2A261563030	2010-12-22	0.04763	0	5549	5416	5482.71	5478	Mo	32.0803	31.4547	31.3572	148.743
alos10076	ALPSMN261563035	2010-12-22	ALAV2A261563030	2010-12-22	0.437817	0	5552	5266	5417.1	5418	Nianchu	27.8925	26.3576	30.3831	321.818
alos10077	ALPSMN261563035	2010-12-22	ALAV2A261563030	2010-12-22	0.0700668	0	5702	5493	5618.01	5620	Nianchu	31.9235	31.5212	31.8708	357.707
alos10078	ALPSMN261563035	2010-12-22	ALAV2A261563030	2010-12-22	0.0156149	0	5413	5365	5393.5	5396	Nianchu	21.6905	13.2809	32.3124	187.931
alos10079	ALPSMN261563035	2010-12-22	ALAV2A261563030	2010-12-22	0.0461707	0	5613	5485	5548.98	5553	Nianchu	34.2896	35.7303	34.1524	127.165
alos10080	ALPSMN261563035	2010-12-22	ALAV2A261563030	2010-12-22	0.0806401	0	6007	5582	5782.64	5765	Nianchu	36.2286	42.1131	29.756	304.855
alos10081	ALPSMN261563035	2010-12-22	ALAV2A261563030	2010-12-22	0.0117532	0	5986	5899	5953.15	5957	Nianchu	28.1813	17.8474	38.3415	216.393
alos10082	ALPSMN261563035	2010-12-22	ALAV2A261563030	2010-12-22	0.0284577	0	6009	5819	5952.77	5967	Nianchu	34.3213	21.8032	49.1399	277.978
alos10083	ALPSMN261563035	2010-12-22	ALAV2A261563030	2010-12-22	0.481342	0	5740	5144	5419.42	5403	Nianchu	25.6304	27.8959	22.5886	293.359
alos10084	ALPSMN261563035	2010-12-22	ALAV2A261563030	2010-12-22	0.027024	0	5983	5847	5925.2	5932	Nianchu	31.7023	28.9481	33.4106	148.599
alos10085	ALPSMN261563035	2010-12-22	ALAV2A261563030	2010-12-22	0.765012	0	5740	5066	5397.44	5402	Mo	26.2301	28.7909	23.3289	206.662
alos10086	ALPSMN261563035	2010-12-22	ALAV2A261563030	2010-12-22	0.485772	0	5636	5090	5443.16	5497	Nianchu	27.2591	24.7422	28.9102	309.449
alos10087	ALPSMN261563035	2010-12-22	ALAV2A261563030	2010-12-22	0.159459	0	5649	5441	5526.98	5529	Mo	27.6714	27.611	26.9327	125.848
alos10088	ALPSMN261563035	2010-12-22	ALAV2A261563030	2010-12-22	0.67469	0.0548503	5689	5130	5456.22	5469	Nianchu	28.7886	30.4782	25.9268	278.546
alos10089	ALPSMN261563035	2010-12-22	ALAV2A261563030	2010-12-22	0.240621	0	5638	5127	5395.35	5394	Nianchu	36.0253	38.7897	32.5159	355.823
alos10090	ALPSMN261563035	2010-12-22	ALAV2A261563030	2010-12-22	0.144879	0	5444	5006	5322.45	5352	Mo	31.3451	26.077	36.2371	51.1628
alos10091	ALPSMN261563035	2010-12-22	ALAV2A261563030	2010-12-22	0.144528	0	5570	5174	5396.8	5411	Nianchu	37.3939	34.3752	37.9274	326.564
alos10092	ALPSMN261563035	2010-12-22	ALAV2A261563030	2010-12-22	0.482682	0	5679	5188	5410.17	5393	Mo	24.026	27.0174	20.9068	126.785
alos10093	ALPSMN261563035	2010-12-22	ALAV2A261563030	2010-12-22	0.0330947	0	5474	5377	5446.16	5452	Nianchu	27.2648	16.6158	42.4529	4.30621
alos10094	ALPSMN261563035	2010-12-22	ALAV2A261563030	2010-12-22	0.0260195	0	5432	5276	5364	5375	Nianchu	35.7402	25.6237	46.2433	348.076
alos10095	ALPSMN261563035	2010-12-22	ALAV2A261563030	2010-12-22	0.220059	0	5334	5076	5194.92	5196	Mo	25.1324	24.8988	24.9664	49.1973
alos10096	ALPSMN261563035	2010-12-22	ALAV2A261563030	2010-12-22	0.208919	0	5569	5218	5447.52	5466	Nianchu	24.4263	22.7886	27.0082	258.209
alos10097	ALPSMN261563035	2010-12-22	ALAV2A261563030	2010-12-22	0.142035	0	5260	5145	5214.95	5222	Mo	14.6395	12.146	18.3213	72.9481
alos10098	ALPSMN261563035	2010-12-22	ALAV2A261563030	2010-12-22	0.0141532	0	5801	5666	5764.56	5777	Nianchu	32.8914	21.1308	43.9621	199.948
alos10099	ALPSMN207883040	2009-12-19	ALAV2A261563040	2010-12-22	0.232006	0	5337	5144	5254.99	5258	Mo	21.5812	18.6444	24.7941	340.749
alos10100	ALPSMN261563035	2010-12-22	ALAV2A261563030	2010-12-22	0.123134	0	5302	5101	5209.73	5216	Mo	20.9639	18.2614	23.695	64.5064
alos10101	ALPSMN261563035	2010-12-22	ALAV2A261563030	2010-12-22	0.209511	0	5744	5246	5506.02	5500	Mo	30.6526	33.6456	27.0092	142.042
alos10102	ALPSMN261563035	2010-12-22	ALAV2A261563030	2010-12-22	1.8366	0	5587	5100	5383.14	5398	Nianchu	20.402	20.7175	19.8743	323.404
alos10103	ALPSMN261563035	2010-12-22	ALAV2A261563030	2010-12-22	0.0435656	0	5706	5390	5534.26	5512	Mo	41.6458	43.8515	39.086	115.402
alos10104	ALPSMN207883040	2009-12-19	ALAV2A261563040	2010-12-22	0.0353634	0	5245	5145	5194.83	5196	Mo	32.4152	33.107	30.7832	352.421
alos10105	ALPSMN261563035	2010-12-22	ALAV2A261563030	2010-12-22	0.061204	0	5321	5218	5270.32	5272	Mo	20.889	20.2704	22.9355	78.9028
alos10106	ALPSMN261563035	2010-12-22	ALAV2A261563030	2010-12-22	0.0240902	0	5463	5407	5435.48	5433	Mo	19.4645	21.0699	19.1891	108.791
alos10107	ALPSMN261563035	2010-12-22	ALAV2A261563030	2010-12-22	0.705573	0	5697	5283	5447.34	5440	Nianchu	23.4955	25.8927	21.6989	303.31
alos10108	ALPSMN261563035	2010-12-22	ALAV2A261563030	2010-12-22	0.889548	0	6206	5325	5688.7	5608	Nianchu	26.1244	31.2848	20.7095	320.466
alos10109	ALPSMN261563035	2010-12-22	ALAV2A261563030	2010-12-22	0.591212	0	6073	5268	5559.81	5525	Nianchu	26.483	29.2446	23.1744	264.194
alos10110	ALPSMN261563035	2010-12-22	ALAV2A261563030	2010-12-22	0.533181	0	5594	5083	5374.77	5393	Mo	24.3747	21.222	28.5752	169.827
alos10111	ALPSMN261563035	2010-12-22	ALAV2A261563030	2010-12-22	1.23785	0.934565	5744	4551	5035.55	4981	Mo	25.003	29.5102	20.5316	218.609
alos10112	ALPSMN207883040	2009-12-19	ALAV2A261563040	2010-12-22	0.0362342	0	5322	5207	5265.15	5267	Wang	26.8256	23.3961	31.5178	296.742
alos10113	ALPSMN261563035	2010-12-22	ALAV2A261563030	2010-12-22	5.90114	0	6644	5273	5925.59	5905	Nianchu	24.2211	28.3737	19.8315	333.622
alos10114	ALPSMN207883040	2009-12-19	ALAV2A261563040	2010-12-22	0.0348987	0	5319	5211	5280.67	5286	Wang	19.5968	16.0081	25.8801	11.6402
alos10115	ALPSMN207883040	2009-12-19	ALAV2A261563040	2010-12-22	0.124245	0	5398	5233	5318.85	5316	Wang	22.6791	20.6661	26.106	278.885
alos10116	ALPSMN207883040	2009-12-19	ALAV2A261563040	2010-12-22	0.145559	0	5382	5137	5251.21	5244	Mo	19.2756	19.5642	19.468	5.89934
alos10117	ALPSMN261563035	2010-12-22	ALAV2A261563030	2010-12-22	0.0225068	0	5269	5160	5210.08	5203	Mo	23.2339	26.6517	21.7162	130.277
alos10118	ALPSMN261563035	2010-12-22	ALAV2A261563030	2010-12-22	0.429075	0	5322	5173	5239.05	5240	Mo	18.3552	17.539	19.5746	283.746
alos10119	ALPSMN261563035	2010-12-22	ALAV2A261563030	2010-12-22	0.0267649	0	5484	5372	5435.67	5438	Mo	30.3243	28.2273	27.2376	139.966
alos10120	ALPSMN207883040	2009-12-19	ALAV2A261563040	2010-12-22	0.0920912	0	5264	5150	5208.45	5206	Mo	17.8804	19.7043	18.4693	338.192
alos10121	ALPSMN207883040	2009-12-19	ALAV2A261563040	2010-12-22	0.201279	0	5329	5135	5217.42	5211	Wang	15.7996	18.8327	12.9014	69.8718
alos10122	ALPSMN261563035	2010-12-22	ALAV2A261563030	2010-12-22	0.0673328	0	5322	5210	5278.05	5284	Mo	18.6011	14.6927	21.9163	61.0564
alos10123	ALPSMN261563035	2010-12-22	ALAV2A261563030	2010-12-22	0.0734218	0	5462	5270	5379.34	5383	Mo	31.5118	31.9915	29.6817	140.951
alos10124	ALPSMN261563035	2010-12-22	ALAV2A261563030	2010-12-22	0.236627	0	5220	5033	5135.66	5132	Mo	18.7556	20.2704	17.8425	58.991
alos10125	ALPSMN261563035	2010-12-22	ALAV2A261563030	2010-12-22	0.0543156	0	5469	5141	5310.53	5319	Mo	34.9382	37.2171	33.0237	168.064
alos10126	ALPSMN261563035	2010-12-22	ALAV2A261563030	2010-12-22	0.0265678	0	5365	5246	5307.62	5305	Mo	31.3913	25.7767	31.0074	82.9774
alos10127	ALPSMN261563035	2010-12-22	ALAV2A261563030	2010-12-22	2.93347	0	6646	5323	5938.3	5938	Nianchu	28.0013	31.9114	23.6166	336.825
alos10128	ALPSMN261563035	2010-12-22	ALAV2A261563030	2010-12-22	0.103627	0	5509	5274	5395.83	5393	Mo	29.8106	30.5612	28.2956	167.001
alos10129	ALPSMN207883040	2009-12-19	ALAV2A261563040	2010-12-22	0.287024	0	5593	4978	5339.29	5358	Mo	30.6636	30.429	31.1077	277.593
alos10130	ALPSMN261563035	2010-12-22	ALAV2A261563030	2010-12-22	0.0490463	0	5408	5267	5331.6	5327	Mo	26.2427	27.758	24.9852	191.264
alos10131	ALPSMN207883040	2009-12-19	ALAV2A261563040	2010-12-22	0.22204	0	5623	5128	5432.6	5460	Mo	24.0344	21.6431	27.0314	290.421
alos10132	ALPSMN261563035	2010-12-22	ALAV2A261563030	2010-12-22	0.0409301	0	5457	5345	5423.23	5431	Mo	26.2823	22.0444	29.7476	262.739
alos10133	ALPSMN207883040	2009-12-19	ALAV2A261563040	2010-12-22	0.137602	0	5537	5101	5388.49	5411	Mo	30.5835	30.1388	31.4092	328.272
alos10134	ALPSMN261563035	2010-12-22	ALAV2A261563030	2010-12-22	0.0268243	0	5519	5317	5443.45	5457	Mo	40.3128	31.2882	49.9799	159.839
alos10135	ALPSMN207883040	2009-12-19	ALAV2A261563040	2010-12-22	0.186045	0	5680	5293	5502.66	5518	Wang	33.1386	27.4224	37.6679	185.048
alos10136	ALPSMN207883040	2009-12-19	ALAV2A261563040	2010-12-22	0.211287	0	5628	5333	5454.34	5446	Mo	27.138	28.6248	25.5075	43.3664
alos10137	ALPSMN261563035	2010-12-22	ALAV2A261563030	2010-12-22	3.49408	0.798533	6018	4299	5084.56	5169	Mo	27.6502	32.5546	22.8261	119.543
alos10138	ALPSMN207883040	2009-12-19	ALAV2A261563040	2010-12-22	0.119307	0	5710	5382	5588.99	5603	Wang	37.4842	27.6456	47.604	210.584
alos10139	ALPSMN261563035	2010-12-22	ALAV2A261563030	2010-12-22	3.48923	0	5979	5037	5439.11	5430	Nianchu	19.9922	21.6334	18.2224	344.502
alos10140	ALPSMN261563035	2010-12-22	ALAV2A261563030	2010-12-22	3.29203	0.739416	5725	4016	4980.6	5097	Mo	22.2287	21.2077	23.2553	116.22
alos10141	ALPSMN261563035	2010-12-22	ALAV2A261563030	2010-12-22	2.55453	0	6272	4964	5594.06	5566	Nianchu	29.8195	34.4704	24.9694	308.146
alos10142	ALPSMN261563035	2010-12-22	ALAV2A261563030	2010-12-22	0.104987	0	5338	5174	5256.97	5256	Mo	17.0389	17.4165	16.6238	301.293
alos10143	ALPSMN261563035	2010-12-22	ALAV2A261563030	2010-12-22	0.0651917	0	5302	5181	5244.25	5245	Mo	22.2152	21.5863	22.8629	339.109
alos10144	ALPSMN261563035	2010-12-22	ALAV2A261563030	2010-12-22	0.58656	0.306383	5382	4924	5142.64	5127	Mo	23.7989	30.2911	16.9869	238.379
alos10145	ALPSMN261563035	2010-12-22	ALAV2A261563030	2010-12-22	2.90147	0	5936	5036	5573.21	5610	Nianchu	21.6552	21.6317	21.4497	300.068
alos10146	ALPSMN261563035	2010-12-22	ALAV2A261563030	2010-12-22	0.37459	0.110303	5445	4702	5052.77	5064	Mo	36.6754	36.3791	36.429	116.707
alos10147	ALPSMN261563035	2010-12-22	ALAV2A261563030	2010-12-22	0.0336818	0	5313	5189	5255.32	5253	Mo	26.3393	27.1392	27.169	15.5288
alos10148	ALPSMN261563035	2010-12-22	ALAV2A261563030	2010-12-22	1.56201	0	5896	5221	5597.69	5617	Nianchu	17.9875	15.1945	20.9553	299.853
alos10149	ALPSMN261563035	2010-12-22	ALAV2A261563030	2010-12-22	0.228134	0	5974	5430	5694.06	5690	Nianchu	24.4851	23.1134	26.3971	324.382
alos10150	ALPSMN261563035	2010-12-22	ALAV2A261563030	2010-12-22	1.49104	0.476823	5361	4209	4884.04	5017	Mo	27.1403	27.8849	26.1577	120.022
alos10151	ALPSMN207883040	2009-12-19	ALAV2A261563040	2010-12-22	0.184238	0	5337	5005	5185.82	5189	Mo	28.9412	26.3158	28.0619	33.5532
alos10152	ALPSMN261563035	2010-12-22	ALAV2A261563030	2010-12-22	0.126206	0	5422	5175	5320.49	5338	Mo	24.166	19.5288	29.0694	300.184
alos10153	ALPSMN261563035	2010-12-22	ALAV2A261563030	2010-12-22	0.577801	0	5434	4866	5222.22	5294	Mo	27.0564	18.4975	34.9892	116.987
alos10154	ALPSMN261563035	2010-12-22	ALAV2A261563030	2010-12-22	1.54796	0	6017	4922	5451.13	5424	Nianchu	26.7332	30.5828	22.6888	336.25
alos10155	ALPSMN261563035	2010-12-22	ALAV2A261563030	2010-12-22	1.0223	0	5435	4974	5190.35	5182	Mo	19.5941	22.53	15.5815	334.744
alos10156	ALPSMN261563035	2010-12-22	ALAV2A261563030	2010-12-22	0.0774748	0	5365	5154	5272.67	5279	Mo	22.52	21.5363	24.8249	137.222
alos10157	ALPSMN261563035	2010-12-22	ALAV2A261563030	2010-12-22	0.255041	0	5442	5106	5313.11	5325	Mo	20.8019	16.262	26.2201	292.668
alos10158	ALPSMN261563035	2010-12-22	ALAV2A261563030	2010-12-22	0.411767	0	5346	5113	5225.98	5227	Mo	17.4544	16.7139	17.5172	94.8589
alos10159	ALPSMN261563035	2010-12-22	ALAV2A261563030	2010-12-22	0.768658	0	5900	5044	5437.84	5406	Nianchu	32.045	32.627	31.1602	347.932
alos10160	ALPSMN261563035	2010-12-22	ALAV2A261563030	2010-12-22	0.10429	0	5451	5285	5366.16	5373	Mo	17.5429	19.7979	15.9266	310.791
alos10161	ALPSMN261563035	2010-12-22	ALAV2A261563030	2010-12-22	2.85579	1.13061	5929	4341	5018.48	4956	Mo	20.6381	24.858	16.3306	157.419
alos10162	ALPSMN261563035	2010-12-22	ALAV2A261563030	2010-12-22	0.115894	0	5365	5126	5239.6	5240	Mo	21.8084	23.8239	19.1295	132.491
alos10163	ALPSMN261563035	2010-12-22	ALAV2A261563030	2010-12-22	0.370333	0	5891	5068	5433.27	5436	Nianchu	36.0417	38.6329	33.3088	6.85279
alos10164	ALPSMN261563035	2010-12-22	ALAV2A261563030	2010-12-22	0.0394705	0	5363	5277	5321.6	5323	Mo	22.6522	21.0908	24.0567	116.843
alos10165	ALPSMN261563035	2010-12-22	ALAV2A261563030	2010-12-22	0.522995	0	5534	5016	5222.78	5217	Nianchu	25.3679	25.2776	25.4348	12.7555
alos10166	ALPSMN261563035	2010-12-22	ALAV2A261563030	2010-12-22	2.54226	0	5742	4915	5236.83	5189	Nianchu	18.6678	21.9482	15.4082	26.2301
alos10167	ALPSMN261563035	2010-12-22	ALAV2A261563030	2010-12-22	0.257391	0	5561	4987	5308.77	5346	Mo	29.33	22.4505	35.2377	101.59
alos10168	ALPSMN261563035	2010-12-22	ALAV2A261563030	2010-12-22	0.918071	0	5571	5026	5205.69	5171	Nianchu	18.0759	21.827	14.0352	83.0602
alos10169	ALPSMN261563035	2010-12-22	ALAV2A261563030	2010-12-22	1.2623	0	5502	4962	5274.87	5281	Nianchu	20.6036	20.3866	20.6161	337.203
alos10170	ALPSMN261563035	2010-12-22	ALAV2A212113030	2010-01-17	0.43476	0	5525	5102	5323.99	5321	Nianchu	21.0347	19.1561	22.7977	348.931
alos10171	ALPSMN261563035	2010-12-22	ALAV2A212113030	2010-01-17	0.452314	0	5525	5129	5381.85	5403	Nianchu	24.2927	21.9615	25.8566	347.937
alos10172	ALPSMN051073035	2007-01-09	ALAV2A212113030	2010-01-17	0.372154	0.0373308	5435	4923	5207.12	5225	Mo	27.0861	28.4919	24.822	277.261
alos10173	ALPSMN051073035	2007-01-09	ALAV2A212113030	2010-01-17	0.396624	0	5523	5076	5302.66	5313	Nianchu	29.4662	29.2801	28.7367	315.789
alos10174	ALPSMN051073035	2007-01-09	ALAV2A212113030	2010-01-17	0.511423	0	5441	4940	5124.68	5124	Mo	19.3356	20.4927	17.6092	62.0635
alos10175	ALPSMN051073035	2007-01-09	ALAV2A212113030	2010-01-17	0.357849	0	5375	5065	5249.63	5256	Nianchu	23.1738	17.4696	29.6629	319.302
alos10176	ALPSMN051073035	2007-01-09	ALAV2A212113030	2010-01-17	0.100963	0	5320	5126	5236.04	5244	Nianchu	26.0317	23.7591	30.0514	53.9363
alos10177	ALPSMN051073035	2007-01-09	ALAV2A212113030	2010-01-17	0.342526	0	5445	5019	5242.34	5236	Nianchu	22.3041	25.9062	17.183	308.462
alos10178	ALPSMN051073035	2007-01-09	ALAV2A212113030	2010-01-17	0.259884	0	5511	5057	5251.65	5213	Nianchu	23.0538	26.7564	18.6131	317.986
alos10179	ALPSMN051073035	2007-01-09	ALAV2A212113030	2010-01-17	0.0647303	0	5428	5299	5352.54	5352	Nianchu	16.7702	14.0358	19.0527	326.292
alos10180	ALPSMN051073035	2007-01-09	ALAV2A212113030	2010-01-17	1.05849	0	5582	5087	5332.65	5340	Nianchu	18.9752	19.1027	18.8634	45.756
alos10181	ALPSMN051073035	2007-01-09	ALAV2A212113030	2010-01-17	0.571217	0.100339	5677	4716	5165.78	5152	Mo	29.3256	30.2758	27.6918	278.938
alos10182	ALPSMN051073035	2007-01-09	ALAV2A212113030	2010-01-17	3.3461	0	5662	4863	5295.15	5312	Nianchu	21.1756	23.0449	19.1475	352.792
alos10183	ALPSMN051073035	2007-01-09	ALAV2A212113030	2010-01-17	1.16691	0	5581	5173	5355.73	5352	Nianchu	15.4953	16.8399	14.1145	266.76
alos10184	ALPSMN051073035	2007-01-09	ALAV2A212113030	2010-01-17	0.141327	0	5783	5343	5569.06	5539	Nianchu	29.8251	35.1956	23.7438	265.99
alos10185	ALPSMN051073035	2007-01-09	ALAV2A212113030	2010-01-17	0.0816786	0	5688	5309	5528.7	5532	Nianchu	37.1138	36.2535	36.2031	7.10785
alos10186	ALPSMN051073035	2007-01-09	ALAV2A212113030	2010-01-17	5.59779	0.99482	6008	4339	5084.27	5036	Mo	20.9512	25.5923	16.197	247.84
alos10187	ALPSMN051073035	2007-01-09	ALAV2A212113030	2010-01-17	0.79886	0	5699	5087	5380.5	5371	Mo	25.167	24.6902	25.3715	231.122
alos10188	ALPSMN051073035	2007-01-09	ALAV2A212113030	2010-01-17	1.4021	0	5918	5054	5487.36	5431	Nianchu	22.6413	25.5849	18.9815	344.855
alos10189	ALPSMN051073035	2007-01-09	ALAV2A212113030	2010-01-17	0.268998	0	5788	5483	5618.24	5619	Nianchu	17.2643	20.4716	13.7715	319.966
alos10190	ALPSMN051073035	2007-01-09	ALAV2A212113030	2010-01-17	0.703409	0	5900	5177	5568.45	5588	Nianchu	23.5348	20.8712	26.007	338
alos10191	ALPSMN051073035	2007-01-09	ALAV2A212113030	2010-01-17	1.23032	0.0763434	5860	4875	5537.72	5599	Mo	25.5796	26.6102	24.402	125.006
alos10192	ALPSMN051073035	2007-01-09	ALAV2A212113030	2010-01-17	0.148451	0	5667	5502	5595.24	5610	Nianchu	17.9865	18.0578	17.955	198.756
alos10193	ALPSMN051073035	2007-01-09	ALAV2A212113030	2010-01-17	1.87089	0.153561	5981	5053	5502.48	5466	Nianchu	19.7247	19.3802	20.0148	9.99728
alos10194	ALPSMN051073035	2007-01-09	ALAV2A212113030	2010-01-17	0.251929	0	5667	5313	5463.88	5463	Nianchu	20.2715	23.6852	17.9695	27.5167
alos10195	ALPSMN051073035	2007-01-09	ALAV2A212113030	2010-01-17	0.282564	0.0318545	5594	5265	5444.57	5452	Mo	29.0813	31.3003	27.6014	122.027
alos10196	ALPSMN051073035	2007-01-09	ALAV2A212113030	2010-01-17	0.0991784	0	5542	5466	5505.95	5502	Nianchu	10.0939	11.6206	8.55462	170.441
alos10197	ALPSMN051073035	2007-01-09	ALAV2A212113030	2010-01-17	0.0304727	0	5509	5448	5486.83	5491	Nianchu	15.3379	11.013	17.7737	171.918
alos10198	ALPSMN051073035	2007-01-09	ALAV2A212113030	2010-01-17	0.521941	0	5620	5331	5498.92	5510	Nianchu	17.0691	14.1558	19.7065	354.294
alos10199	ALPSMN051073035	2007-01-09	ALAV2A212113030	2010-01-17	0.239879	0.0469592	5704	5171	5395.63	5380	Mo	32.9469	35.4868	29.7071	154.447
alos10200	ALPSMN051073035	2007-01-09	ALAV2A212113030	2010-01-17	0.133664	0	5501	5352	5418.9	5418	Mo	17.9914	20.6162	17.0015	80.6113
alos10201	ALPSMN104753035	2008-01-12	ALAV2A212113030	2010-01-17	0.259171	0	6060	5625	5887.27	5903	Nianchu	30.9131	31.9492	28.7944	304.528
alos10202	ALPSMN051073035	2007-01-09	ALAV2A212113030	2010-01-17	0.707588	0.0301913	5760	5036	5428.07	5446	Mo	28.8584	24.9208	33.1758	134.653
alos10203	ALPSMN051073035	2007-01-09	ALAV2A212113030	2010-01-17	2.84621	0.382277	5977	4854	5354.75	5312	Mo	18.3301	23.3185	13.1699	32.3397
alos10204	ALPSMN051073035	2007-01-09	ALAV2A212113030	2010-01-17	2.40358	0.12278	5658	4800	5307.61	5356	Mo	19.7318	16.6292	22.9051	108.93
alos10205	ALPSMN259083035	2010-12-05	ALAV2A212113030	2010-01-17	0.101648	0	5407	5085	5242.11	5226	Mo	26.8355	26.3126	28.0338	291.084
alos10206	ALPSMN051073035	2007-01-09	ALAV2A212113030	2010-01-17	0.208261	0	5446	5165	5329.2	5338	Mo	22.118	18.398	24.9892	31.5333
alos10207	ALPSMN104753035	2008-01-12	ALAV2A212113030	2010-01-17	1.17347	0.119086	6078	5484	5745.07	5750	Nianchu	20.5504	24.476	16.1839	12.3819
alos10208	ALPSMN104753035	2008-01-12	ALAV2A212113030	2010-01-17	0.335742	0.031306	6302	5477	5999.04	6022	Mo	35.0689	35.0904	34.4879	188.972
alos10209	ALPSMN259083035	2010-12-05	ALAV2A212113030	2010-01-17	0.0426124	0	5347	5223	5279.32	5279	Mo	21.4552	22.53	21.1212	54.9392
alos10210	ALPSMN259083035	2010-12-05	ALAV2A212113030	2010-01-17	0.048295	0	5361	5235	5297.22	5292	Mo	27.9531	31.6685	23.822	44.5069
alos10211	ALPSMN051073035	2007-01-09	ALAV2A212113030	2010-01-17	0.210211	0	5523	5145	5307.69	5290	Mo	23.5911	26.5671	20.5099	14.2679
alos10212	ALPSMN259083035	2010-12-05	ALAV2A212113030	2010-01-17	0.116046	0	5310	5028	5139.64	5129	Mo	28.5481	31.9775	23.6666	338.622
alos10213	ALPSMN259083035	2010-12-05	ALAV2A212113030	2010-01-17	0.0940952	0	5337	5147	5243.48	5243	Mo	28.2339	31.7223	25.8363	303.542
alos10214	ALPSMN104753035	2008-01-12	ALAV2A212113030	2010-01-17	3.23653	0.106517	5940	5388	5672	5673	Nianchu	15.0572	16.6284	13.4372	12.1774
alos10215	ALPSMN259083035	2010-12-05	ALAV2A212113030	2010-01-17	0.168423	0	5766	5073	5489.29	5522	Mo	30.2799	27.0535	33.7635	241.186
alos10216	ALPSMN259083035	2010-12-05	ALAV2A212113030	2010-01-17	0.765638	0.216175	5694	5269	5477.37	5461	Mo	15.2024	17.7124	12.5769	236.306
alos10217	ALPSMN259083035	2010-12-05	ALAV2A212113030	2010-01-17	1.24908	0	5755	5183	5442.07	5448	Mo	18.3663	20.2562	15.657	255.548
alos10218	ALPSMN259083035	2010-12-05	ALAV2A212113030	2010-01-17	0.658572	0.188929	5675	4854	5156.87	5065	Mo	22.2249	27.3158	17.6772	292.865
alos10219	ALPSMN259083035	2010-12-05	ALAV2A212113030	2010-01-17	0.0420194	0	5755	5603	5685.57	5690	Mo	28.3032	21.3616	30.6137	165.742
alos10220	ALPSMN259083035	2010-12-05	ALAV2A212113030	2010-01-17	0.0292554	0	5754	5560	5672.13	5679	Mo	36.3521	31.9412	36.9991	101.146
alos10221	ALPSMN104753035	2008-01-12	ALAV2A212113030	2010-01-17	0.160727	0	5973	5698	5813.24	5796	Mo	22.7297	25.0841	23.6453	175.022
alos10222	ALPSMN104753035	2008-01-12	ALAV2A212113030	2010-01-17	0.0151378	0	5558	5480	5517.35	5524	Mo	36.2141	38.9701	36.1498	97.4791
alos10223	ALPSMN104753035	2008-01-12	ALAV2A212113030	2010-01-17	0.0767425	0	5668	5397	5522.72	5520	Mo	40.1625	36.7884	42.6923	293.59
alos10224	ALPSMN104753035	2008-01-12	ALAV2A212113030	2010-01-17	0.0370892	0	5517	5389	5451.83	5449	Mo	33.4666	30.9702	35.5327	123.456
alos10225	ALPSMN259083035	2010-12-05	ALAV2A212113030	2010-01-17	0.229809	0	5541	5143	5387.82	5399	Mo	19.8875	14.5657	26.1376	180.818
alos10226	ALPSMN259083035	2010-12-05	ALAV2A212113030	2010-01-17	0.122683	0	5344	5156	5255.47	5249	Mo	24.7875	26.3855	22.3835	240.93
alos10227	ALPSMN259083035	2010-12-05	ALAV2A212113030	2010-01-17	0.0453575	0	5367	5274	5332.76	5335	Mo	19.5582	16.345	26.0172	292.026
alos10228	ALPSMN104753035	2008-01-12	ALAV2A212113030	2010-01-17	0.29821	0	5471	5236	5337.4	5324	Mo	16.2519	19.6078	12.3872	60.3412
alos10229	ALPSMN104753035	2008-01-12	ALAV2A212113030	2010-01-17	1.70254	0	5897	5163	5610.55	5657	Mo	20.2638	16.7476	23.4866	250.501
alos10230	ALPSMN104753035	2008-01-12	ALAV2A212113030	2010-01-17	2.10551	0	5850	5388	5637.95	5644	Nianchu	19.7314	20.3534	19.0548	73.3266
alos10231	ALPSMN104753035	2008-01-12	ALAV2A212113030	2010-01-17	0.108622	0	5794	5653	5715.87	5706	Mo	25.5298	25.662	23.224	162.429
alos10232	ALPSMN259083035	2010-12-05	ALAV2A212113030	2010-01-17	3.56701	0.450592	6047	4529	5364.76	5372	Mo	22.4618	23.5866	20.9497	334.26
alos10233	ALPSMN104753035	2008-01-12	ALAV2A212113030	2010-01-17	0.137603	0	5894	5506	5724.45	5716	Mo	31.0234	26.2437	35.4155	183.179
alos10234	ALPSMN104753035	2008-01-12	ALAV2A212113030	2010-01-17	0.0983179	0	5897	5664	5815.42	5825	Mo	34.4511	25.7912	41.4474	131.973
alos10235	ALPSMN104753035	2008-01-12	ALAV2A212113040	2010-01-17	0.0541753	0	5053	4987	5009.98	5004	Mo	15.2644	19.2699	12.7362	332.249
alos10236	ALPSMN104753035	2008-01-12	ALAV2A212113040	2010-01-17	0.0196764	0	5070	5010	5040.79	5039	Mo	21.8812	19.5332	26.3982	300.229
alos10237	ALPSMN259083035	2010-12-05	ALAV2A212113030	2010-01-17	9.61892	0.725438	5896	4586	5398.46	5447	Mo	17.8308	17.8482	17.3058	189.291
alos10238	ALPSMN104753035	2008-01-12	ALAV2A212113030	2010-01-17	1.87559	0	5920	5193	5586.38	5600	Nianchu	19.9633	20.315	19.5605	0
alos10239	ALPSMN259083035	2010-12-05	ALAV2A212113030	2010-01-17	0.176763	0	5337	5032	5133.55	5102	Mo	26.3593	35.8329	15.9254	310.126
alos10240	ALPSMN259083035	2010-12-05	ALAV2A212113030	2010-01-17	0.365521	0	5531	5126	5306.97	5315	Mo	20.9672	19.7347	19.4882	309.961
alos10241	ALPSMN104753035	2008-01-12	ALAV2A212113030	2010-01-17	0.0945466	0	5781	5473	5609.16	5614	Mo	31.5706	33.4191	29.3716	188.997
alos10242	ALPSMN259083035	2010-12-05	ALAV2A212113030	2010-01-17	0.0179415	0	5360	5328	5347.1	5346	Mo	14.6916	13.3124	15.0208	89.6693
alos10243	ALPSMN259083035	2010-12-05	ALAV2A212113030	2010-01-17	0.844236	0	5728	5186	5480.81	5493	Mo	23.4208	25.0956	21.2657	340.693
alos10244	ALPSMN104753035	2008-01-12	ALAV2A212113030	2010-01-17	1.00607	0	5902	5318	5573.61	5558	Nianchu	25.5611	26.5959	24.7869	351.991
alos10245	ALPSMN259083035	2010-12-05	ALAV2A212113030	2010-01-17	0.0398251	0	5354	5285	5319.39	5314	Mo	22.4059	20.5466	30.6645	269.514
alos10246	ALPSMN259083035	2010-12-05	ALAV2A212113030	2010-01-17	0.220071	0	5476	4982	5317.18	5342	Mo	30.9406	28.6924	33.7803	279.201
alos10247	ALPSMN259083035	2010-12-05	ALAV2A212113030	2010-01-17	1.23124	0	5850	4997	5275.63	5256	Mo	19.2002	22.353	15.6299	231.894
alos10248	ALPSMN259083035	2010-12-05	ALAV2A212113030	2010-01-17	0.301367	0	5448	5057	5305.17	5306	Mo	27.7979	28.9529	26.7477	271.066
alos10249	ALPSMN259083035	2010-12-05	ALAV2A212113030	2010-01-17	0.363858	0	5525	5059	5263.66	5306	Mo	20.5626	18.9984	21.531	250.134
alos10250	ALPSMN104753035	2008-01-12	ALAV2A212113030	2010-01-17	0.366101	0	5854	5326	5556.16	5543	Nianchu	29.8651	35.0988	24.9432	4.4944
alos10251	ALPSMN259083035	2010-12-05	ALAV2A212113040	2010-01-17	0.0779774	0	5457	5184	5313.94	5300	Mo	25.6422	22.8364	26.2906	224.982
alos10252	ALPSMN259083035	2010-12-05	ALAV2A212113030	2010-01-17	0.879805	0	5901	4974	5561.72	5634	Pho	28.2459	25.8545	29.3291	151.258
alos10253	ALPSMN259083035	2010-12-05	ALAV2A212113030	2010-01-17	0.213184	0	5372	5164	5268.54	5273	Pho	19.7453	18.9406	19.5644	81.2052
alos10254	ALPSMN259083035	2010-12-05	ALAV2A212113030	2010-01-17	0.243518	0	5462	5095	5265.95	5256	Pho	23.2943	24.606	21.2569	69.4222
alos10255	ALPSMN259083035	2010-12-05	ALAV2A212113040	2010-01-17	0.0783408	0	5449	5341	5412.02	5413	Mo	18.1815	18.6729	18.5657	239.149
alos10256	ALPSMN259083035	2010-12-05	ALAV2A212113040	2010-01-17	0.03057	0	5459	5356	5423.76	5431	Mo	25.1548	14.3436	36.6199	243.489
alos10257	ALPSMN259083035	2010-12-05	ALAV2A212113030	2010-01-17	0.090908	0	5880	5528	5758.3	5795	Pho	31.3241	26.6785	35.9047	172.07
alos10258	ALPSMN259083035	2010-12-05	ALAV2A212113030	2010-01-17	7.90634	0.127381	5935	4533	5425.74	5465	Mo	17.1289	18.9161	15.165	353.141
alos10259	ALPSMN259083035	2010-12-05	ALAV2A212113030	2010-01-17	0.996906	0	5388	4746	5198.59	5229	Pho	18.2327	15.7985	20.2197	52.9933
alos10260	ALPSMN259083035	2010-12-05	ALAV2A212113040	2010-01-17	1.32053	0.566492	5716	4780	5068.24	4966	Mo	19.8497	26.2275	13.2848	260.995
alos10261	ALPSMN259083035	2010-12-05	ALAV2A212113040	2010-01-17	0.316154	0	5648	5167	5385.11	5393	Mo	21.1597	22.2596	19.8714	184.196
alos10262	ALPSMN259083035	2010-12-05	ALAV2A212113030	2010-01-17	0.271411	0	5843	5045	5390.35	5335	Pho	32.167	33.8324	30.0626	178.345
alos10263	ALPSMN259083035	2010-12-05	ALAV2A212113030	2010-01-17	0.48728	0	5305	4951	5157.71	5161	Pho	16.749	15.6657	17.4086	23.196
alos10264	ALPSMN259083035	2010-12-05	ALAV2A212113040	2010-01-17	0.830813	0.107811	5889	4994	5476.48	5538	Mo	25.3462	22.9083	27.1945	201.709
alos10265	ALPSMN259083035	2010-12-05	ALAV2A212113030	2010-01-17	0.112659	0	5326	5189	5250.96	5242	Pho	19.6266	22.8458	17.5203	150.983
alos10266	ALPSMN259083035	2010-12-05	ALAV2A212113030	2010-01-17	0.520014	0	5723	5319	5542.81	5558	Mo	22.2356	19.9826	23.6078	266.451
alos10267	ALPSMN259083035	2010-12-05	ALAV2A212113030	2010-01-17	0.393687	0	5460	5071	5267.53	5279	Pho	24.6358	21.084	27.48	115.905
alos10268	ALPSMN259083035	2010-12-05	ALAV2A212113030	2010-01-17	2.99359	0.434365	5847	4580	5232.78	5262	Pho	21.9854	22.4508	21.6696	81.1402
alos10269	ALPSMN259083035	2010-12-05	ALAV2A212113030	2010-01-17	0.75005	0	5741	5241	5511.54	5512	Mo	21.4735	21.7074	20.9567	283.079
alos10270	ALPSMN259083035	2010-12-05	ALAV2A212113040	2010-01-17	0.935287	0.142771	5700	4969	5188.08	5068	Pho	20.1881	28.0479	12.2073	336.519
alos10271	ALPSMN259083035	2010-12-05	ALAV2A212113030	2010-01-17	0.100032	0	5600	5056	5374.17	5414	Pho	37.2192	29.4017	42.8598	97.4601
alos10272	ALPSMN259083035	2010-12-05	ALAV2A212113030	2010-01-17	1.17976	0	5924	5311	5537.99	5513	Mo	19.4924	25.7698	12.9204	259.856
alos10273	ALPSMN259083035	2010-12-05	ALAV2A212113030	2010-01-17	0.585985	0.011748	5813	5312	5553.1	5558	Mo	25.8422	25.8125	25.2573	286.386
alos10274	ALPSMN259083035	2010-12-05	ALAV2A212113030	2010-01-17	0.242983	0	5834	5316	5598.46	5619	Mo	27.2592	28.1229	25.2686	279.186
alos10275	ALPSMN259083035	2010-12-05	ALAV2A212113040	2010-01-17	0.764534	0	5862	5151	5526.46	5540	Pho	27.2718	25.9634	28.6789	93.4678
alos10276	ALPSMN259083035	2010-12-05	ALAV2A212113040	2010-01-17	0.292919	0	5886	5344	5667.41	5683	Pho	32.2812	27.6323	35.3786	126.914
alos10277	ALPSMN259083035	2010-12-05	ALAV2A212113030	2010-01-17	0.875666	0	6178	5264	5606.79	5576	Mo	22.4523	24.9738	19.8475	278.296
alos10278	ALPSMN259083035	2010-12-05	ALAV2A212113030	2010-01-17	1.34529	0.202541	6226	5124	5559.9	5543	Mo	24.7462	26.7059	22.2379	284.46
alos10279	ALPSMN259083035	2010-12-05	ALAV2A212113030	2010-01-17	0.183828	0.0293645	5821	5412	5570.08	5568	Mo	31.5264	32.7464	27.329	262.51
alos10280	ALPSMN259083035	2010-12-05	ALAV2A212113040	2010-01-17	0.026159	0	5612	5262	5396.42	5371	Pho	52.6973	61.7593	45.8467	333.077
alos10281	ALPSMN259083035	2010-12-05	ALAV2A212113030	2010-01-17	0.131821	0	5806	5631	5692.61	5666	Pho	20.5336	24.9566	12.2207	161.026
alos10282	ALPSMN259083035	2010-12-05	ALAV2A212113040	2010-01-17	0.107742	0	5562	5244	5405.35	5401	Pho	31.0914	30.9043	28.8651	48.1086
alos10283	ALPSMN259083035	2010-12-05	ALAV2A212113030	2010-01-17	1.64619	0	5747	5137	5477.24	5508	Pho	19.843	20.0956	19.179	63.2969
alos10284	ALPSMN259083035	2010-12-05	ALAV2A212113040	2010-01-17	0.0476702	0	5322	5202	5250.38	5247	Pho	38.0001	38.3213	39.3358	324.535
alos10285	ALPSMN259083035	2010-12-05	ALAV2A212113040	2010-01-17	1.48556	0.0299363	5613	5150	5380.12	5374	Mo	18.1399	19.8975	15.9357	214.714
alos10286	ALPSMN259083035	2010-12-05	ALAV2A212113040	2010-01-17	0.0602577	0	5242	5134	5175.07	5179	Pho	21.0516	22.3665	19.598	323.352
alos10287	ALPSMN259083035	2010-12-05	ALAV2A212113040	2010-01-17	0.589165	0	5515	5014	5328.85	5366	Pho	24.0128	24.443	22.8653	91.5588
alos10288	ALPSMN259083035	2010-12-05	ALAV2A212113030	2010-01-17	0.471627	0	5471	5134	5314.18	5315	Pho	23.3563	19.8541	26.1618	114.479
alos10289	ALPSMN259083035	2010-12-05	ALAV2A212113040	2010-01-17	0.10081	0	5428	5261	5370.5	5383	Pho	23.2466	17.4487	25.9722	18.2169
alos10290	ALPSMN259083035	2010-12-05	ALAV2A212113040	2010-01-17	0.110351	0	5525	5318	5409.78	5415	Mo	22.533	23.0418	20.1819	228.689
alos10291	ALPSMN259083035	2010-12-05	ALAV2A212113040	2010-01-17	0.114029	0	5339	5177	5263.44	5275	Mo	21.9955	20.5788	22.8289	245.129
alos10292	ALPSMN259083035	2010-12-05	ALAV2A212113040	2010-01-17	0.0512438	0	5331	5131	5239.29	5236	Mo	34.4549	36.0243	32.8427	313.395
alos10293	ALPSMN104753035	2008-01-12	ALAV2A212113040	2010-01-17	0.0449958	0	5203	5115	5158.21	5158	Mo	24.0339	23.6013	22.9934	265.199
alos10294	ALPSMN259083035	2010-12-05	ALAV2A212113040	2010-01-17	0.503454	0	5655	5206	5460.06	5488	Mo	24.9691	25.3288	24.437	235.465
alos10295	ALPSMN259083035	2010-12-05	ALAV2A212113040	2010-01-17	0.726214	0	5538	5103	5357.71	5373	Mo	18.4239	17.034	19.6728	257.045
alos10296	ALPSMN259083035	2010-12-05	ALAV2A212113040	2010-01-17	0.0617295	0	5314	5192	5239.88	5235	Pho	17.2057	18.4999	15.0737	123.734
alos10297	ALPSMN259083035	2010-12-05	ALAV2A212113040	2010-01-17	0.190733	0	5394	5176	5300.56	5317	Pho	21.5515	21.0246	20.786	170.16
alos10298	ALPSMN259083035	2010-12-05	ALAV2A212113040	2010-01-17	0.303597	0	5499	5190	5340.76	5335	Mo	20.4893	20.7921	19.6955	243.899
alos10299	ALPSMN259083035	2010-12-05	ALAV2A212113040	2010-01-17	0.61007	0	5589	5197	5386.91	5395	Mo	22.9358	21.2129	23.9674	285.47
alos10300	ALPSMN259083035	2010-12-05	ALAV2A212113040	2010-01-17	0.644626	0	5511	5205	5364.97	5387	Mo	18.2538	16.6385	19.6055	275.044
alos10301	ALPSMN259083035	2010-12-05	ALAV2A212113040	2010-01-17	2.74665	0	5571	5085	5269.01	5264	Mo	17.7611	20.1449	14.993	265.828
alos10302	ALPSMN259083035	2010-12-05	ALAV2A212113040	2010-01-17	2.24905	0	5647	5239	5429.61	5437	Mo	16.7282	15.7408	17.5727	247.033
alos10303	ALPSMN259083035	2010-12-05	ALAV2A212113040	2010-01-17	0.118048	0	5252	5151	5201.18	5200	Pho	17.1237	19.9101	15.397	38.4061
alos10304	ALPSMN259083035	2010-12-05	ALAV2A212113040	2010-01-17	0.900695	0	5557	5142	5380.52	5393	Pho	16.4699	17.1001	15.7533	83.0729
alos10305	ALPSMN259083035	2010-12-05	ALAV2A212113030	2010-01-17	12.3437	0.596507	7178	4944	5792.61	5761	Nianchu	17.1915	18.8629	15.421	329.053
alos10306	ALPSMN259083035	2010-12-05	ALAV2A212113030	2010-01-17	0.702382	0.182235	6648	5525	5891.26	5862	Nianchu	28.851	34.3524	21.9967	334.066
alos10307	ALPSMN259083035	2010-12-05	ALAV2A212113040	2010-01-17	0.351688	0	5674	5197	5423.26	5482	Pho	22.0574	19.3154	24.9896	34.4307
alos10308	ALPSMN259083035	2010-12-05	ALAV2A212113030	2010-01-17	11.9924	2.56852	7086	4425	5587.2	5429	Pho	22.7245	25.8545	19.0772	260.814
alos10309	ALPSMN259083035	2010-12-05	ALAV2A212113040	2010-01-17	2.24207	0	5658	5235	5462.34	5460	Pho	17.3427	16.0848	17.8561	65.8456
alos10310	ALPSMN259083035	2010-12-05	ALAV2A212113040	2010-01-17	0.985405	0	5519	5155	5334.8	5343	Pho	16.9709	15.4164	18.2444	153.798
alos10311	ALPSMN259083035	2010-12-05	ALAV2A212113030	2010-01-17	0.424029	0	5530	5084	5344.69	5347	Pho	22.2299	20.5272	23.131	198.652
alos10312	ALPSMN259083035	2010-12-05	ALAV2A212113030	2010-01-17	0.638965	0	5753	5205	5456.02	5450	Pho	26.3522	26.5986	26.0262	112.201
alos10313	ALPSMN259083035	2010-12-05	ALAV2A212113030	2010-01-17	0.629512	0	5546	5009	5274.3	5273	Pho	28.5551	30.4935	27.1826	263.893
alos10314	ALPSMN259083035	2010-12-05	ALAV2A212113030	2010-01-17	1.7511	0.210561	6627	5598	6003.63	5977	Nianchu	18.4503	24.1566	13.4567	344.579
alos10315	ALPSMN259083035	2010-12-05	ALAV2A212113030	2010-01-17	0.0704297	0	5409	5208	5289.31	5282	Pho	29.2792	35.2566	21.1792	247.637
alos10316	ALPSMN259083035	2010-12-05	ALAV2A212113040	2010-01-17	0.832164	0	5495	5047	5309.76	5320	Pho	21.6903	22.4499	20.406	10.1033
alos10317	ALPSMN259083035	2010-12-05	ALAV2A212113030	2010-01-17	0.103423	0	6173	5895	6028.29	6015	Nianchu	30.2443	31.4165	29.3829	6.42305
alos10318	ALPSMN259083035	2010-12-05	ALAV2A212113040	2010-01-17	0.14161	0	5407	5291	5363.54	5367	Pho	19.0547	17.4627	18.8869	191.434
alos10319	ALPSMN259083035	2010-12-05	ALAV2A212113040	2010-01-17	0.0343004	0	5342	5179	5263	5258	Pho	28.0422	25.0969	36.2853	64.3264
alos10320	ALPSMN259083035	2010-12-05	ALAV2A212113030	2010-01-17	1.90636	0	5766	4965	5377.36	5354	Pho	18.668	20.6358	16.3603	162.89
alos10321	ALPSMN259083035	2010-12-05	ALAV2A212113040	2010-01-17	0.0692364	0	5336	5245	5296.56	5293	Pho	14.2988	12.7914	18.2546	40.7056
alos10322	ALPSMN259083035	2010-12-05	ALAV2A212113040	2010-01-17	0.129223	0	5305	5092	5198.55	5199	Pho	23.7172	29.2346	17.5144	39.2601
alos10323	ALPSMN212113040	2010-01-17	ALAV2A212113040	2010-01-17	0.0486318	0	5193	5071	5133.96	5132	Pho	27.9136	30.4261	25.5604	340.295
alos10324	ALPSMN212113040	2010-01-17	ALAV2A212113040	2010-01-17	0.318349	0	5458	5085	5304.9	5316	Pho	25.9546	24.1056	25.5409	277.138
alos10325	ALPSMN212113040	2010-01-17	ALAV2A212113040	2010-01-17	0.175246	0	5438	5160	5305.08	5315	Pho	20.5088	17.2318	23.8887	273.815
alos10326	ALPSMN212113040	2010-01-17	ALAV2A212113040	2010-01-17	0.143723	0	5342	5057	5190.22	5200	Pho	28.9736	28.7207	27.8948	350.868
alos10327	ALPSMN212113040	2010-01-17	ALAV2A212113040	2010-01-17	0.125606	0	5423	5175	5305.52	5309	Pho	22.4725	18.925	25.0463	247.032
alos10328	ALPSMN259083035	2010-12-05	ALAV2A212113030	2010-01-17	1.45794	0.124081	6504	5526	5989.93	5953	Nianchu	20.5436	23.4923	17.459	16.0464
alos10329	ALPSMN259083035	2010-12-05	ALAV2A212113040	2010-01-17	0.55946	0	5345	5037	5224.96	5226	Pho	15.7871	14.0586	17.2165	42.0807
alos10330	ALPSMN212113040	2010-01-17	ALAV2A212113040	2010-01-17	0.0424153	0	5171	5116	5137.76	5133	Pho	12.523	15.3539	11.5333	30.5944
alos10331	ALPSMN212113040	2010-01-17	ALAV2A212113040	2010-01-17	0.165663	0	5454	5089	5298.46	5317	Pho	26.2442	27.2773	24.5605	71.8878
alos10332	ALPSMN259083035	2010-12-05	ALAV2A212113030	2010-01-17	4.19316	2.09879	5998	4680	5272.17	5321	Pho	22.5309	25.7349	18.6811	205.327
alos10333	ALPSMN212113040	2010-01-17	ALAV2A212113040	2010-01-17	0.0778039	0	5240	5165	5200.53	5196	Pho	21.6279	26.4871	17.893	271.006
alos10334	ALPSMN212113040	2010-01-17	ALAV2A212113040	2010-01-17	0.327566	0	5355	5039	5161.33	5168	Pho	20.1017	22.1949	18.2127	284.342
alos10335	ALPSMN259083035	2010-12-05	ALAV2A212113030	2010-01-17	1.055	0	5529	5122	5383.59	5391	Pho	18.298	16.7662	19.6287	104.243
alos10336	ALPSMN212113040	2010-01-17	ALAV2A212113040	2010-01-17	0.189506	0	5491	4949	5249.08	5236	Pho	34.6565	28.8054	37.8073	357.756
alos10337	ALPSMN212113040	2010-01-17	ALAV2A212113040	2010-01-17	0.345719	0	5338	4961	5096.05	5079	Pho	18.5622	18.998	17.56	50.1881
alos10338	ALPSMN259083035	2010-12-05	ALAV2A212113030	2010-01-17	3.01007	0.252803	6831	5556	6067.33	6033	Nianchu	18.7054	21.0783	16.5198	2.86623
alos10339	ALPSMN212113040	2010-01-17	ALAV2A212113040	2010-01-17	0.182668	0	5246	5022	5125.1	5117	Pho	23.2922	25.8841	18.1422	268.886
alos10340	ALPSMN259083035	2010-12-05	ALAV2A212113030	2010-01-17	0.117832	0	5392	5280	5339.67	5346	Pho	18.2563	14.453	21.5006	204.271
alos10341	ALPSMN212113040	2010-01-17	ALAV2A212113040	2010-01-17	0.214712	0	5244	5075	5173.79	5181	Pho	19.7842	17.5764	19.8777	352.624
alos10342	ALPSMN212113035	2010-01-17	ALAV2A212113030	2010-01-17	1.13244	0	5707	5178	5464.11	5468	Pho	23.7566	23.8876	23.6433	244.979
alos10343	ALPSMN259083035	2010-12-05	ALAV2A212113030	2010-01-17	1.60096	0.290993	5530	4957	5293.3	5332	Pho	17.477	19.6112	14.9649	195.166
alos10344	ALPSMN212113035	2010-01-17	ALAV2A212113030	2010-01-17	0.444219	0	5583	5069	5349.61	5363	Pho	26.9529	25.6823	27.9678	264.227
alos10345	ALPSMN212113035	2010-01-17	ALAV2A212113030	2010-01-17	0.843091	0	5602	4972	5250.01	5238	Pho	32.2786	31.4203	32.5046	324.995
alos10346	ALPSMN212113035	2010-01-17	ALAV2A212113030	2010-01-17	0.949905	0	5611	5220	5425.82	5432	Pho	20.7227	21.87	19.2251	259.792
alos10347	ALPSMN212113035	2010-01-17	ALAV2A212113030	2010-01-17	0.28112	0	5615	5193	5401.35	5401	Pho	29.8677	33.7965	25.6969	281.928
alos10348	ALPSMN212113035	2010-01-17	ALAV2A212113030	2010-01-17	0.562704	0	5623	5113	5297.61	5268	Pho	21.4811	26.4451	15.8609	252.099
alos10349	ALPSMN259083035	2010-12-05	ALAV2A212113030	2010-01-17	7.7958	0.602783	7026	5303	5973.44	5989	Nianchu	19.9786	22.0154	17.9573	9.79795
alos10350	ALPSMN212113035	2010-01-17	ALAV2A212113030	2010-01-17	0.147178	0	5495	5241	5350.48	5343	Pho	27.3531	27.8888	26.1381	183.147
alos10351	ALPSMN212113035	2010-01-17	ALAV2A212113030	2010-01-17	0.138975	0	5401	5135	5249.3	5244	Pho	33.4531	35.3392	32.0275	305.512
alos10352	ALPSMN212113035	2010-01-17	ALAV2A212113030	2010-01-17	0.371378	0	5686	5213	5463.72	5452	Pho	28.184	26.589	29.0372	104.286
alos10353	ALPSMN212113035	2010-01-17	ALAV2A212113030	2010-01-17	0.0181099	0	5245	5170	5202.37	5200	Pho	30.4727	28.7306	23.8433	280.295
alos10354	ALPSMN212113035	2010-01-17	ALAV2A212113030	2010-01-17	0.277018	0	5416	5073	5266.13	5275	Pho	25.5281	26.5892	24.5706	280.505
alos10355	ALPSMW091333030	2007-10-12	ALAV2A212113030	2010-01-17	0.0430758	0	5971	5813	5877.31	5868	Nianchu	29.179	32.7241	21.2142	336.302
alos10356	ALPSMN212113035	2010-01-17	ALAV2A212113030	2010-01-17	0.873692	0	5630	5174	5392	5390	Pho	24.5742	25.04	23.767	75.7137
alos10357	ALPSMN212113035	2010-01-17	ALAV2A212113030	2010-01-17	0.419581	0	5612	5231	5446.87	5454	Pho	24.8094	24.0147	24.7828	87.2835
alos10358	ALPSMN212113035	2010-01-17	ALAV2A212113030	2010-01-17	0.304918	0	5387	5124	5257.87	5263	Pho	24.9833	24.4789	26.0849	101.998
alos10359	ALPSMN212113035	2010-01-17	ALAV2A212113030	2010-01-17	0.544118	0	5614	5127	5388.39	5397	Pho	23.2119	23.2904	22.2234	56.2095
alos10360	ALPSMN212113035	2010-01-17	ALAV2A212113030	2010-01-17	0.230754	0	5462	5072	5263.9	5249	Pho	25.9104	23.6088	27.2478	54.2997
alos10361	ALPSMN212113035	2010-01-17	ALAV2A212113030	2010-01-17	0.802546	0	5625	5173	5408.56	5404	Pho	20.8768	20.445	20.581	94.6176
alos10362	ALPSMN212113035	2010-01-17	ALAV2A212113030	2010-01-17	0.194186	0	5177	5025	5095.26	5097	Pho	12.9835	14.0499	12.2678	76.7246
alos10363	ALPSMW091333030	2007-10-12	ALAV2A212113030	2010-01-17	0.082914	0	6136	5932	6036.54	6034	Nianchu	25.3925	21.7983	28.3509	91.6255
alos10364	ALPSMW091333030	2007-10-12	ALAV2A212113030	2010-01-17	0.332231	0	6113	5643	5861.82	5847	Nianchu	22.638	25.2992	20.2358	17.2241
alos10365	ALPSMN259083035	2010-12-05	ALAV2A212113030	2010-01-17	14.0253	1.10303	6871	4918	5716.6	5754	Nianchu	15.6439	18.8825	12.0688	11.1687
alos10366	ALPSMN212113035	2010-01-17	ALAV2A212113030	2010-01-17	24.5228	14.9754	5902	4360	5035.35	5025	Pho	18.4513	25.3925	11.1434	200.348
alos10367	ALPSMW091333030	2007-10-12	ALAV2A212113030	2010-01-17	0.0898909	0	6069	5778	5991.57	6017	Nianchu	23.119	18.1955	27.6834	78.1226
alos10368	ALPSMW091333030	2007-10-12	ALAV2A212113030	2010-01-17	0.140887	0	6064	5697	5869.69	5857	Nianchu	31.5598	34.715	28.1971	29.3233
alos10369	ALPSMN212113030	2010-01-17	ALAV2A212113030	2010-01-17	0.532817	0	6185	5641	5923	5909	Nianchu	25.7318	28.3259	23.5215	348.665
alos10370	ALPSMW091333030	2007-10-12	ALAV2A212113030	2010-01-17	0.0273952	0	5983	5837	5918.93	5917	Nianchu	32.7513	28.2911	36.5069	302.544
alos10371	ALPSMW091333030	2007-10-12	ALAV2A212113030	2010-01-17	0.0930037	0	5979	5703	5833.46	5831	Nianchu	25.5369	27.08	25.9298	328.317
alos10372	ALPSMW091333030	2007-10-12	ALAV2A212113030	2010-01-17	0.0900448	0	5978	5637	5802.56	5787	Nianchu	29.8881	35.2208	24.9629	5.62016
alos10373	ALPSMW091333030	2007-10-12	ALAV2A212113030	2010-01-17	0.264749	0	5993	5745	5877.86	5881	Nianchu	18.9223	19.6034	19.1479	352.182
alos10374	ALPSMN212113030	2010-01-17	ALAV2A212113030	2010-01-17	0.569079	0	6186	5799	5995.24	5994	Nianchu	21.4644	20.3469	22.7646	46.1164
alos10375	ALPSMW091333030	2007-10-12	ALAV2A212113030	2010-01-17	0.618484	0	6103	5725	5947.68	5964	Nianchu	21.0076	18.5368	22.8082	237.973
alos10376	ALPSMW091333030	2007-10-12	ALAV2A212113030	2010-01-17	0.130733	0	6053	5893	6001.45	6005	Nianchu	18.5847	16.0138	19.788	93.8619
alos10377	ALPSMW091333030	2007-10-12	ALAV2A212113030	2010-01-17	0.0239006	0	6026	5929	5973.56	5973	Nianchu	35.6155	33.4585	38.0785	23.1188
alos10378	ALPSMW091333030	2007-10-12	ALAV2A212113030	2010-01-17	1.14672	0	6062	5526	5784.72	5801	Nianchu	20.2387	23.2709	17.1697	332.76
alos10379	ALPSMW091333030	2007-10-12	ALAV2A212113030	2010-01-17	0.620487	0	6094	5679	5862.45	5847	Nianchu	21.687	27.2114	15.8881	35.1412
alos10380	ALPSMN212113030	2010-01-17	ALAV2A212113030	2010-01-17	28.9053	3.26157	6900	5164	5841.56	5824	Nianchu	15.3022	20.5365	9.88	24.9693
alos10381	ALPSMW091333030	2007-10-12	ALAV2A212113030	2010-01-17	0.0319006	0	5829	5725	5771.79	5767	Nianchu	24.4213	29.9668	19.559	356.799
alos10382	ALPSMW091333030	2007-10-12	ALAV2A212113030	2010-01-17	0.307287	0	6068	5671	5878.47	5908	Nianchu	19.9323	16.0351	23.6582	331.137
alos10383	ALPSMW091333030	2007-10-12	ALAV2A212113030	2010-01-17	0.0110961	0	5866	5791	5827.55	5826	Nianchu	28.8727	25.2014	28.4861	9.944
alos10384	ALPSMN212113035	2010-01-17	ALAV2A212113030	2010-01-17	1.18975	0.711162	6174	4740	5295.98	5328	Pho	32.1866	35.5321	28.1979	214.139
alos10385	ALPSMW091333030	2007-10-12	ALAV2A212113030	2010-01-17	0.0870475	0	6063	5872	5977.53	5973	Nianchu	22.7755	26.175	18.7976	81.0089
alos10386	ALPSMN212113035	2010-01-17	ALAV2A212113030	2010-01-17	0.153232	0	5240	5102	5157.99	5145	Pho	17.6567	20.3118	15.6268	152.486
alos10387	ALPSMN212113035	2010-01-17	ALAV2A212113030	2010-01-17	0.0616678	0	5411	5106	5262.61	5269	Pho	44.9647	48.4761	38.1343	298.144
alos10388	ALPSMW091333030	2007-10-12	ALAV2A212113030	2010-01-17	0.442567	0	6069	5731	5883.05	5878	Nianchu	17.1607	17.1348	16.1445	25.7132
alos10389	ALPSMW091333030	2007-10-12	ALAV2A212113030	2010-01-17	0.607479	0	5941	5573	5742.15	5741	Nianchu	18.9602	21.9492	15.5438	326.246
alos10390	ALPSMN212113035	2010-01-17	ALAV2A212113030	2010-01-17	0.0964112	0	5326	5183	5255.75	5249	Pho	25.016	28.6822	20.2971	292.883
alos10391	ALPSMN212113035	2010-01-17	ALAV2A212113030	2010-01-17	0.116415	0	5391	5189	5293.6	5293	Pho	28.6523	30.1043	27.3885	309.126
alos10392	ALPSMN212113035	2010-01-17	ALAV2A212113030	2010-01-17	0.0282312	0	5435	5336	5369.83	5363	Pho	23.94	33.7272	15.4709	141.29
alos10393	ALPSMN212113035	2010-01-17	ALAV2A212113030	2010-01-17	0.0173835	0	5471	5420	5446.85	5447	Pho	23.952	19.9315	24.992	119.111
alos10394	ALPSMW091333030	2007-10-12	ALAV2A212113030	2010-01-17	0.785151	0	5950	5528	5732.87	5722	Nianchu	18.0886	20.7017	15.2586	342.423
alos10395	ALPSMN212113035	2010-01-17	ALAV2A212113030	2010-01-17	0.459827	0	5792	5074	5324.14	5265	Pho	27.4268	35.9852	18.7982	139.465
alos10396	ALPSMW091333030	2007-10-12	ALAV2A212113030	2010-01-17	0.17525	0	6011	5753	5880.12	5875	Nianchu	25.5476	30.8155	20.3163	322.114
alos10397	ALPSMW091333030	2007-10-12	ALAV2A212113030	2010-01-17	0.409771	0	6087	5604	5787.75	5766	Nianchu	23.4079	24.1707	22.2004	10.3336
alos10398	ALPSMW091333030	2007-10-12	ALAV2A212113030	2010-01-17	0.0412459	0	6112	6023	6078.37	6086	Nianchu	24.6497	19.7078	34.4745	312.13
alos10399	ALPSMW091333030	2007-10-12	ALAV2A212113030	2010-01-17	0.045285	0	6103	6014	6073.4	6077	Nianchu	19.4906	17.1104	26.0009	258.55
alos10400	ALPSMW091333030	2007-10-12	ALAV2A212113030	2010-01-17	0.0575405	0	6202	6005	6124.38	6129	Nianchu	37.0191	29.4268	44.3692	280.568
alos10401	ALPSMW091333030	2007-10-12	ALAV2A212113030	2010-01-17	0.625317	0	6210	5707	5886.27	5873	Nianchu	21.0043	25.9819	15.9979	351.04
alos10402	ALPSMW091333030	2007-10-12	ALAV2A212113030	2010-01-17	0.0186905	0	6024	5930	5973.1	5972	Nianchu	27.9279	27.3049	26.2032	335.485
alos10403	ALPSMW091333030	2007-10-12	ALAV2A212113030	2010-01-17	1.38372	0	6211	5791	6029.12	6024	Nianchu	22.0575	21.2278	22.8052	136.299
alos10404	ALPSMN212113030	2010-01-17	ALAV2A212113030	2010-01-17	2.7556	0.811054	6669	5757	6133.55	6113	Nianchu	20.536	21.5159	18.6886	16.0657
alos10405	ALPSMW091333030	2007-10-12	ALAV2A212113030	2010-01-17	0.381071	0	6056	5620	5799.26	5797	Nianchu	17.1432	15.5837	18.6637	3.60522
alos10406	ALPSMW091333030	2007-10-12	ALAV2A212113030	2010-01-17	0.132942	0	5990	5777	5868.97	5866	Nianchu	24.7087	27.7388	22.6804	355.983
alos10407	ALPSMW091333030	2007-10-12	ALAV2A212113030	2010-01-17	0.092451	0	5885	5759	5832.23	5841	Nianchu	18.2356	14.7913	21.7353	344.684
alos10408	ALPSMW091333030	2007-10-12	ALAV2A212113030	2010-01-17	0.509544	0	6179	5807	5965.84	5961	Nianchu	18.305	18.9011	17.7105	89.4052
alos10409	ALPSMW091333030	2007-10-12	ALAV2A212113030	2010-01-17	0.188475	0	5995	5747	5862.46	5851	Nianchu	21.017	25.7147	17.0875	338.979
alos10410	ALPSMW091333030	2007-10-12	ALAV2A212113030	2010-01-17	2.24664	0	6087	5696	5881.7	5874	Nianchu	13.9134	15.1025	12.7287	64.5482
alos10411	ALPSMN212113035	2010-01-17	ALAV2A212113030	2010-01-17	10.5985	9.19478	6293	4104	4682.69	4575	Pho	19.7043	28.9033	10.5076	155.694
alos10412	ALPSMW091333030	2007-10-12	ALAV2A212113030	2010-01-17	0.933735	0	6092	5704	5866.06	5866	Nianchu	16.4615	19.9162	12.8274	38.5323
alos10413	ALPSMN212113030	2010-01-17	ALAV2A212113030	2010-01-17	0.405443	0	6596	5982	6383.83	6389	Nianchu	34.0395	30.6618	37.1237	30.2999
alos10414	ALPSMW091333030	2007-10-12	ALAV2A212113030	2010-01-17	0.669664	0	6091	5583	5782.52	5767	Nianchu	22.2063	26.2756	17.8918	359.719
alos10415	ALPSMN212113035	2010-01-17	ALAV2A212113040	2010-01-17	0.0259056	0	5293	5203	5254.25	5258	Pho	23.8826	19.8468	29.2586	299.547
alos10416	ALPSMN212113035	2010-01-17	ALAV2A212113040	2010-01-17	0.0767308	0	5249	5131	5194.28	5198	Pho	23.9044	22.565	21.689	337.789
alos10417	ALPSMW091333030	2007-10-12	ALAV2A212113030	2010-01-17	0.114923	0	6088	5888	6015.56	6035	Langkamu	21.1603	14.8862	27.1516	78.8925
alos10418	ALPSMN212113035	2010-01-17	ALAV2A212113040	2010-01-17	0.0284872	0	5309	5233	5283.58	5287	Pho	18.718	14.8088	17.4808	129.719
alos10419	ALPSMN212113035	2010-01-17	ALAV2A212113040	2010-01-17	0.275736	0	5420	5174	5325.92	5331	Pho	18.3062	16.4202	19.8041	142.263
alos10420	ALPSMN212113030	2010-01-17	ALAV2A212113030	2010-01-17	12.3017	1.07549	7193	5150	5853.05	5726	Nianchu	18.0807	22.2806	13.7571	19.4382
alos10421	ALPSMN212113035	2010-01-17	ALAV2A212113030	2010-01-17	0.663094	0	6979	5322	6291.07	6443	Pho	45.1255	35.9786	54.437	175.358
alos10422	ALPSMW091333030	2007-10-12	ALAV2A212113030	2010-01-17	0.574237	0	6060	5615	5786.89	5771	Langkamu	19.225	22.6412	15.7959	0.0810285
alos10423	ALPSMN212113035	2010-01-17	ALAV2A212113040	2010-01-17	0.0219234	0	5402	5323	5372.88	5372	Pho	20.6809	23.6638	18.6184	121.734
alos10424	ALPSMN212113035	2010-01-17	ALAV2A212113040	2010-01-17	0.059634	0	5451	5306	5387.05	5387	Pho	28.4936	24.793	34.6943	107.818
alos10425	ALPSMN212113035	2010-01-17	ALAV2A212113040	2010-01-17	0.622667	0	5498	4977	5197.62	5219	Pho	18.1729	21.0821	15.2539	79.2253
alos10426	ALPSMN212113035	2010-01-17	ALAV2A212113040	2010-01-17	0.134395	0	5436	5199	5288.12	5279	Pho	25.4195	32.0411	16.3117	289.124
alos10427	ALPSMW091333030	2007-10-12	ALAV2A212113030	2010-01-17	0.345231	0	6070	5723	5878.15	5859	Langkamu	18.7741	21.2255	15.3761	352.246
alos10428	ALPSMN212113035	2010-01-17	ALAV2A212113040	2010-01-17	0.694461	0	5446	5176	5322.77	5330	Pho	17.4928	18.5187	16.5307	160.469
alos10429	ALPSMW091333030	2007-10-12	ALAV2A212113030	2010-01-17	0.125308	0	6024	5676	5857.96	5865	Langkamu	25.0061	25.0757	25.5468	11.8432
alos10430	ALPSMN212113035	2010-01-17	ALAV2A212113040	2010-01-17	0.0242919	0	5513	5330	5430.42	5436	Pho	38.0173	33.6586	44.7081	22.0919
alos10431	ALPSMN212113035	2010-01-17	ALAV2A212113030	2010-01-17	1.86267	0.754232	6076	4651	5312.54	5226	Pho	28.9129	29.7291	27.642	206.849
alos10432	ALPSMN212113035	2010-01-17	ALAV2A212113040	2010-01-17	0.610667	0	5669	5169	5387.58	5382	Pho	21.33	24.6402	17.8621	22.6051
alos10433	ALPSMN212113035	2010-01-17	ALAV2A212113030	2010-01-17	0.375406	0.0908512	6186	5047	5574.94	5405	Pho	37.3624	38.56	35.8313	248.342
alos10434	ALPSMW091333030	2007-10-12	ALAV2A212113030	2010-01-17	0.0462505	0	6060	5996	6038.04	6039	Nianchu	17.7527	13.3075	21.4297	346.238
alos10435	ALPSMN212113035	2010-01-17	ALAV2A212113040	2010-01-17	0.449184	0	5419	5111	5286.19	5293	Pho	19.9816	17.7857	22.1768	217.239
alos10436	ALPSMN212113035	2010-01-17	ALAV2A212113030	2010-01-17	0.20555	0	5503	5120	5305.93	5298	Pho	27.1147	29.6132	24.1146	172.26
alos10437	ALPSMN212113035	2010-01-17	ALAV2A212113040	2010-01-17	1.16029	0	5585	5131	5405.63	5429	Pho	21.3818	17.0606	25.6788	55.6186
alos10438	ALPSMN212113035	2010-01-17	ALAV2A212113040	2010-01-17	0.118108	0	5323	5033	5197.67	5205	Pho	39.4175	38.7732	39.303	249.672
alos10439	ALPSMN212113035	2010-01-17	ALAV2A212113040	2010-01-17	0.111569	0	5272	5074	5182.74	5183	Pho	34.8687	33.928	33.3077	327.862
alos10440	ALPSMN212113035	2010-01-17	ALAV2A212113040	2010-01-17	0.195648	0	5424	5233	5328.56	5328	Pho	22.1284	22.5544	23.4873	34.4785
alos10441	ALPSMN212113035	2010-01-17	ALAV2A212113030	2010-01-17	0.423565	0	5834	5209	5541.55	5551	Pho	30.6657	33.027	30.288	195.118
alos10442	ALPSMW091333030	2007-10-12	ALAV2A212113030	2010-01-17	0.186774	0	6019	5856	5947.41	5952	Langkamu	17.9896	16.7604	20.4702	149.324
alos10443	ALPSMN212113035	2010-01-17	ALAV2A212113040	2010-01-17	0.141618	0	5545	5314	5468.61	5473	Pho	28.3986	23.2705	32.5904	138.277
alos10444	ALPSMN212113035	2010-01-17	ALAV2A212113030	2010-01-17	0.415919	0.0592127	5600	5004	5353.23	5397	Pho	33.3091	31.6246	34.3222	189.637
alos10445	ALPSMN212113035	2010-01-17	ALAV2A212113040	2010-01-17	0.409374	0	5533	5096	5307.85	5303	Pho	22.4458	24.8074	20.2838	76.9316
alos10446	ALPSMW091333030	2007-10-12	ALAV2A212113030	2010-01-17	0.0728161	0	6089	5794	5963.81	5975	Langkamu	39.013	37.489	40.6187	8.64486
alos10447	ALPSMN212113035	2010-01-17	ALAV2A212113040	2010-01-17	0.212759	0	5475	5097	5308.23	5326	Pho	27.8985	24.0913	31.0476	45.9758
alos10448	ALPSMN212113035	2010-01-17	ALAV2A212113040	2010-01-17	0.0330919	0	5400	5296	5348.41	5348	Pho	25.9581	25.3114	27.3389	115.719
alos10449	ALPSMN212113035	2010-01-17	ALAV2A212113040	2010-01-17	0.0369729	0	5222	5171	5200.21	5200	Pho	18.4894	16.113	20.2254	196.317
alos10450	ALPSMN212113035	2010-01-17	ALAV2A212113040	2010-01-17	0.685258	0	5505	5205	5352.35	5354	Pho	17.7477	19.4379	16.3931	172.764
alos10451	ALPSMN212113035	2010-01-17	ALAV2A212113030	2010-01-17	0.670797	0.159202	5906	4765	5265.13	5286	Pho	32.8546	33.4869	32.3764	80.6987
alos10452	ALPSMN212113030	2010-01-17	ALAV2A212113030	2010-01-17	16.2408	0.0357134	6781	5147	5761.84	5688	Nianchu	16.5649	19.0044	14.1748	326.253
alos10453	ALPSMN212113035	2010-01-17	ALAV2A212113040	2010-01-17	0.0652477	0	5200	5156	5176.55	5176	Pho	9.5399	11.0438	7.23267	43.2479
alos10454	ALPSMN212113035	2010-01-17	ALAV2A212113040	2010-01-17	0.0553042	0	5503	5336	5418.8	5413	Pho	31.9644	32.2008	30.0376	12.596
alos10455	ALPSMN212113035	2010-01-17	ALAV2A212113040	2010-01-17	0.499327	0	5515	5221	5414.89	5426	Pho	20.5963	16.4553	24.3875	163.531
alos10456	ALPSMN212113035	2010-01-17	ALAV2A212113030	2010-01-17	46.9629	21.1774	7075	4075	5263.41	5177	Pho	19.9866	23.0684	16.8982	162.586
alos10457	ALPSMN212113035	2010-01-17	ALAV2A212113040	2010-01-17	0.21773	0	5407	5090	5257.46	5272	Pho	25.8014	21.5857	29.8965	355.972
alos10458	ALPSMN212113035	2010-01-17	ALAV2A212113040	2010-01-17	0.323578	0	5652	4817	5280.42	5274	Pho	30.2876	29.0419	31.5977	286.71
alos10459	ALPSMN212113030	2010-01-17	ALAV2A212113030	2010-01-17	2.14521	0	6432	5750	6031.99	6015	Nianchu	17.5591	18.5272	16.7657	346.482
alos10460	ALPSMN212113035	2010-01-17	ALAV2A212113040	2010-01-17	0.128029	0	5647	5307	5437.28	5434	Pho	24.2891	27.5093	20.6263	156.018
alos10461	ALPSMN212113035	2010-01-17	ALAV2A212113040	2010-01-17	0.0928831	0	5583	5329	5457.51	5454	Pho	27.3998	23.9671	29.971	110.783
alos10462	ALPSMN212113035	2010-01-17	ALAV2A212113040	2010-01-17	0.0958082	0	5525	5216	5449.98	5480	Pho	28.7417	14.3508	39.1942	72.55
alos10463	ALPSMN212113030	2010-01-17	ALAV2A212113030	2010-01-17	2.12285	0	6550	5715	6063.69	5985	Langkamu	15.4825	17.9085	12.855	7.63438
alos10464	ALPSMN212113035	2010-01-17	ALAV2A212113040	2010-01-17	0.199882	0	5408	5183	5304.01	5305	Pho	23.7677	22.0684	26.0736	304.747
alos10465	ALPSMN212113030	2010-01-17	ALAV2A212113030	2010-01-17	9.67119	0.138866	7048	5490	6219.29	6139	Langkamu	17.3208	17.3623	17.1531	5.43155
alos10466	ALPSMN212113030	2010-01-17	ALAV2A212113030	2010-01-17	1.35856	0	6483	5869	6163.04	6185	Langkamu	24.0044	24.8559	23.6364	5.59495
alos10467	ALPSMN212113035	2010-01-17	ALAV2A102273040	2007-12-26	0.0974505	0	5381	5206	5307.27	5309	Pho	23.2585	17.983	28.1496	321.634
alos10468	ALPSMN212113035	2010-01-17	ALAV2A102273040	2007-12-26	0.139774	0	5393	5203	5297.22	5299	Pho	26.2039	24.9946	26.6385	353.995
alos10469	ALPSMN212113040	2010-01-17	ALAV2A102273040	2007-12-26	0.0859479	0	5196	5136	5176.67	5180	Pho	12.7089	10.0748	15.5565	279.782
alos10470	ALPSMN212113035	2010-01-17	ALAV2A102273040	2007-12-26	0.153369	0	5314	5105	5180.82	5161	Pho	17.7408	20.9522	14.4822	329.631
alos10471	ALPSMN212113040	2010-01-17	ALAV2A102273040	2007-12-26	0.299129	0	5279	5082	5198.11	5204	Pho	19.956	15.0002	24.8736	340.649
alos10472	ALPSMN212113035	2010-01-17	ALAV2A102273040	2007-12-26	0.05519	0	5289	5047	5168.57	5167	Pho	31.0669	30.4133	27.3544	298.304
alos10473	ALPSMN212113035	2010-01-17	ALAV2A102273040	2007-12-26	0.0990069	0	5356	5193	5262.04	5244	Pho	19.4645	19.988	17.3649	268.801
alos10474	ALPSMN212113035	2010-01-17	ALAV2A102273040	2007-12-26	0.0253852	0	5327	5221	5275.54	5271	Pho	28.189	28.8191	29.4171	327.075
alos10475	ALPSMN212113035	2010-01-17	ALAV2A102273040	2007-12-26	0.298939	0	5382	5210	5323.81	5330	Pho	18.5698	15.0892	22.8913	285.793
alos10476	ALPSMN212113035	2010-01-17	ALAV2A102273040	2007-12-26	1.23577	0.0932058	5585	4947	5293.93	5302	Pho	20.8952	21.4249	19.7415	283.177
alos10477	ALPSMN212113035	2010-01-17	ALAV2A212113030	2010-01-17	5.05545	2.43146	6974	4332	5185.22	5057	Pho	20.9232	23.8195	17.9822	168.988
alos10478	ALPSMN212113035	2010-01-17	ALAV2A102273040	2007-12-26	0.228538	0	5491	5311	5427.03	5436	Pho	20.637	17.47	24.4729	210.462
alos10479	ALPSMN212113035	2010-01-17	ALAV2A102273040	2007-12-26	0.173316	0.144908	5343	4970	5130.54	5100	Pho	27.0383	31.09	21.4814	269.263
alos10480	ALPSMN212113035	2010-01-17	ALAV2A102273040	2007-12-26	0.948831	0.0254002	5616	5125	5376.09	5379	Pho	20.9263	19.8382	22.1334	229.989
alos10481	ALPSMN212113035	2010-01-17	ALAV2A102273040	2007-12-26	1.29845	0	5497	5158	5350.65	5343	Pho	17.1619	17.657	16.4883	276.176
alos10482	ALPSMN212113035	2010-01-17	ALAV2A102273040	2007-12-26	0.0506114	0	5358	5204	5295.93	5300	Pho	24.9933	23.8377	26.4088	247.056
alos10483	ALPSMN212113030	2010-01-17	ALAV2A212113030	2010-01-17	0.769408	0	6352	5934	6196.69	6217	Langkamu	21.6001	17.3754	25.5629	18.3447
alos10484	ALPSMN212113035	2010-01-17	ALAV2A102273040	2007-12-26	0.104825	0	5435	5153	5360.07	5380	Pho	26.1802	22.7628	29.4093	306.455
alos10485	ALPSMN212113040	2010-01-17	ALAV2A102273040	2007-12-26	0.179678	0	5215	5041	5121.2	5111	Pho	17.5456	22.4147	12.3165	268.872
alos10486	ALPSMN212113035	2010-01-17	ALAV2A102273040	2007-12-26	0.165584	0	5509	5159	5362.86	5360	Pho	26.7619	25.3816	27.1641	318.039
alos10487	ALPSMN212113030	2010-01-17	ALAV2A212113030	2010-01-17	1.15393	0	6743	5817	6322.61	6362	Langkamu	21.9449	17.7159	26.4012	36.1629
alos10488	ALPSMN212113035	2010-01-17	ALAV2A102273040	2007-12-26	0.483137	0	5529	5376	5459.95	5463	Pho	15.8079	13.9483	16.7581	84.7308
alos10489	ALPSMN212113035	2010-01-17	ALAV2A102273040	2007-12-26	0.0663095	0	5500	5371	5443.54	5451	Pho	21.3431	20.2361	21.493	82.1605
alos10490	ALPSMN212113030	2010-01-17	ALAV2A212113030	2010-01-17	0.469542	0	6647	5961	6351.88	6358	Langkamu	25.5637	26.6448	24.3387	88.927
alos10491	ALPSMN212113035	2010-01-17	ALAV2A102273040	2007-12-26	0.198458	0	5524	5279	5435.22	5447	Pho	18.759	16.1014	20.0708	40.453
alos10492	ALPSMN212113035	2010-01-17	ALAV2A102273040	2007-12-26	0.604291	0	5542	5213	5397.52	5401	Pho	19.6214	16.9634	22.3667	139.494
alos10493	ALPSMN212113040	2010-01-17	ALAV2A102273040	2007-12-26	0.179169	0	5285	5122	5222.81	5229	Pho	20.9743	19.7091	22.102	67.5894
alos10494	ALPSMN212113040	2010-01-17	ALAV2A102273040	2007-12-26	0.0447919	0	5200	5005	5131.16	5147	Pho	22.8573	19.1017	27.4924	310.668
alos10495	ALPSMN212113040	2010-01-17	ALAV2A102273040	2007-12-26	0.0415937	0	5187	5095	5126.94	5121	Pho	21.9325	28.8163	14.5952	298.41
alos10496	ALPSMN212113035	2010-01-17	ALAV2A102273040	2007-12-26	1.83956	0	5588	5134	5314.33	5281	Pho	17.0218	21.7144	12.1959	18.2143
alos10497	ALPSMN212113035	2010-01-17	ALAV2A102273040	2007-12-26	0.129749	0	5448	5215	5371.45	5377	Pho	21.2523	18.0626	24.7644	283.459
alos10498	ALPSMN212113035	2010-01-17	ALAV2A102273040	2007-12-26	1.11112	0	5610	5254	5442.16	5464	Pho	19.5191	16.0677	23.07	260.682
alos10499	ALPSMN212113035	2010-01-17	ALAV2A102273040	2007-12-26	0.238329	0	5433	5241	5330.28	5330	Pho	18.4893	18.1267	18.9291	315.099
alos10500	ALPSMN212113040	2010-01-17	ALAV2A102273040	2007-12-26	0.0856128	0	5190	5049	5125.44	5123	Pho	26.5634	24.7204	25.2888	351.236
alos10501	ALPSMN212113035	2010-01-17	ALAV2A212113030	2010-01-17	3.64367	1.19711	6857	4379	5641.48	5261	Pho	24.1413	19.7339	28.1572	164.909
alos10502	ALPSMN212113035	2010-01-17	ALAV2A102273040	2007-12-26	0.21787	0	5446	5229	5327.7	5332	Pho	20.9939	18.2271	24.3848	60.0467
alos10503	ALPSMN212113035	2010-01-17	ALAV2A102273040	2007-12-26	1.11635	0.0704159	5624	5106	5335.92	5331	Pho	22.7826	23.8857	20.9329	325.691
alos10504	ALPSMN212113035	2010-01-17	ALAV2A102273040	2007-12-26	0.406337	0	5488	5140	5327.86	5340	Pho	17.6426	17.3175	17.4184	153.989
alos10505	ALPSMN212113040	2010-01-17	ALAV2A102273040	2007-12-26	0.166154	0	5254	5066	5160.61	5154	Pho	20.3851	21.0921	19.7502	328.084
alos10506	ALPSMN212113035	2010-01-17	ALAV2A102273040	2007-12-26	0.375334	0	5610	5290	5496.54	5524	Pho	22.6201	17.8126	27.7039	245.282
alos10507	ALPSMN212113035	2010-01-17	ALAV2A102273040	2007-12-26	0.17588	0	5629	5262	5470.72	5495	Pho	31.9524	26.0267	37.0798	253.375
alos10508	ALPSMN212113035	2010-01-17	ALAV2A102273040	2007-12-26	0.0942349	0	5460	5199	5332.83	5334	Pho	28.4239	32.0854	24.6314	319.035
alos10509	ALPSMN212113035	2010-01-17	ALAV2A102273040	2007-12-26	0.0201607	0	5533	5444	5495.73	5507	Pho	31.0286	18.2039	35.2177	77.334
alos10510	ALPSMN212113040	2010-01-17	ALAV2A102273040	2007-12-26	0.0574725	0	5214	5081	5168.05	5170	Pho	20.0528	16.7476	20.3614	325.016
alos10511	ALPSMN212113035	2010-01-17	ALAV2A102273040	2007-12-26	0.0116053	0	5483	5406	5453.23	5459	Pho	37.0393	30.5683	39.0899	64.2035
alos10512	ALPSMN212113035	2010-01-17	ALAV2A102273040	2007-12-26	0.115262	0	5550	5334	5457.18	5459	Pho	23.9314	22.944	21.6268	61.117
alos10513	ALPSMN212113035	2010-01-17	ALAV2A102273040	2007-12-26	0.0454162	0	5502	5361	5415.4	5408	Pho	24.9839	27.9443	24.9054	45.2852
alos10514	ALPSMN212113035	2010-01-17	ALAV2A102273040	2007-12-26	0.162767	0	5546	5302	5418.87	5424	Pho	25.5635	25.3836	24.7661	60.7774
alos10515	ALPSMN212113035	2010-01-17	ALAV2A102273040	2007-12-26	0.195471	0	5610	5335	5494.79	5499	Pho	25.5736	25.8184	24.5762	87.8823
alos10516	ALPSMN212113035	2010-01-17	ALAV2A102273040	2007-12-26	0.0854861	0	5555	5223	5309.42	5268	Pho	19.3375	20.3193	17.2037	219.373
alos10517	ALPSMN212113035	2010-01-17	ALAV2A102273040	2007-12-26	0.14743	0	5584	5332	5499.98	5501	Pho	29.0337	23.8969	32.9766	65.6498
alos10518	ALPSMN212113035	2010-01-17	ALAV2A102273040	2007-12-26	0.0885789	0	5554	5322	5416.8	5406	Mangde	20.1207	23.5411	15.9068	101.905
alos10519	ALPSMN212113035	2010-01-17	ALAV2A102273040	2007-12-26	0.0879127	0	5553	5251	5356.82	5345	Mangde	29.8045	28.7294	30.3668	40.8194
alos10520	ALPSMN212113030	2010-01-17	ALAV2A212113030	2010-01-17	79.5621	3.98601	7051	5216	6197.02	6339	Langkamu	16.5733	18.1191	15.0253	348.77
alos10521	ALPSMN212113035	2010-01-17	ALAV2A102273040	2007-12-26	0.282542	0	5564	5318	5456.78	5475	Pho	20.1391	13.7403	26.3109	240.83
alos10522	ALPSMN229763040	2010-05-18	ALAV2A102273040	2007-12-26	0.814045	0	5365	5011	5175.31	5160	Pho	20.0102	21.9418	17.7916	320.978
alos10523	ALPSMN229763040	2010-05-18	ALAV2A102273040	2007-12-26	0.26288	0	5438	5105	5261.08	5268	Mangde	21.5134	21.2315	21.5901	271.748
alos10524	ALPSMN212113035	2010-01-17	ALAV2A102273040	2007-12-26	1.33882	0.20584	5524	5199	5343.83	5336	Pho	18.1668	21.4193	14.3739	292.486
alos10525	ALPSMN212113035	2010-01-17	ALAV2A102273040	2007-12-26	0.600573	0	5552	5238	5408.07	5399	Pho	19.2046	19.1628	18.7539	265.936
alos10526	ALPSMN212113035	2010-01-17	ALAV2A102273040	2007-12-26	0.226762	0	5543	5380	5483.78	5497	Pho	17.4333	13.5207	22.0663	193.452
alos10527	ALPSMN212113035	2010-01-17	ALAV2A102273040	2007-12-26	2.0242	0.22051	5684	5209	5406.69	5417	Pho	19.0209	20.8553	16.4432	275.844
alos10528	ALPSMN229763040	2010-05-18	ALAV2A102273040	2007-12-26	0.0726129	0	5314	5156	5231.53	5237	Mangde	25.2673	26.0902	25.1455	349.373
alos10529	ALPSMN212113035	2010-01-17	ALAV2A102273040	2007-12-26	0.0473081	0	5370	5261	5318.55	5322	Pho	17.9187	14.7197	20.6929	299.383
alos10530	ALPSMN229763040	2010-05-18	ALAV2A102273040	2007-12-26	0.453746	0	5435	5129	5264.13	5268	Mangde	21.7896	22.722	21.9	162.226
alos10531	ALPSMN229763040	2010-05-18	ALAV2A102273040	2007-12-26	0.0324505	0	5366	5200	5283.11	5268	Mangde	24.4452	25.3768	26.3894	13.4852
alos10532	ALPSMN229763040	2010-05-18	ALAV2A102273040	2007-12-26	0.20134	0	5366	5020	5205.57	5201	Mangde	21.3514	25.2261	18.9217	136.152
alos10533	ALPSMN212113035	2010-01-17	ALAV2A102273040	2007-12-26	0.0810363	0	5498	5319	5397.43	5395	Pho	24.9704	25.9666	23.9935	336.348
alos10534	ALPSMN212113030	2010-01-17	ALAV2A212113030	2010-01-17	0.0116877	0	6120	6009	6076.15	6080	Langkamu	37.1899	33.1299	36.7571	1.6978
alos10535	ALPSMN212113035	2010-01-17	ALAV2A102273040	2007-12-26	0.150692	0	5574	5323	5502.07	5515	Mangde	22.9946	16.6275	24.8498	67.1163
alos10536	ALPSMN212113035	2010-01-17	ALAV2A102273040	2007-12-26	3.32022	0.968521	5670	5151	5357.86	5360	Pho	17.7063	20.8901	14.5848	330.757
alos10537	ALPSMN212113030	2010-01-17	ALAV2A212113030	2010-01-17	0.0143069	0	6123	5996	6060.73	6059	Langkamu	39.1706	42.3495	37.2651	2.06753
alos10538	ALPSMN212113035	2010-01-17	ALAV2A102273040	2007-12-26	0.0519321	0	5576	5404	5499.56	5504	Mangde	36.0408	32.3697	34.3818	42.3458
alos10539	ALPSMN212113030	2010-01-17	ALAV2A212113030	2010-01-17	0.0266857	0	6138	5958	6049.7	6055	Langkamu	38.0205	37.5104	37.1423	14.2428
alos10540	ALPSMN212113035	2010-01-17	ALAV2A102273040	2007-12-26	0.0253166	0	5720	5579	5684.32	5690	Mangde	26.9062	16.1659	26.1613	73.5356
alos10541	ALPSMN229763040	2010-05-18	ALAV2A102273040	2007-12-26	3.66155	0	5758	5155	5439.57	5450	Pho	15.8728	16.7911	14.7304	230.379
alos10542	ALPSMN212113030	2010-01-17	ALAV2A212113030	2010-01-17	0.2528	0	6347	6129	6255.33	6270	Langkamu	20.9161	18.626	22.8961	320.031
alos10543	ALPSMN212113035	2010-01-17	ALAV2A212113030	2010-01-17	13.1621	3.14197	6875	4281	5743.68	6169	Pho	23.0319	20.5948	25.4176	190.45
alos10544	ALPSMN212113035	2010-01-17	ALAV2A102273040	2007-12-26	0.495428	0	5649	5331	5497.37	5503	Pho	20.5813	21.8246	19.702	269.037
alos10545	ALPSMN212113035	2010-01-17	ALAV2A102273040	2007-12-26	1.50763	0	5750	5337	5506.31	5492	Mangde	14.9762	17.9128	11.5851	161.816
alos10546	ALPSMN212113030	2010-01-17	ALAV2A212113030	2010-01-17	0.279629	0	6419	6098	6259.31	6256	Langkamu	21.0877	20.918	21.1658	251.659
alos10547	ALPSMN212113035	2010-01-17	ALAV2A102273040	2007-12-26	0.304946	0	5663	5261	5484.79	5515	Pho	22.3434	20.4112	24.4016	288.719
alos10548	ALPSMN229763040	2010-05-18	ALAV2A102273040	2007-12-26	0.0612629	0	5624	5399	5521.67	5529	Mangde	28.9871	24.7415	30.4004	65.1626
alos10549	ALPSMN212113035	2010-01-17	ALAV2A102273040	2007-12-26	1.47984	0	5583	5190	5395.78	5400	Pho	21.3124	19.3023	23.54	342.819
alos10550	ALPSMN212113035	2010-01-17	ALAV2A102273040	2007-12-26	0.120415	0	5587	5482	5534.92	5538	Pho	20.2082	17.2936	23.713	224.217
alos10551	ALPSMN229763040	2010-05-18	ALAV2A102273040	2007-12-26	0.0751905	0	5552	5420	5494.09	5498	Mangde	19.7694	20.396	19.6337	92.8727
alos10552	ALPSMN229763040	2010-05-18	ALAV2A102273040	2007-12-26	0.50397	0	5642	5305	5516.22	5528	Mangde	17.0455	12.1758	22.1413	262.488
alos10553	ALPSMN229763040	2010-05-18	ALAV2A102273040	2007-12-26	0.0373258	0	5465	5295	5409.27	5421	Mangde	27.678	23.1946	30.7825	283.684
alos10554	ALPSMN229763040	2010-05-18	ALAV2A102273040	2007-12-26	0.719161	0.0433487	5678	5212	5469.75	5479	Mangde	20.371	18.799	21.6445	242.643
alos10555	ALPSMN229763040	2010-05-18	ALAV2A102273040	2007-12-26	0.0440282	0	5461	5337	5395.74	5392	Mangde	34.4059	34.9667	34.2135	140.743
alos10556	ALPSMN212113035	2010-01-17	ALAV2A102273040	2007-12-26	0.533183	0	5677	5310	5458.07	5437	Pho	20.4345	24.0198	16.8122	294.498
alos10557	ALPSMN212113035	2010-01-17	ALAV2A102273040	2007-12-26	0.0108309	0	5513	5494	5503.43	5503	Pho	13.3157	20.8518	10.7998	130.699
alos10558	ALPSMN212113035	2010-01-17	ALAV2A102273040	2007-12-26	0.694885	0	5666	5339	5509.37	5514	Pho	20.3861	21.3809	18.9511	251.33
alos10559	ALPSMN212113035	2010-01-17	ALAV2A102273040	2007-12-26	0.0116576	0	5493	5467	5484.79	5486	Pho	14.7589	12.6382	11.4018	96.3095
alos10560	ALPSMN212113035	2010-01-17	ALAV2A102273040	2007-12-26	0.0275401	0	5485	5367	5424.44	5421	Pho	31.4665	29.4913	31.4648	36.0263
alos10561	ALPSMN229763040	2010-05-18	ALAV2A102273040	2007-12-26	0.856742	0	5666	5217	5485.28	5523	Mangde	18.4325	17.4502	18.1761	350.396
alos10562	ALPSMN212113035	2010-01-17	ALAV2A102273040	2007-12-26	0.037332	0	5421	5239	5327.33	5331	Pho	34.2214	34.2806	32.2551	359.059
alos10563	ALPSMN212113035	2010-01-17	ALAV2A102273040	2007-12-26	0.471504	0	5693	5377	5525.99	5525	Pho	14.733	15.4477	14.1994	323.714
alos10564	ALPSMN212113035	2010-01-17	ALAV2A102273040	2007-12-26	0.0880595	0	5679	5489	5578.15	5575	Pho	21.4558	22.4577	20.4393	201.328
alos10565	ALPSMN229763040	2010-05-18	ALAV2A102273040	2007-12-26	2.52698	0	5879	5332	5588.82	5596	Mangde	16.4969	16.5792	16.1379	216.369
alos10566	ALPSMN212113030	2010-01-17	ALAV2A212113030	2010-01-17	3.96024	0.157207	6708	5782	6220.47	6201	Langkamu	21.2252	26.6442	15.7977	304.11
alos10567	ALPSMN212113030	2010-01-17	ALAV2A212113030	2010-01-17	0.0226134	0	6105	6005	6057.44	6063	Langkamu	31.678	31.1115	33.8747	1.85844
alos10568	ALPSMN229763040	2010-05-18	ALAV2A102273040	2007-12-26	0.584958	0	5731	5445	5581.21	5582	Pho	18.4032	19.2683	17.1866	163.413
alos10569	ALPSMN212113030	2010-01-17	ALAV2A212113030	2010-01-17	0.650064	0	6502	5856	6174.31	6185	Langkamu	18.7614	17.9794	19.1999	287.295
alos10570	ALPSMN212113030	2010-01-17	ALAV2A212113030	2010-01-17	3.13202	0.0575455	6867	5853	6398.01	6411	Langkamu	16.6301	18.5293	14.4285	261.977
alos10571	ALPSMN229763040	2010-05-18	ALAV2A102273040	2007-12-26	3.83476	0	5749	5142	5475.24	5478	Mangde	19.2632	17.5811	20.9678	220.477
alos10572	ALPSMN212113030	2010-01-17	ALAV2A212113030	2010-01-17	3.63659	0	6674	5802	6164.81	6137	Langkamu	16.2793	22.609	9.94483	303.539
alos10573	ALPSMN229763040	2010-05-18	ALAV2A102273040	2007-12-26	0.6259	0	5639	5365	5538.69	5558	Mangde	14.9128	13.604	16.3405	219.711
alos10574	ALPSMN229763040	2010-05-18	ALAV2A102273040	2007-12-26	4.55176	0	5761	5311	5511.07	5510	Pho	15.6733	18.2739	13.1768	21.683
alos10575	ALPSMN212113030	2010-01-17	ALAV2A212113030	2010-01-17	9.48947	0.286968	6870	5531	6339.41	6351	Langkamu	19.165	24.2489	14.1464	283.142
alos10576	ALPSMN229763040	2010-05-18	ALAV2A102273040	2007-12-26	0.957762	0	5878	5380	5571.2	5578	Pho	20.3025	18.8839	21.7203	1.80284
alos10577	ALPSMN229763040	2010-05-18	ALAV2A102273040	2007-12-26	0.42366	0	5612	5358	5510.71	5522	Mangde	17.8278	16.9171	17.9132	218.718
alos10578	ALPSMN212113035	2010-01-17	ALAV2A212113030	2010-01-17	3.18016	1.27895	6464	4708	5657.58	5443	Pho	18.9706	18.733	18.7938	182.249
alos10579	ALPSMN229763040	2010-05-18	ALAV2A102273040	2007-12-26	2.33448	0	5877	5321	5629.3	5650	Mangde	14.7724	15.2223	14.2516	39.9728
alos10580	ALPSMN229763040	2010-05-18	ALAV2A102273040	2007-12-26	2.65992	0	5728	5178	5394.26	5343	Mangde	16.3667	18.5024	14.3892	77.0837
alos10581	ALPSMN212113030	2010-01-17	ALAV2A212113030	2010-01-17	2.4664	0	6499	5762	6045.51	6030	Langkamu	20.4763	23.9134	17.4887	347.475
alos10582	ALPSMN229763040	2010-05-18	ALAV2A102273040	2007-12-26	0.0600733	0	5628	5485	5554.02	5548	Mangde	20.4122	20.125	22.9774	61.2962
alos10583	ALPSMN229763040	2010-05-18	ALAV2A102273040	2007-12-26	2.11495	0	5517	5000	5309.88	5305	Mangde	17.2113	18.8878	15.2448	258.933
alos10584	ALPSMN229763040	2010-05-18	ALAV2A102273040	2007-12-26	2.18559	0	5731	5344	5533.47	5553	Mangde	14.9641	13.8454	16.2115	131.387
alos10585	ALPSMN229763040	2010-05-18	ALAV2A102273040	2007-12-26	0.941404	0	5660	5210	5490.1	5494	Mangde	20.401	19.0553	20.4124	136.302
alos10586	ALPSMN229763040	2010-05-18	ALAV2A102273040	2007-12-26	0.656673	0	5723	5359	5501.12	5486	Mangde	16.2063	17.161	15.2169	52.6267
alos10587	ALPSMN229763040	2010-05-18	ALAV2A102273040	2007-12-26	0.445236	0	5630	5422	5516.57	5507	Mangde	17.4201	18.8711	15.6114	43.4256
alos10588	ALPSMN229763040	2010-05-18	ALAV2A102273040	2007-12-26	0.217611	0	5312	5090	5222.51	5241	Mangde	23.1888	17.9474	27.3409	274.392
alos10589	ALPSMN229763040	2010-05-18	ALAV2A102273040	2007-12-26	0.59607	0	5493	5111	5374.33	5409	Mangde	21.2912	16.883	24.9294	219.702
alos10590	ALPSMN229763035	2010-05-18	ALAV2A102273040	2007-12-26	0.694005	0	5590	5200	5356.73	5347	Pho	20.4057	21.6451	18.5748	320.661
alos10591	ALPSMN212113030	2010-01-17	ALAV2A212113030	2010-01-17	1.30168	0	6271	5909	6063.42	6058	Langkamu	19.3238	18.5185	19.9076	23.7381
alos10592	ALPSMN229763040	2010-05-18	ALAV2A102273040	2007-12-26	0.270489	0	5644	5332	5517.6	5523	Mangde	21.3954	19.7706	22.6939	3.49323
alos10593	ALPSMN229763040	2010-05-18	ALAV2A102273040	2007-12-26	0.185847	0	5434	5169	5277.77	5266	Mangde	23.6725	24.4119	24.2912	41.1651
alos10594	ALPSMN229763040	2010-05-18	ALAV2A102273040	2007-12-26	0.0284414	0	5288	5180	5225.93	5221	Mangde	33.9436	37.2771	25.4358	317.881
alos10595	ALPSMN229763035	2010-05-18	ALAV2A212113030	2010-01-17	10.9266	1.68059	6852	4562	5801.43	6003	Pho	18.1191	14.1193	22.3595	165.627
alos10596	ALPSMN229763040	2010-05-18	ALAV2A102273040	2007-12-26	0.170903	0	5593	5527	5560.76	5560	Mangde	12.5823	12.4286	13.3525	140.555
alos10597	ALPSMN229763040	2010-05-18	ALAV2A102273040	2007-12-26	0.72857	0	5590	5337	5500.55	5511	Mangde	18.3459	16.2568	20.3004	54.6581
alos10598	ALPSMN229763040	2010-05-18	ALAV2A102273040	2007-12-26	0.385472	0	5465	5234	5362.8	5381	Mangde	20.4673	16.9856	24.2116	186.861
alos10599	ALPSMN229763040	2010-05-18	ALAV2A102273040	2007-12-26	0.0521669	0	5229	5176	5199.49	5199	Mangde	15.4968	19.1118	15.5889	42.8725
alos10600	ALPSMN212113030	2010-01-17	ALAV2A212113030	2010-01-17	0.490704	0	6234	5842	6020.58	6021	Kuri	17.3162	21.2082	12.8323	48.701
alos10601	ALPSMN229763040	2010-05-18	ALAV2A102273040	2007-12-26	0.174711	0	5589	5323	5456.16	5459	Mangde	22.9094	24.8393	19.9336	246.022
alos10602	ALPSMN229763040	2010-05-18	ALAV2A102273040	2007-12-26	3.77048	0	5862	5308	5543.34	5534	Pho	13.8562	16.4564	11.0919	290.503
alos10603	ALPSMN229763040	2010-05-18	ALAV2A102273040	2007-12-26	0.139411	0	5552	5299	5392.82	5382	Mangde	23.7032	25.4367	26.431	115.185
alos10604	ALPSMN229763040	2010-05-18	ALAV2A102273040	2007-12-26	0.374153	0	5344	5176	5244.28	5243	Mangde	15.5935	16.9097	13.8577	255.147
alos10605	ALPSMN229763040	2010-05-18	ALAV2A102273040	2007-12-26	0.0304793	0	5482	5381	5428.94	5431	Mangde	32.2514	33.271	29.9562	321.939
alos10606	ALPSMN229763040	2010-05-18	ALAV2A102273040	2007-12-26	0.107426	0	5402	5170	5300.04	5312	Mangde	31.3119	31.6817	30.354	12.8733
alos10607	ALPSMN229763040	2010-05-18	ALAV2A102273040	2007-12-26	0.026602	0	5509	5405	5454.43	5442	Mangde	25.6603	27.7649	25.1426	48.5564
alos10608	ALPSMN212113030	2010-01-17	ALAV2A212113030	2010-01-17	3.9147	0.468087	6860	5688	6160.92	6171	Kuri	23.1788	23.7792	22.7342	48.4549
alos10609	ALPSMN229763040	2010-05-18	ALAV2A102273040	2007-12-26	0.0191181	0	5567	5494	5537.09	5539	Mangde	22.378	16.6175	24.137	75.2473
alos10610	ALPSMN229763035	2010-05-18	ALAV2A102273040	2007-12-26	1.76187	0	5823	5346	5588.7	5603	Pho	18.3074	18.0093	17.793	254.695
alos10611	ALPSMN229763035	2010-05-18	ALAV2A102273040	2007-12-26	0.227373	0	5532	5254	5374.04	5367	Pho	19.3993	20.2819	17.2775	4.25941
alos10612	ALPSMN229763040	2010-05-18	ALAV2A102273040	2007-12-26	0.0370666	0	5490	5361	5432.63	5442	Mangde	41.6562	39.5398	44.1732	353.087
alos10613	ALPSMN229763040	2010-05-18	ALAV2A102273040	2007-12-26	0.012934	0	5538	5514	5524.93	5524	Mangde	17.9325	17.1608	17.9869	156.68
alos10614	ALPSMN229763040	2010-05-18	ALAV2A102273040	2007-12-26	0.0675479	0	5560	5393	5484.27	5485	Mangde	22.2934	17.1014	23.3534	51.0569
alos10615	ALPSMN229763040	2010-05-18	ALAV2A102273040	2007-12-26	0.419052	0	5420	5241	5323.23	5313	Mangde	15.1354	15.9052	14.695	253.287
alos10616	ALPSMN229763035	2010-05-18	ALAV2A102273040	2007-12-26	0.157458	0	5498	5155	5308.43	5311	Pho	24.5834	27.2184	22.5616	34.6127
alos10617	ALPSMN229763040	2010-05-18	ALAV2A102273040	2007-12-26	1.29335	0	5429	5084	5265.82	5272	Mangde	15.4012	16.7561	14.0912	86.541
alos10618	ALPSMN229763040	2010-05-18	ALAV2A102273040	2007-12-26	1.12242	0	5871	5420	5631.4	5624	Mangde	17.1281	16.5781	17.8617	209.474
alos10619	ALPSMN229763035	2010-05-18	ALAV2A102273040	2007-12-26	0.129958	0	5378	5193	5253.34	5243	Pho	24.7755	33.4756	15.3412	2.93194
alos10620	ALPSMN229763040	2010-05-18	ALAV2A102273040	2007-12-26	0.353929	0	5385	5158	5271.56	5272	Mangde	17.7232	17.5229	18.3758	194.978
alos10621	ALPSMN229763040	2010-05-18	ALAV2A102273040	2007-12-26	0.453935	0	5445	5111	5298.29	5301	Mangde	21.0735	22.0249	20.2317	78.7758
alos10622	ALPSMN212113030	2010-01-17	ALAV2A212113030	2010-01-17	0.108273	0	6120	5832	5970.79	5967	Kuri	26.0495	33.9488	20.2323	327.974
alos10623	ALPSMN229763040	2010-05-18	ALAV2A102273040	2007-12-26	0.0343569	0	5658	5532	5583.54	5581	Mangde	29.3333	33.759	25.9478	293.272
alos10624	ALPSMN229763040	2010-05-18	ALAV2A102273040	2007-12-26	0.143366	0	5779	5455	5641.39	5665	Mangde	29.9511	25.1625	36.2996	187.874
alos10625	ALPSMN229763035	2010-05-18	ALAV2A102273040	2007-12-26	0.24657	0	5443	5174	5266.33	5260	Pho	21.5459	26.7968	16.1094	345.326
alos10626	ALPSMN229763040	2010-05-18	ALAV2A102273040	2007-12-26	0.0323994	0	5348	5234	5306.46	5320	Mangde	20.4272	16.022	21.783	159.957
alos10627	ALPSMN212113030	2010-01-17	ALAV2A212113030	2010-01-17	2.38021	0.365578	6890	5722	6271.78	6295	Kuri	20.6257	23.8465	17.227	70.1746
alos10628	ALPSMN229763040	2010-05-18	ALAV2A102273040	2007-12-26	0.0384251	0	5754	5585	5659.22	5657	Mangde	27.9535	28.7931	29.4887	131.384
alos10629	ALPSMN229763035	2010-05-18	ALAV2A102273040	2007-12-26	0.720282	0	5796	5458	5682.22	5705	Mangde	17.3855	16.1512	18.0624	80.1473
alos10630	ALPSMN229763040	2010-05-18	ALAV2A102273040	2007-12-26	0.405795	0	5883	5445	5608.52	5547	Mangde	20.7624	26.2633	16.3763	115.015
alos10631	ALPSMN229763040	2010-05-18	ALAV2A102273040	2007-12-26	0.0230376	0	5703	5590	5622.84	5617	Mangde	17.1773	21.9719	16.591	145.58
alos10632	ALPSMN229763040	2010-05-18	ALAV2A102273040	2007-12-26	0.0233839	0	5508	5433	5471.81	5474	Mangde	26.067	25.7836	26.0584	341.389
alos10633	ALPSMN212113030	2010-01-17	ALAV2A212113030	2010-01-17	0.489414	0	6259	5836	6020.38	5998	Kuri	27.3929	29.7495	25.2626	20.0974
alos10634	ALPSMN229763035	2010-05-18	ALAV2A102273040	2007-12-26	2.10943	0	5812	5245	5598.67	5632	Mangde	16.8945	14.673	18.6592	74.6631
alos10635	ALPSMN229763035	2010-05-18	ALAV2A102273040	2007-12-26	0.111571	0	5369	5231	5282.78	5274	Pho	21.6653	31.5952	12.3077	351.934
alos10636	ALPSMN229763040	2010-05-18	ALAV2A102273040	2007-12-26	0.360844	0	5826	5384	5636.33	5652	Mangde	17.1945	16.6272	18.4991	142.325
alos10637	ALPSMN229763040	2010-05-18	ALAV2A102273040	2007-12-26	0.0147013	0	5339	5300	5315.33	5316	Mangde	17.4869	16.4842	22.1658	272.542
alos10638	ALPSMN212113030	2010-01-17	ALAV2A212113030	2010-01-17	1.31513	0.118026	6519	5811	6075.69	6048	Kuri	15.8251	17.9714	13.5659	52.7909
alos10639	ALPSMN212113030	2010-01-17	ALAV2A212113030	2010-01-17	0.659573	0.0192834	6456	5843	6149.09	6176	Kuri	20.531	20.794	19.7802	54.0126
alos10640	ALPSMN229763035	2010-05-18	ALAV2A102273040	2007-12-26	0.116082	0	5397	5224	5293.6	5286	Pho	24.8593	27.137	20.8869	321.28
alos10641	ALPSMN229763035	2010-05-18	ALAV2A102273040	2007-12-26	0.0636808	0	5563	5422	5508.53	5518	Mangde	27.2413	19.2752	33.7643	83.4618
alos10642	ALPSMN229763040	2010-05-18	ALAV2A102273040	2007-12-26	0.858291	0	5777	5368	5599.26	5611	Mangde	18.6555	14.6598	21.6733	91.4891
alos10643	ALPSMN229763040	2010-05-18	ALAV2A102273040	2007-12-26	0.0468095	0	5419	5263	5323.17	5317	Mangde	23.582	30.8931	15.4248	5.57847
alos10644	ALPSMN212113030	2010-01-17	ALAV2A212113030	2010-01-17	1.59815	0	6408	5770	6053.44	6021	Kuri	16.6085	18.1822	15.0264	39.8661
alos10645	ALPSMN229763035	2010-05-18	ALAV2A212113030	2010-01-17	4.57959	1.25417	6512	4684	5255.77	5268	Pho	18.1427	21.9741	13.8728	260.125
alos10646	ALPSMN229763035	2010-05-18	ALAV2A212113030	2010-01-17	3.59792	0.793372	6954	5587	6269.54	6263	Kuri	23.3001	25.2443	20.607	46.5989
alos10647	ALPSMN229763035	2010-05-18	ALAV2A212113030	2010-01-17	3.02431	0.486877	6242	5006	5585.75	5575	Pho	21.1569	25.3585	16.8525	235.442
alos10648	ALPSMN229763035	2010-05-18	ALAV2A212113030	2010-01-17	7.43373	0.74203	6966	5436	6256.21	6283	Kuri	22.9972	25.6155	20.2551	33.4421
alos10649	ALPSMN229763035	2010-05-18	ALAV2A212113030	2010-01-17	0.11177	0	6161	5827	5985.6	5972	Kuri	30.4804	38.146	22.0995	359.838
alos10650	ALPSMN229763035	2010-05-18	ALAV2A212113030	2010-01-17	1.53135	0	6794	5458	6098.52	6115	Kuri	28.7766	32.8083	24.7363	166.366
alos10651	ALPSMN229763040	2010-05-18	ALAV2A102273040	2007-12-26	0.015771	0	5441	5395	5424.32	5429	Mangde	16.2689	8.81583	21.0647	252.248
alos10652	ALPSMN229763035	2010-05-18	ALAV2A263313030	2011-01-03	48.551	11.1422	7506	4819	5820.36	5799	Kuri	18.4107	20.6205	16.2078	144.231
alos10653	ALPSMN229763040	2010-05-18	ALAV2A102273040	2007-12-26	0.0631694	0.018827	5525	5307	5415.79	5410	Mangde	29.4301	36.4094	21.5618	302.971
alos10654	ALPSMN229763035	2010-05-18	ALAV2A212113030	2010-01-17	0.351201	0	6551	5936	6236.45	6247	Kuri	35.9202	33.7392	37.611	161.56
alos10655	ALPSMN229763040	2010-05-18	ALAV2A102273040	2007-12-26	0.021383	0	5489	5353	5429.36	5436	Mangde	37.26	38.9728	34.2061	319.443
alos10656	ALPSMN229763035	2010-05-18	ALAV2A102273040	2007-12-26	3.50101	0	5971	5204	5633.89	5623	Mangde	22.8492	22.8653	22.5561	216.667
alos10657	ALPSMN229763040	2010-05-18	ALAV2A102273040	2007-12-26	0.0437194	0	5470	5352	5422.15	5427	Mangde	24.4622	23.3011	23.3399	337.522
alos10658	ALPSMN229763040	2010-05-18	ALAV2A102273040	2007-12-26	0.242668	0	5864	5265	5582.6	5609	Mangde	26.4226	25.3307	26.3411	228.279
alos10659	ALPSMN229763035	2010-05-18	ALAV2A212113030	2010-01-17	2.04058	1.01881	6965	5082	5848.71	5552	Kuri	25.1866	34.7789	15.5993	118.59
alos10660	ALPSMN229763040	2010-05-18	ALAV2A102273040	2007-12-26	0.0509613	0	5561	5408	5484.19	5486	Mangde	32.0193	32.8733	33.7968	300.521
alos10661	ALPSMN229763040	2010-05-18	ALAV2A102273040	2007-12-26	0.271344	0	5876	5361	5570.25	5555	Mangde	25.9982	29.6778	22.0057	220.478
alos10662	ALPSMN229763040	2010-05-18	ALAV2A102273040	2007-12-26	0.294544	0	5667	5334	5492.92	5478	Mangde	19.5388	23.4691	16.0326	297.867
alos10663	ALPSMN229763035	2010-05-18	ALAV2A102273040	2007-12-26	0.220699	0	5794	5499	5639.5	5632	Mangde	21.1878	23.9205	17.6172	138.483
alos10664	ALPSMN229763040	2010-05-18	ALAV2A102273040	2007-12-26	0.024163	0	5569	5517	5550.68	5557	Mangde	24.4526	19.8013	27.8649	355.017
alos10665	ALPSMN229763040	2010-05-18	ALAV2A102273040	2007-12-26	0.0369509	0	5519	5396	5453.25	5449	Mangde	36.0626	38	29.8386	331.111
alos10666	ALPSMN229763040	2010-05-18	ALAV2A102273040	2007-12-26	0.194288	0	5533	5245	5410.3	5418	Mangde	23.0126	22.0223	24.1712	300.822
alos10667	ALPSMN229763040	2010-05-18	ALAV2A102273040	2007-12-26	0.306763	0	5876	5402	5696.81	5734	Mangde	29.5983	28.4156	30.4911	201.8
alos10668	ALPSMN229763040	2010-05-18	ALAV2A102273040	2007-12-26	0.0646254	0	5554	5398	5467.29	5469	Mangde	23.1363	24.3234	24.5504	319.455
alos10669	ALPSMN229763040	2010-05-18	ALAV2A102273040	2007-12-26	0.144225	0	5525	5301	5434.64	5464	Mangde	20.5862	16.6242	24.9708	168.317
alos10670	ALPSMN229763040	2010-05-18	ALAV2A102273040	2007-12-26	0.0454599	0	5559	5425	5480.23	5476	Mangde	23.9792	27.0288	22.1357	318.503
alos10671	ALPSMN229763040	2010-05-18	ALAV2A102273040	2007-12-26	0.261404	0	5657	5358	5475.63	5457	Mangde	22.7542	26.9371	19.714	301.228
alos10672	ALPSMN229763040	2010-05-18	ALAV2A102273040	2007-12-26	1.06691	0	5625	5318	5503.17	5503	Mangde	19.0768	15.7081	22.5018	204.608
alos10673	ALPSMN229763035	2010-05-18	ALAV2A102273040	2007-12-26	6.72023	0.813284	5961	5204	5523.15	5489	Mangde	17.4294	19.0579	15.8877	239.495
alos10674	ALPSMN229763040	2010-05-18	ALAV2A102273040	2007-12-26	0.0105095	0	5532	5489	5512.36	5513	Mangde	22.1879	16.1245	28.6309	27.1084
alos10675	ALPSMN229763040	2010-05-18	ALAV2A102273040	2007-12-26	0.182658	0	5544	5336	5451.48	5438	Mangde	19.7391	18.4776	20.6646	264.2
alos10676	ALPSMN229763035	2010-05-18	ALAV2A263313030	2011-01-03	0.206334	0	5963	5424	5685.97	5699	Kuri	36.7157	35.1639	37.4937	330.22
alos10677	ALPSMN229763040	2010-05-18	ALAV2A102273040	2007-12-26	0.0173831	0	5445	5407	5428.47	5429	Mangde	14.8743	13.6453	18.615	346.1
alos10678	ALPSMN229763035	2010-05-18	ALAV2A263313030	2011-01-03	0.739144	0	6544	5554	6055.38	6052	Kuri	26.0086	27.9415	24.7697	308.243
alos10679	ALPSMN229763040	2010-05-18	ALAV2A102273040	2007-12-26	0.318835	0	5539	5269	5416.74	5416	Mangde	19.2251	17.1168	20.1832	39.9672
alos10680	ALPSMN229763040	2010-05-18	ALAV2A102273040	2007-12-26	0.0813131	0	5378	5250	5341.2	5345	Mangde	20.225	15.5973	26.0107	284.594
alos10681	ALPSMN229763035	2010-05-18	ALAV2A263313030	2011-01-03	0.165048	0	6119	5558	5869.3	5910	Kuri	37.6196	40.1741	34.2201	264.547
alos10682	ALPSMN229763040	2010-05-18	ALAV2A102273040	2007-12-26	1.06229	0	5593	5297	5473.88	5478	Mangde	16.7468	17.4471	16.1146	268.707
alos10683	ALPSMN229763040	2010-05-18	ALAV2A102273040	2007-12-26	0.113563	0	5700	5496	5626.33	5641	Mangde	31.9579	23.1457	41.3478	185.854
alos10684	ALPSMN229763040	2010-05-18	ALAV2A102273040	2007-12-26	0.110271	0	5461	5271	5395.59	5403	Mangde	22.8044	19.1226	24.0901	102.65
alos10685	ALPSMN229763040	2010-05-18	ALAV2A102273040	2007-12-26	0.302025	0	5543	5203	5399.63	5411	Mangde	21.1246	20.9772	19.7941	8.72152
alos10686	ALPSMN229763040	2010-05-18	ALAV2A102273040	2007-12-26	0.92017	0	5675	5289	5447.65	5442	Mangde	20.6151	22.3707	19.3738	158.83
alos10687	ALPSMN229763035	2010-05-18	ALAV2A263313030	2011-01-03	0.699664	0	6107	5286	5697.04	5679	Kuri	36.1329	41.5676	30.3516	352.045
alos10688	ALPSMN229763035	2010-05-18	ALAV2A102273040	2007-12-26	1.67438	0.0203556	5675	5319	5472.14	5479	Mangde	15.5004	15.0309	16.107	156.032
alos10689	ALPSMN229763040	2010-05-18	ALAV2A102273040	2007-12-26	3.25627	0	5645	5236	5439.74	5438	Mangde	15.0661	15.8979	14.4189	37.8876
alos10690	ALPSMN229763040	2010-05-18	ALAV2A102273040	2007-12-26	0.10534	0	5467	5249	5393.05	5409	Mangde	22.1987	16.1786	25.7036	15.5861
alos10691	ALPSMN229763040	2010-05-18	ALAV2A102273040	2007-12-26	0.608968	0	5529	5255	5397.45	5384	Mangde	15.4245	17.4889	13.5994	71.4608
alos10692	ALPSMN229763035	2010-05-18	ALAV2A263313030	2011-01-03	0.827223	0.141657	6534	5453	6051.31	6247	Kuri	24.2678	25.2342	24.0584	347.216
alos10693	ALPSMN229763040	2010-05-18	ALAV2A102273040	2007-12-26	0.682679	0	5442	5195	5314.52	5314	Mangde	16.2483	15.2908	16.934	158.075
alos10694	ALPSMN229763035	2010-05-18	ALAV2A263313030	2011-01-03	0.361864	0	6541	5978	6319.67	6351	Kuri	36.4764	33.367	38.9285	203.586
alos10695	ALPSMN229763040	2010-05-18	ALAV2A102273040	2007-12-26	0.406736	0	5670	5389	5504.5	5478	Mangde	19.5921	22.3849	16.5873	60.7698
alos10696	ALPSMN229763040	2010-05-18	ALAV2A102273040	2007-12-26	0.0379289	0	5327	5254	5287.7	5288	Mangde	17.2587	19.0114	11.923	284.577
alos10697	ALPSMN229763035	2010-05-18	ALAV2A102273040	2007-12-26	0.303431	0	5644	5446	5531.54	5516	Mangde	19.8082	24.3116	14.9613	67.5277
alos10698	ALPSMN229763040	2010-05-18	ALAV2A102273040	2007-12-26	0.514257	0	5536	5329	5421.92	5422	Mangde	14.7724	17.314	12.7772	107.061
alos10699	ALPSMN229763040	2010-05-18	ALAV2A102273040	2007-12-26	0.0357357	0	5443	5364	5408.58	5413	Mangde	24.3296	19.4203	25.7492	209.055
alos10700	ALPSMN229763040	2010-05-18	ALAV2A102273040	2007-12-26	0.696407	0	5598	5295	5436.16	5438	Mangde	19.2982	18.9831	19.4824	209.789
alos10701	ALPSMN229763040	2010-05-18	ALAV2A102273040	2007-12-26	0.74522	0	5625	5352	5479.5	5481	Mangde	15.2599	17.2455	13.6968	93.8176
alos10702	ALPSMN229763035	2010-05-18	ALAV2A263313030	2011-01-03	0.29191	0	6561	5540	6080.66	6076	Kuri	42.7594	43.5907	41.6702	326.359
alos10703	ALPSMN229763035	2010-05-18	ALAV2A263313030	2011-01-03	0.394522	0	6530	5824	6192.99	6190	Kuri	30.6966	27.7178	32.1132	54.0693
alos10704	ALPSMN229763040	2010-05-18	ALAV2A102273040	2007-12-26	0.0618465	0	5524	5374	5449.84	5456	Mangde	21.3135	14.8947	24.1451	50.4836
alos10705	ALPSMN229763040	2010-05-18	ALAV2A102273040	2007-12-26	0.286126	0	5426	5152	5296.3	5296	Mangde	18.8089	20.6964	16.3497	14.9907
alos10706	ALPSMN229763040	2010-05-18	ALAV2A102273040	2007-12-26	0.267586	0	5436	5231	5326.17	5317	Mangde	18.4486	22.1282	15.1802	120.684
alos10707	ALPSMN229763035	2010-05-18	ALAV2A263313030	2011-01-03	0.446244	0	6669	5649	6330.09	6406	Kuri	34.0665	28.6254	40.1138	318.52
alos10708	ALPSMN229763035	2010-05-18	ALAV2A263313030	2011-01-03	0.114439	0	6317	5888	6094.37	6090	Kuri	43.8752	42.7137	44.5537	332.168
alos10709	ALPSMN229763040	2010-05-18	ALAV2A102273040	2007-12-26	0.190848	0	5525	5318	5413.21	5402	Mangde	14.0789	15.4511	11.8753	40.5779
alos10710	ALPSMN229763040	2010-05-18	ALAV2A102273040	2007-12-26	0.0779423	0	5311	5147	5242.95	5248	Mangde	25.2171	25.0897	24.1294	359.399
alos10711	ALPSMN229763040	2010-05-18	ALAV2A102273040	2007-12-26	0.227948	0	5471	5305	5400.23	5404	Mangde	16.9264	15.3474	18.2935	194.819
alos10712	ALPSMN229763035	2010-05-18	ALAV2A263313030	2011-01-03	0.129893	0	6273	5832	6111.89	6134	Kuri	39.7899	34.3087	46.7513	338.064
alos10713	ALPSMN229763040	2010-05-18	ALAV2A102273040	2007-12-26	0.411205	0	5500	5232	5351.97	5344	Mangde	14.8012	15.096	14.0442	58.1215
alos10714	ALPSMN229763040	2010-05-18	ALAV2A102273040	2007-12-26	0.295822	0	5298	5086	5164.52	5158	Mangde	18.0221	20.9663	15.4096	22.6386
alos10715	ALPSMN229763035	2010-05-18	ALAV2A263313030	2011-01-03	0.222693	0	6231	5606	5912.45	5886	Kuri	39.8572	40.1204	39.5507	334.935
alos10716	ALPSMN229763040	2010-05-18	ALAV2A102273040	2007-12-26	0.0433444	0	5434	5351	5404.42	5412	Mangde	18.6786	11.5308	24.606	115.474
alos10717	ALPSMN229763040	2010-05-18	ALAV2A102273040	2007-12-26	0.114617	0	5443	5253	5376.71	5383	Mangde	17.8847	14.1343	20.3092	53.6076
alos10718	ALPSMN229763040	2010-05-18	ALAV2A102273040	2007-12-26	0.0168361	0	5507	5459	5483.58	5486	Mangde	26.1653	19.5921	32.2512	26.7964
alos10719	ALPSMN229763035	2010-05-18	ALAV2A263313030	2011-01-03	1.45372	0	6657	5697	6165.29	6200	Kuri	25.1156	24.5035	25.7629	45.5188
alos10720	ALPSMN229763040	2010-05-18	ALAV2A102273040	2007-12-26	0.206291	0	5394	5244	5320.32	5319	Mangde	14.8023	18.0754	10.3806	351.7
alos10721	ALPSMN263313040	2011-01-03	ALAV2A102273040	2007-12-26	0.0172003	0	5232	5136	5197	5203	Mangde	24.936	18.954	29.1402	17.136
alos10722	ALPSMN229763035	2010-05-18	ALAV2A263313030	2011-01-03	2.82845	0.122756	6993	5401	6051.82	6065	Kuri	22.3188	26.2566	18.6375	22.1296
alos10723	ALPSMN263313040	2011-01-03	ALAV2A102273040	2007-12-26	0.135381	0	5167	4907	5062.2	5056	Mangde	21.2564	22.9268	20.2844	76.7607
alos10724	ALPSMN263313035	2011-01-03	ALAV2A263313030	2011-01-03	32.7356	17.3168	6710	4665	5361.34	5396	Mangde	16.1447	18.5959	13.4789	193.495
alos10725	ALPSMN229763035	2010-05-18	ALAV2A263313030	2011-01-03	0.0604773	0	6072	5852	5987.35	6001	Kuri	29.1635	24.4327	32.5876	5.07031
alos10726	ALPSMN229763035	2010-05-18	ALAV2A263313030	2011-01-03	2.05335	0	6618	5638	6168.16	6180	Kuri	20.4175	23.8056	17.2369	78.5787
alos10727	ALPSMN229763035	2010-05-18	ALAV2A263313030	2011-01-03	0.397189	0.166152	6336	5623	5957.38	5929	Kuri	26.4975	33.1883	19.7069	17.8347
alos10728	ALPSMN263313035	2011-01-03	ALAV2A263313030	2011-01-03	1.00104	0.0629811	5489	5149	5309.22	5307	Mangde	18.095	18.1752	17.8337	179.052
alos10729	ALPSMN229763035	2010-05-18	ALAV2A263313030	2011-01-03	0.665225	0.408425	6093	5253	5575.83	5531	Kuri	23.1636	32.2759	14.4607	316.545
alos10730	ALPSMN229763035	2010-05-18	ALAV2A263313030	2011-01-03	0.528437	0	6373	5869	6085.95	6082	Kuri	22.0419	19.6171	23.9501	63.9484
alos10731	ALPSMN229763035	2010-05-18	ALAV2A263313030	2011-01-03	0.47655	0	6682	6314	6515.72	6514	Kuri	29.9876	26.8936	35.1155	207.579
alos10732	ALPSMN229763035	2010-05-18	ALAV2A263313030	2011-01-03	0.114568	0	6291	5843	6067.44	6069	Kuri	28.5628	28.0018	29.6305	301.637
alos10733	ALPSMN229763035	2010-05-18	ALAV2A263313030	2011-01-03	0.156229	0	6348	5850	6103.05	6078	Kuri	30.9921	35.6847	27.9921	297.324
alos10734	ALPSMN229763035	2010-05-18	ALAV2A263313030	2011-01-03	0.511464	0	6303	5722	6000.98	5994	Kuri	27.9772	29.8068	24.9653	303.874
alos10735	ALPSMN229763035	2010-05-18	ALAV2A263313030	2011-01-03	0.711653	0.289271	6700	5433	6139.44	6382	Kuri	21.548	22.101	20.0419	286.156
alos10736	ALPSMN229763035	2010-05-18	ALAV2A263313030	2011-01-03	0.664348	0	6481	5718	6132.5	6153	Kuri	27.5985	30.293	25.2839	335.499
alos10737	ALPSMN229763035	2010-05-18	ALAV2A263313030	2011-01-03	0.217711	0	6285	5841	6077.92	6117	Kuri	27.2515	20.7955	33.5354	331.598
alos10738	ALPSMN263313035	2011-01-03	ALAV2A263313030	2011-01-03	26.4145	5.62392	7499	5245	6133.49	6007	Kuri	18.2352	22.9617	13.2986	33.7708
alos10739	ALPSMN229763035	2010-05-18	ALAV2A263313030	2011-01-03	0.667054	0.228832	6545	5584	6081.96	6155	Kuri	25.1583	26.0964	23.5177	286.371
alos10740	ALPSMN229763035	2010-05-18	ALAV2A263313030	2011-01-03	0.175093	0	6139	5760	5963.9	5976	Kuri	35.714	35.5769	35.6367	357.301
alos10741	ALPSMN229763035	2010-05-18	ALAV2A263313030	2011-01-03	4.78107	1.72358	6917	5376	5999.7	6017	Kuri	21.7813	26.2666	16.9323	302.245
alos10742	ALPSMN229763035	2010-05-18	ALAV2A263313030	2011-01-03	0.761831	0	6739	5881	6465.52	6524	Kuri	30.8029	25.215	36.7508	257.409
alos10743	ALPSMN229763035	2010-05-18	ALAV2A263313030	2011-01-03	0.0418677	0	5900	5735	5809.24	5802	Kuri	23.0557	25.4848	21.5647	0.229183
alos10744	ALPSMN229763035	2010-05-18	ALAV2A263313030	2011-01-03	1.65369	0	6297	5655	5987.23	6006	Kuri	18.3381	18.1073	18.3792	42.4899
alos10745	ALPSMN229763035	2010-05-18	ALAV2A263313030	2011-01-03	2.21799	0.219845	6632	5641	6068.32	6057	Kuri	21.7591	24.2171	19.0847	19.2218
alos10746	ALPSMN263313035	2011-01-03	ALAV2A263313030	2011-01-03	6.33906	0.199101	6676	5643	6149.93	6136	Kuri	17.3582	21.7063	12.9474	95.2983
alos10747	ALPSMN229763030	2010-05-18	ALAV2A263313030	2011-01-03	0.526141	0	6114	5505	5796.19	5789	Kuri	29.873	35.4079	25.5543	346.174
alos10748	ALPSMN229763030	2010-05-18	ALAV2A263313030	2011-01-03	0.126879	0	6108	5922	6024.86	6046	Kuri	25.4574	20.3035	31.4146	77.2703
alos10749	ALPSMN263313035	2011-01-03	ALAV2A102273040	2007-12-26	0.0189502	0	5264	5219	5251.05	5255	Mangde	16.017	9.30092	24.2192	264.976
alos10750	ALPSMN229763035	2010-05-18	ALAV2A263313030	2011-01-03	0.136858	0	6410	6081	6265.91	6269	Kuri	37.7632	35.6753	39.2395	166.24
alos10751	ALPSMN263313035	2011-01-03	ALAV2A102273040	2007-12-26	0.237341	0	5705	5328	5483.69	5474	Mangde	29.1688	31.5291	26.8906	194.25
alos10752	ALPSMN229763030	2010-05-18	ALAV2A263313030	2011-01-03	0.230852	0	6000	5723	5846.95	5835	Kuri	21.4161	25.4548	17.4182	41.1444
alos10753	ALPSMN263313035	2011-01-03	ALAV2A263313030	2011-01-03	1.17663	0	6356	5759	6036.87	6021	Kuri	20.2411	23.6126	16.7758	152.545
alos10754	ALPSMN263313040	2011-01-03	ALAV2A102273040	2007-12-26	0.0647516	0	5336	5211	5292.23	5298	Mangde	20.1092	14.3124	27.3574	269.681
alos10755	ALPSMN263313035	2011-01-03	ALAV2A102273040	2007-12-26	0.0283655	0	5472	5364	5412.82	5410	Chamkhar	32.1169	34.2381	27.6348	10.6666
alos10756	ALPSMN229763035	2010-05-18	ALAV2A263313030	2011-01-03	0.290189	0	6403	5934	6134.38	6130	Kuri	36.8786	36.0885	39.393	85.1429
alos10757	ALPSMN263313035	2011-01-03	ALAV2A102273040	2007-12-26	0.222635	0	5684	5363	5567.55	5583	Chamkhar	34.3519	27.8058	38.3697	102.542
alos10758	ALPSMN263313035	2011-01-03	ALAV2A263313030	2011-01-03	0.921949	0	6327	5826	6037	6013	Kuri	17.9722	20.2723	15.1106	126.839
alos10759	ALPSMN263313035	2011-01-03	ALAV2A102273040	2007-12-26	0.0349277	0	5505	5347	5422.12	5419	Chamkhar	29.072	34.9993	22.86	116.973
alos10760	ALPSMN263313040	2011-01-03	ALAV2A102273040	2007-12-26	0.0741386	0	5301	5133	5219.67	5227	Mangde	21.9738	18.9415	23.4658	317.586
alos10761	ALPSMN263313040	2011-01-03	ALAV2A102273040	2007-12-26	0.237971	0	5347	5157	5233.44	5221	Mangde	17.1148	18.5996	14.6738	164.65
alos10762	ALPSMN263313035	2011-01-03	ALAV2A263313030	2011-01-03	0.176572	0	6165	5931	6048.67	6044	Kuri	24.2589	26.1269	22.9793	53.1537
alos10763	ALPSMN263313035	2011-01-03	ALAV2A102273040	2007-12-26	0.0737959	0	5449	5319	5399.39	5408	Chamkhar	17.5932	13.6789	21.0478	55.8066
alos10764	ALPSMN263313035	2011-01-03	ALAV2A263313030	2011-01-03	0.360307	0	6146	5911	6063.41	6087	Kuri	17.7813	15.172	20.1236	60.3475
alos10765	ALPSMN263313035	2011-01-03	ALAV2A263313030	2011-01-03	0.518755	0	6091	5741	5955.06	5944	Kuri	18.9076	20.3193	16.4778	359.008
alos10766	ALPSMN263313035	2011-01-03	ALAV2A102273040	2007-12-26	0.878053	0	5559	5245	5383.65	5385	Chamkhar	16.0658	17.0608	14.7631	225.264
alos10767	ALPSMN263313040	2011-01-03	ALAV2A102273040	2007-12-26	0.142714	0	5345	5160	5248.77	5254	Mangde	20.6563	17.8581	23.3713	294.527
alos10768	ALPSMN263313035	2011-01-03	ALAV2A263313030	2011-01-03	6.30917	0.591897	6733	5483	5965.05	5932	Kuri	19.2165	21.1588	17.2737	340.229
alos10769	ALPSMN263313040	2011-01-03	ALAV2A102273040	2007-12-26	0.0611323	0	5380	5243	5321.22	5333	Mangde	22.3735	17.7182	24.0261	348.112
alos10770	ALPSMN263313035	2011-01-03	ALAV2A263313030	2011-01-03	6.16808	1.08521	6343	5539	5884.38	5903	Kuri	14.017	16.7268	11.2683	98.7202
alos10771	ALPSMN263313040	2011-01-03	ALAV2A102273040	2007-12-26	0.169829	0	5333	5165	5259.92	5267	Mangde	18.3831	15.2822	21.8765	119.488
alos10772	ALPSMN263313035	2011-01-03	ALAV2A263313030	2011-01-03	0.68915	0	6261	5760	5899.13	5882	Kuri	17.0893	19.3947	15.0982	116.607
alos10773	ALPSMN263313040	2011-01-03	ALAV2A102273040	2007-12-26	0.0159025	0	5348	5263	5303.06	5298	Chamkhar	32.6214	38.4888	24.7843	309.663
alos10774	ALPSMN263313035	2011-01-03	ALAV2A263313030	2011-01-03	0.320509	0	6056	5814	5927.89	5926	Kuri	17.8735	16.2866	18.9878	135.745
alos10775	ALPSMN263313035	2011-01-03	ALAV2A263313030	2011-01-03	0.172758	0	6057	5729	5895.22	5903	Kuri	23.95	19.7738	28.438	72.0289
alos10776	ALPSMN263313040	2011-01-03	ALAV2A102273040	2007-12-26	0.0839497	0	5411	5237	5338.56	5342	Mangde	26.5248	22.5687	31.0089	288.295
alos10777	ALPSMN263313035	2011-01-03	ALAV2A102273040	2007-12-26	0.349111	0	5514	5263	5411.04	5417	Chamkhar	18.4174	15.9225	21.406	71.4961
alos10778	ALPSMN263313035	2011-01-03	ALAV2A263313030	2011-01-03	13.0613	7.60045	6062	4677	5134.47	5067	Chamkhar	19.6041	28.0198	11.1582	144.275
alos10779	ALPSMN263313035	2011-01-03	ALAV2A263313030	2011-01-03	5.71764	0.310474	6883	5549	5951.5	5902	Kuri	17.4536	22.5456	12.2595	127.768
alos10780	ALPSMN263313035	2011-01-03	ALAV2A263313030	2011-01-03	0.107467	0	6251	5946	6116.32	6114	Kuri	27.2614	24.5073	28.3932	358.412
alos10781	ALPSMN263313035	2011-01-03	ALAV2A263313030	2011-01-03	3.4017	0	6443	5465	5904.78	5908	Kuri	25.4271	27.4007	23.3252	1.41977
alos10782	ALPSMN263313040	2011-01-03	ALAV2A102273040	2007-12-26	0.552245	0	5520	5125	5334.58	5333	Mangde	20.0252	18.2745	21.1223	287.734
alos10783	ALPSMN263313035	2011-01-03	ALAV2A263313030	2011-01-03	0.151047	0	6091	5885	6003.96	6008	Kuri	24.7054	21.3292	28.937	232.696
alos10784	ALPSMN263313035	2011-01-03	ALAV2A102273040	2007-12-26	0.0891555	0	5481	5364	5446.6	5454	Chamkhar	19.5963	13.1961	26.1206	197.117
alos10785	ALPSMN263313035	2011-01-03	ALAV2A263313030	2011-01-03	0.25104	0	6097	5770	5918.38	5913	Kuri	23.1262	24.3787	21.655	94.7499
alos10786	ALPSMN263313040	2011-01-03	ALAV2A102273040	2007-12-26	0.0613164	0	5460	5302	5368.02	5355	Mangde	22.7091	28.3032	17.3285	325.585
alos10787	ALPSMN263313035	2011-01-03	ALAV2A263313030	2011-01-03	0.965406	0	6297	5762	5973.2	5981	Kuri	20.846	19.8513	21.8436	122.066
alos10788	ALPSMN263313040	2011-01-03	ALAV2A102273040	2007-12-26	0.021689	0	5419	5352	5386	5386	Chamkhar	22.0215	23.9729	18.475	10.1294
alos10789	ALPSMN263313035	2011-01-03	ALAV2A102273040	2007-12-26	0.0880751	0	5465	5330	5416.38	5421	Chamkhar	21.2459	16.5738	27.243	219.792
alos10790	ALPSMN263313035	2011-01-03	ALAV2A102273040	2007-12-26	0.0477327	0	5399	5314	5341.19	5339	Chamkhar	20.3732	19.9295	22.7433	339.803
alos10791	ALPSMN263313035	2011-01-03	ALAV2A102273040	2007-12-26	0.0244356	0	5458	5386	5423.26	5425	Chamkhar	21.5995	19.5162	21.1023	1.04713
alos10792	ALPSMN263313030	2011-01-03	ALAV2A263313030	2011-01-03	0.247356	0	6196	5762	5991.04	5991	Kuri	36.1436	37.5716	35.1055	346.291
alos10793	ALPSMN263313040	2011-01-03	ALAV2A102273040	2007-12-26	0.0828261	0	5400	5185	5291.04	5287	Chamkhar	32.1055	35.8947	28.1653	19.619
alos10794	ALPSMN263313030	2011-01-03	ALAV2A263313030	2011-01-03	0.05348	0	5983	5765	5889.27	5894	Kuri	37.3486	35.027	38.9222	328.282
alos10795	ALPSMN263313035	2011-01-03	ALAV2A263313030	2011-01-03	0.824865	0	6161	5687	5888.25	5882	Kuri	18.551	18.3863	18.6802	68.0816
alos10796	ALPSMN263313035	2011-01-03	ALAV2A102273040	2007-12-26	0.055836	0	5299	5213	5251.8	5251	Chamkhar	13.2534	12.2113	12.5745	159.589
alos10797	ALPSMN263313030	2011-01-03	ALAV2A263313030	2011-01-03	1.28583	0.0196191	6702	5727	6176.97	6156	Kuri	28.1378	33.6398	22.2302	269.996
alos10798	ALPSMN263313040	2011-01-03	ALAV2A102273040	2007-12-26	0.494927	0	5496	5089	5328.75	5326	Chamkhar	21.8895	22.0928	21.3356	87.1327
alos10799	ALPSMN263313030	2011-01-03	ALAV2A263313030	2011-01-03	0.509244	0.01387	6442	5763	5982.87	5912	Kuri	21.9536	28.894	15.4467	326.158
alos10800	ALPSMN263313035	2011-01-03	ALAV2A263313030	2011-01-03	3.81065	0	6704	5646	6205.27	6233	Kuri	26.2373	28.2081	23.9846	300.096
alos10801	ALPSMN263313035	2011-01-03	ALAV2A263313030	2011-01-03	0.519976	0	6122	5703	5898.49	5884	Kuri	23.9257	27.1739	20.1107	11.6123
alos10802	ALPSMN263313030	2011-01-03	ALAV2A263313030	2011-01-03	0.49964	0	5940	5647	5789.72	5792	Kuri	22.9381	19.9237	25.3223	356.054
alos10803	ALPSMN263313035	2011-01-03	ALAV2A102273040	2007-12-26	0.282855	0	5915	5220	5578.85	5618	Chamkhar	38.9946	31.6203	45.7622	169.542
alos10804	ALPSMN263313035	2011-01-03	ALAV2A263313030	2011-01-03	0.0274651	0	5761	5691	5729.1	5731	Kuri	25.6892	20.3151	28.7097	7.03898
alos10805	ALPSMN263313035	2011-01-03	ALAV2A263313030	2011-01-03	0.891374	0	6449	5775	6000.77	5966	Kuri	20.3572	26.6214	13.8496	136.286
alos10806	ALPSMN263313035	2011-01-03	ALAV2A263313030	2011-01-03	0.332123	0	6117	5840	5969.98	5967	Kuri	18.0293	22.5566	14.3402	119.676
alos10807	ALPSMN263313035	2011-01-03	ALAV2A263313030	2011-01-03	0.269371	0	5931	5656	5800.33	5799	Kuri	20.942	21.5499	20.7361	13.1749
alos10808	ALPSMN263313035	2011-01-03	ALAV2A263313030	2011-01-03	0.0389251	0	5936	5833	5893.42	5895	Kuri	19.8053	17.1112	22.4451	92.019
alos10809	ALPSMN263313035	2011-01-03	ALAV2A263313030	2011-01-03	0.1834	0	6019	5670	5873.01	5880	Kuri	26.9232	25.3442	27.0703	313.889
alos10810	ALPSMN263313035	2011-01-03	ALAV2A263313030	2011-01-03	0.378026	0	6103	5644	5910.21	5926	Kuri	26.3345	24.6588	28.4824	320.933
alos10811	ALPSMN263313035	2011-01-03	ALAV2A263313030	2011-01-03	0.900267	0	6386	5392	5728.44	5668	Kuri	20.4728	21.3264	19.0642	116.717
alos10812	ALPSMN263313035	2011-01-03	ALAV2A263313030	2011-01-03	4.1128	0	6698	5681	6140.57	6116	Kuri	19.8481	24.207	15.6917	130.134
alos10813	ALPSMN263313035	2011-01-03	ALAV2A102273040	2007-12-26	0.432755	0.32193	5604	5108	5268.45	5194	Chamkhar	21.8413	28.5731	15.4157	159.856
alos10814	ALPSMN263313030	2011-01-03	ALAV2A263313030	2011-01-03	2.10128	0.3558	6671	5497	5841.68	5851	Kuri	23.9612	24.7573	23.4929	352.921
alos10815	ALPSMN263313035	2011-01-03	ALAV2A263313030	2011-01-03	0.0607127	0	5943	5803	5884.16	5887	Kuri	32.3815	30.8763	32.4881	23.6543
alos10816	ALPSMN263313035	2011-01-03	ALAV2A263313030	2011-01-03	0.268067	0	6089	5641	5841.36	5836	Kuri	25.2254	30.2793	20.5831	0.810291
alos10817	ALPSMN263313040	2011-01-03	ALAV2A102273040	2007-12-26	0.249289	0	5429	4942	5097.85	5013	Mangde	16.1295	22.2015	10.9777	145.706
alos10818	ALPSMN263313035	2011-01-03	ALAV2A263313030	2011-01-03	12.7394	2.46365	6490	4877	5460.3	5417	Kuri	16.2355	21.1323	11.3394	78.4886
alos10819	ALPSMN263313040	2011-01-03	ALAV2A102273040	2007-12-26	0.194694	0	5445	5046	5240.6	5257	Chamkhar	33.1577	28.0154	38.2018	353.676
alos10820	ALPSMN263313030	2011-01-03	ALAV2A263313030	2011-01-03	0.0952415	0	5996	5656	5814.31	5809	Kuri	35.7833	38.0878	34.15	324.973
alos10821	ALPSMN263313035	2011-01-03	ALAV2A102273040	2007-12-26	0.207645	0	5548	5212	5404.03	5413	Chamkhar	27.3584	28.0241	27.8703	254.772
alos10822	ALPSMN263313035	2011-01-03	ALAV2A263313030	2011-01-03	0.129255	0	6048	5871	5951.45	5948	Kuri	20.2974	25.3169	15.6957	203.319
alos10823	ALPSMN263313030	2011-01-03	ALAV2A263313030	2011-01-03	2.94037	0.285312	6692	5477	5949.81	5892	Kuri	22.6811	29.3048	16.2333	9.44066
alos10824	ALPSMN263313035	2011-01-03	ALAV2A263313030	2011-01-03	8.30292	0.472343	6435	5045	5703.79	5683	Kuri	21.9444	25.4326	18.1912	7.05113
alos10825	ALPSMN263313040	2011-01-03	ALAV2A102273040	2007-12-26	0.113836	0	5394	5069	5261.06	5265	Chamkhar	29.3361	29.1701	29.1011	10.0935
alos10826	ALPSMN263313030	2011-01-03	ALAV2A263313030	2011-01-03	8.05194	0.56427	6691	5450	5954.54	5916	Kuri	21.8764	24.4828	18.9201	232.055
alos10827	ALPSMN263313035	2011-01-03	ALAV2A102273040	2007-12-26	0.115551	0	5684	5335	5507.88	5531	Chamkhar	24.2301	15.678	33.0048	204.061
alos10828	ALPSMN263313035	2011-01-03	ALAV2A263313030	2011-01-03	0.453823	0	5852	5406	5679.21	5704	Kuri	21.5625	18.8866	23.2278	124.325
alos10829	ALPSMN263313035	2011-01-03	ALAV2A102273040	2007-12-26	0.760093	0	5796	5147	5534.89	5565	Chamkhar	22.4565	19.061	26.6438	251.824
alos10830	ALPSMN263313040	2011-01-03	ALAV2A102273040	2007-12-26	0.335889	0	5437	5104	5231.01	5220	Mangde	20.9097	21.1079	20.0762	195.76
alos10831	ALPSMN263313040	2011-01-03	ALAV2A102273040	2007-12-26	0.265258	0	5440	5000	5246.28	5260	Chamkhar	29.601	22.0293	35.9093	342.704
alos10832	ALPSMN263313035	2011-01-03	ALAV2A102273040	2007-12-26	0.255281	0	5801	5312	5564.15	5551	Chamkhar	24.6743	21.3483	27.273	206.606
alos10833	ALPSMN263313035	2011-01-03	ALAV2A263313030	2011-01-03	0.753287	0	6036	5657	5841.92	5844	Kuri	18.0485	17.6476	18.454	91.4853
alos10834	ALPSMN263313040	2011-01-03	ALAV2A102273040	2007-12-26	0.0596098	0	5323	5116	5206.44	5205	Mangde	28.9982	32.1085	21.2863	230.847
alos10835	ALPSMN263313030	2011-01-03	ALAV2A263313030	2011-01-03	0.0311016	0	5864	5768	5814.18	5817	Kuri	21.662	21.9071	16.8492	300.118
alos10836	ALPSMN263313040	2011-01-03	ALAV2A102273040	2007-12-26	0.038249	0	5433	5301	5362.98	5362	Mangde	29.6027	28.6379	31.2962	154.387
alos10837	ALPSMN263313035	2011-01-03	ALAV2A263313030	2011-01-03	0.310106	0	5808	5423	5656.15	5660	Kuri	26.0042	26.6414	25.2971	128.163
alos10838	ALPSMN263313035	2011-01-03	ALAV2A102273040	2007-12-26	0.409586	0	5675	5297	5504.41	5506	Chamkhar	21.0672	23.1169	19.3054	185.435
alos10839	ALPSMN263313030	2011-01-03	ALAV2A263313030	2011-01-03	0.0626883	0	5939	5792	5852.54	5842	Kuri	16.5686	21.8173	11.8202	303.645
alos10840	ALPSMN263313040	2011-01-03	ALAV2A102273040	2007-12-26	0.0269968	0	5238	5096	5161.1	5164	Mangde	32.6746	35.069	28.8271	333.944
alos10841	ALPSMN263313040	2011-01-03	ALAV2A102273040	2007-12-26	0.165095	0	5276	5132	5209.09	5219	Chamkhar	22.0062	23.4393	21.9313	63.1259
alos10842	ALPSMN263313030	2011-01-03	ALAV2A263313030	2011-01-03	0.125726	0	6069	5795	5905.44	5892	Kuri	23.1265	28.5476	18.3031	299.113
alos10843	ALPSMN263313035	2011-01-03	ALAV2A102273040	2007-12-26	0.559764	0	5585	5282	5429.44	5433	Chamkhar	17.0007	17.4312	16.2292	253.27
alos10844	ALPSMN263313035	2011-01-03	ALAV2A102273040	2007-12-26	0.18962	0.0631599	5414	5175	5293.08	5314	Chamkhar	21.4849	19.8185	24.5626	330.762
alos10845	ALPSMN263313030	2011-01-03	ALAV2A263313030	2011-01-03	0.13886	0	6073	5693	5846.77	5831	Kuri	28.4061	29.9291	27.6455	318.808
alos10846	ALPSMN263313035	2011-01-03	ALAV2A102273040	2007-12-26	0.288176	0.119923	5492	5183	5313.55	5306	Chamkhar	24.3324	25.4001	23.0131	322.495
alos10847	ALPSMN263313030	2011-01-03	ALAV2A263313030	2011-01-03	0.791471	0	6197	5542	5860.66	5839	Kuri	24.2412	29.3655	19.3638	327.869
alos10848	ALPSMN263313035	2011-01-03	ALAV2A263313030	2011-01-03	1.8188	0	6052	5454	5769.45	5785	Kuri	18.9487	17.9742	19.8956	188.992
alos10849	ALPSMN263313035	2011-01-03	ALAV2A263313030	2011-01-03	1.17322	0	5660	5173	5386.05	5389	Kuri	16.8587	20.1268	13.7209	85.7174
alos10850	ALPSMN263313040	2011-01-03	ALAV2A102273040	2007-12-26	0.0536729	0	5199	5069	5149.8	5161	Mangde	18.9077	17.2352	20.9171	296.916
alos10851	ALPSMN263313040	2011-01-03	ALAV2A102273040	2007-12-26	0.219269	0	5379	5095	5251.23	5253	Mangde	21.7351	22.6572	19.9502	260.269
alos10852	ALPSMN263313040	2011-01-03	ALAV2A102273040	2007-12-26	0.334787	0	5280	5077	5190.69	5192	Chamkhar	22.541	22.6547	21.673	340.018
alos10853	ALPSMN263313030	2011-01-03	ALAV2A263313030	2011-01-03	0.0371321	0	5913	5830	5859.83	5854	Kuri	16.4446	20.4515	13.8278	337.79
alos10854	ALPSMN263313030	2011-01-03	ALAV2A263313030	2011-01-03	0.0411889	0	5875	5740	5791.98	5787	Kuri	23.6608	29.567	16.9658	346.137
alos10855	ALPSMN263313030	2011-01-03	ALAV2A263313030	2011-01-03	5.44757	0.298157	6664	5467	5850.9	5802	Kuri	19.6472	24.2172	15.2006	131.697
alos10856	ALPSMN263313035	2011-01-03	ALAV2A102273040	2007-12-26	0.13035	0	5495	5345	5432.88	5442	Chamkhar	23.6644	23.3203	24.5901	66.4279
alos10857	ALPSMN263313035	2011-01-03	ALAV2A102273040	2007-12-26	0.289353	0	5745	5297	5575.56	5592	Kuri	21.1203	20.2193	21.9044	64.6295
alos10858	ALPSMN263313040	2011-01-03	ALAV2A102273040	2007-12-26	0.105205	0	5363	5216	5295.24	5296	Chamkhar	23.1155	25.5939	21.4585	65.3905
alos10859	ALPSMN263313035	2011-01-03	ALAV2A263313030	2011-01-03	1.7605	0	6139	5551	5789.21	5757	Kuri	16.5954	20.6333	12.5187	125.077
alos10860	ALPSMN263313035	2011-01-03	ALAV2A263313030	2011-01-03	0.196005	0	5798	5500	5655.94	5671	Kuri	27.6024	24.2825	32.8119	170.124
alos10861	ALPSMN263313040	2011-01-03	ALAV2A102273040	2007-12-26	0.16369	0	5322	5178	5227.86	5223	Chamkhar	17.7764	21.5989	14.1868	119.618
alos10862	ALPSMN263313035	2011-01-03	ALAV2A102273040	2007-12-26	1.03615	0	5770	5199	5495.79	5472	Chamkhar	16.8682	17.3662	16.6248	241.592
alos10863	ALPSMN263313035	2011-01-03	ALAV2A263313030	2011-01-03	0.387196	0	5837	5529	5712.08	5730	Kuri	20.8257	17.7472	22.9447	68.0574
alos10864	ALPSMN263313035	2011-01-03	ALAV2A263313030	2011-01-03	0.113297	0	5815	5629	5736.63	5742	Kuri	21.3689	16.516	24.6842	255.957
alos10865	ALPSMN263313040	2011-01-03	ALAV2A102273040	2007-12-26	0.0662839	0	5334	5149	5249.86	5248	Chamkhar	24.9124	23.7878	27.5802	64.4321
alos10866	ALPSMN263313035	2011-01-03	ALAV2A102273040	2007-12-26	0.797949	0	5738	5281	5525.11	5526	Chamkhar	17.8925	15.0282	20.0872	239.212
alos10867	ALPSMN263313035	2011-01-03	ALAV2A263313030	2011-01-03	0.0213759	0	5670	5565	5629.16	5631	Kuri	28.1703	24.7905	27.7123	216.828
alos10868	ALPSMN263313030	2011-01-03	ALAV2A263313030	2011-01-03	8.71365	0.523361	6647	5332	5919.6	5909	Kuri	22.0907	26.473	17.5994	12.4398
alos10869	ALPSMN263313035	2011-01-03	ALAV2A263313030	2011-01-03	0.0517419	0	5914	5656	5808.09	5821	Kuri	35.2318	29.6944	39.593	359.322
alos10870	ALPSMN263313035	2011-01-03	ALAV2A102273040	2007-12-26	0.0991706	0	5521	5380	5464.22	5470	Chamkhar	27.1257	20.7203	31.8952	45.4819
alos10871	ALPSMN263313035	2011-01-03	ALAV2A102273040	2007-12-26	2.88492	0	5744	5060	5481.97	5508	Kuri	16.73	16.639	17.0413	44.8083
alos10872	ALPSMN263313035	2011-01-03	ALAV2A263313030	2011-01-03	0.130398	0	5825	5493	5638.63	5636	Kuri	26.0905	25.7051	27.8126	45.9306
alos10873	ALPSMN263313035	2011-01-03	ALAV2A263313030	2011-01-03	0.555714	0	5833	5456	5653.33	5655	Kuri	21.0313	24.373	16.9923	80.2636
alos10874	ALPSMN263313035	2011-01-03	ALAV2A263313030	2011-01-03	0.585262	0.134965	5854	5298	5558.27	5560	Kuri	22.6905	20.3553	23.9495	3.11867
alos10875	ALPSMN263313035	2011-01-03	ALAV2A263313030	2011-01-03	0.30123	0	6261	5443	5751.6	5640	Kuri	27.5727	31.2847	23.7197	164.689
alos10876	ALPSMN263313030	2011-01-03	ALAV2A263313030	2011-01-03	0.321826	0	5944	5544	5762.59	5763	Langkamu	29.275	30.8275	27.5677	331.183
alos10877	ALPSMN263313040	2011-01-03	ALAV2A102273040	2007-12-26	0.39696	0	5272	5113	5190.32	5187	Chamkhar	19.6282	19.3715	19.2538	354.074
alos10878	ALPSMN263313035	2011-01-03	ALAV2A102273040	2007-12-26	0.203692	0	5680	5376	5509.26	5502	Chamkhar	30.7516	35.2327	26.2426	163.349
alos10879	ALPSMN263313030	2011-01-03	ALAV2A263313030	2011-01-03	0.0864884	0	5949	5580	5794.9	5791	Langkamu	37.1315	38.154	35.4883	342.689
alos10880	ALPSMN263313030	2011-01-03	ALAV2A263313030	2011-01-03	0.0228814	0	6152	6028	6098.36	6092	Langkamu	38.1831	29.0362	45.29	215.496
alos10881	ALPSMN263313035	2011-01-03	ALAV2A102273040	2007-12-26	0.236538	0	5738	5290	5489.84	5481	Chamkhar	20.9788	23.8845	18.2655	175.755
alos10882	ALPSMN263313035	2011-01-03	ALAV2A102273040	2007-12-26	0.190039	0	5553	5306	5458.95	5461	Chamkhar	28.8605	23.1906	33.3709	282.443
alos10883	ALPSMN263313035	2011-01-03	ALAV2A263313030	2011-01-03	0.320061	0	5697	5329	5522.58	5509	Kuri	20.006	18.7843	20.1749	166.15
alos10884	ALPSMN263313035	2011-01-03	ALAV2A263313030	2011-01-03	0.843581	0	6064	5256	5687.95	5681	Kuri	24.2094	25.9988	22.1326	122.919
alos10885	ALPSMN263313030	2011-01-03	ALAV2A263313030	2011-01-03	0.251346	0	6276	5793	6089.72	6095	Langkamu	38.8276	35.5343	42.8385	317.43
alos10886	ALPSMN263313030	2011-01-03	ALAV2A263313030	2011-01-03	1.97159	1.00767	6167	5410	5729.85	5715	Kuri	22.6534	26.0367	18.4732	223.36
alos10887	ALPSMN263313030	2011-01-03	ALAV2A263313030	2011-01-03	0.0159166	0	6175	6068	6136.67	6155	Langkamu	26.774	16.0081	37.5773	175.986
alos10888	ALPSMN263313035	2011-01-03	ALAV2A102273040	2007-12-26	0.47775	0	5526	5201	5381.77	5388	Kuri	18.37	16.8251	18.5381	1.44271
alos10889	ALPSMN263313030	2011-01-03	ALAV2A263313030	2011-01-03	1.05467	0	6425	5505	6026.91	6064	Langkamu	32.6425	34.099	30.8546	272.92
alos10890	ALPSMN263313035	2011-01-03	ALAV2A263313030	2011-01-03	4.17301	0.289798	6267	5078	5542.26	5509	Kuri	24.1849	27.5289	20.7803	32.7661
alos10891	ALPSMN263313030	2011-01-03	ALAV2A263313030	2011-01-03	1.96565	0.0666645	6239	5346	5786.04	5769	Langkamu	29.0369	34.6116	23.8146	334.158
alos10892	ALPSMN263313030	2011-01-03	ALAV2A263313030	2011-01-03	0.0820528	0	6420	6131	6279.54	6269	Kuri	34.8271	37.1053	33.0758	183.914
alos10893	ALPSMN263313030	2011-01-03	ALAV2A263313030	2011-01-03	0.365392	0.274332	5823	5482	5601.7	5576	Kuri	28.3753	39.2047	16.635	232.109
alos10894	ALPSMN263313030	2011-01-03	ALAV2A263313030	2011-01-03	0.275207	0	6418	5814	6173.7	6207	Kuri	34.7074	29.4317	40.641	297.122
alos10895	ALPSMN263313030	2011-01-03	ALAV2A263313030	2011-01-03	0.174101	0	6407	5831	6150.12	6120	Kuri	26.5886	28.9737	25.6709	174.112
alos10896	ALPSMN263313035	2011-01-03	ALAV2A102273040	2007-12-26	0.494579	0	5563	5180	5354.21	5349	Kuri	23.2579	23.2815	22.3145	346.933
alos10897	ALPSMN263313035	2011-01-03	ALAV2A102273040	2007-12-26	0.194347	0	5458	5207	5329.34	5332	Chamkhar	24.3245	23.2397	24.6936	320.421
alos10898	ALPSMN263313035	2011-01-03	ALAV2A102273040	2007-12-26	4.079	0	5763	5150	5395.05	5357	Chamkhar	14.9223	17.8605	12.0882	111.524
alos10899	ALPSMN263313030	2011-01-03	ALAV2A263313030	2011-01-03	0.871307	0.034687	6663	5836	6261.08	6279	Kuri	30.1499	35.0514	24.999	293.72
alos10900	ALPSMN263313030	2011-01-03	ALAV2A263313030	2011-01-03	0.251463	0	6431	5863	6154.52	6142	Kuri	35.6294	37.8532	32.3965	145.697
alos10901	ALPSMN263313035	2011-01-03	ALAV2A102273040	2007-12-26	0.161765	0	5504	5276	5381.22	5379	Chamkhar	27.558	26.4675	28.4481	266.443
alos10902	ALPSMN263313030	2011-01-03	ALAV2A263313030	2011-01-03	2.06168	0	6430	5362	5980.5	5957	Langkamu	27.0206	28.1273	25.4814	16.7375
alos10903	ALPSMN263313035	2011-01-03	ALAV2A102273040	2007-12-26	0.46447	0	5568	5273	5415.47	5427	Chamkhar	19.9229	17.2765	22.6747	281.88
alos10904	ALPSMN263313035	2011-01-03	ALAV2A102273040	2007-12-26	0.225495	0	5499	5236	5334.55	5315	Chamkhar	25.161	32.8926	17.3862	325.723
alos10905	ALPSMN263313030	2011-01-03	ALAV2A263313030	2011-01-03	0.0537456	0	5946	5777	5858.08	5851	Kuri	31.0394	30.6264	29.6532	11.3087
alos10906	ALPSMN263313035	2011-01-03	ALAV2A102273040	2007-12-26	0.338587	0	5629	5306	5453.88	5437	Chamkhar	23.2784	25.5558	21.1408	87.9939
alos10907	ALPSMN263313030	2011-01-03	ALAV2A263313030	2011-01-03	0.0122841	0	5896	5793	5857.36	5869	Langkamu	33.7092	23.3608	46.2587	341.009
alos10908	ALPSMN263313035	2011-01-03	ALAV2A102273040	2007-12-26	0.139084	0	5504	5292	5394.98	5387	Chamkhar	23.1959	27.9147	17.3388	52.7809
alos10909	ALPSMN263313035	2011-01-03	ALAV2A102273040	2007-12-26	0.0488988	0	5360	5266	5321.85	5329	Chamkhar	24.0307	18.0174	30.0351	45.6036
alos10910	ALPSMN263313035	2011-01-03	ALAV2A102273040	2007-12-26	0.475731	0	5485	5249	5371.88	5375	Chamkhar	17.0074	17.6176	16.9114	193.994
alos10911	ALPSMN263313035	2011-01-03	ALAV2A263313030	2011-01-03	0.140699	0	5639	5369	5508.5	5514	Kuri	26.5319	28.3973	26.0612	28.0619
alos10912	ALPSMN263313035	2011-01-03	ALAV2A102273040	2007-12-26	0.0926879	0	5357	5246	5300.77	5302	Chamkhar	17.4899	19.1881	15.6368	24.38
alos10913	ALPSMN263313035	2011-01-03	ALAV2A102273040	2007-12-26	0.311783	0	5546	5140	5366.76	5357	Chamkhar	22.7484	25.0007	20.6205	55.1803
alos10914	ALPSMN263313030	2011-01-03	ALAV2A263313030	2011-01-03	0.0355763	0	5998	5794	5911.55	5920	Langkamu	31.4262	21.8404	39.7466	81.31
alos10915	ALPSMN263313035	2011-01-03	ALAV2A102273040	2007-12-26	0.505519	0.0209276	5570	5276	5429.63	5441	Chamkhar	17.5267	16.1439	17.7915	216.791
alos10916	ALPSMN263313030	2011-01-03	ALAV2A263313030	2011-01-03	0.290987	0.0509793	6054	5758	5859.79	5851	Kuri	20.6217	22.7631	17.0411	328.309
alos10917	ALPSMN263313035	2011-01-03	ALAV2A102273040	2007-12-26	0.126227	0	5406	5185	5304.15	5305	Chamkhar	22.6494	20.5734	23.032	36.3652
alos10918	ALPSMN263313035	2011-01-03	ALAV2A102273040	2007-12-26	0.0708131	0	5407	5232	5307.41	5296	Chamkhar	20.1847	23.8496	15.758	339.967
alos10919	ALPSMN263313035	2011-01-03	ALAV2A102273040	2007-12-26	0.0924316	0	5500	5280	5375.95	5359	Chamkhar	24.4107	28.3892	19.1557	137.17
alos10920	ALPSMN263313035	2011-01-03	ALAV2A102273040	2007-12-26	0.0874381	0	5559	5352	5451.02	5445	Chamkhar	24.9365	28.8798	20.5528	251.978
alos10921	ALPSMN263313030	2011-01-03	ALAV2A263313030	2011-01-03	9.60365	3.10013	7435	5369	6013.28	5962	Kuri	19.0598	24.9785	13.1454	322.085
alos10922	ALPSMN263313030	2011-01-03	ALAV2A263313030	2011-01-03	3.22134	2.34344	5990	5066	5356.14	5294	Kuri	16.6792	22.1819	10.6696	160.624
alos10923	ALPSMN263313035	2011-01-03	ALAV2A102273040	2007-12-26	0.0544514	0	5315	5168	5258.89	5269	Chamkhar	27.7202	23.6672	31.1076	27.4999
alos10924	ALPSMN263313030	2011-01-03	ALAV2A263313030	2011-01-03	0.652905	0.0985646	6370	5682	5907.82	5843	Kuri	24.4143	32.4977	16.6783	326.674
alos10925	ALPSMN263313035	2011-01-03	ALAV2A102273040	2007-12-26	0.152534	0	5420	5273	5340.75	5342	Chamkhar	19.3186	22.1943	17.5044	55.5801
alos10926	ALPSMN263313035	2011-01-03	ALAV2A102273040	2007-12-26	0.298228	0	5445	5069	5241.24	5241	Chamkhar	24.608	26.8604	21.1088	44.4612
alos10927	ALPSMN263313035	2011-01-03	ALAV2A263313030	2011-01-03	0.061867	0	5474	5354	5399.22	5393	Kuri	24.7376	31.7148	16.3767	341.077
alos10928	ALPSMN263313030	2011-01-03	ALAV2A263313030	2011-01-03	0.374545	0	6170	5668	5847.23	5819	Kuri	27.4421	34.0823	20.2423	355.431
alos10929	ALPSMN263313035	2011-01-03	ALAV2A263313030	2011-01-03	1.62087	0	5585	5039	5356.88	5378	Kuri	17.2173	16.1658	17.8942	304.501
alos10930	ALPSMN263313035	2011-01-03	ALAV2A102273040	2007-12-26	0.0855446	0	5448	5140	5277.36	5261	Chamkhar	28.6884	31.4955	27.08	23.0095
alos10931	ALPSMN263313035	2011-01-03	ALAV2A102273040	2007-12-26	0.184092	0	5372	5258	5316.19	5320	Chamkhar	19.7973	19.9681	17.8147	328.27
alos10932	ALPSMN263313030	2011-01-03	ALAV2A263313030	2011-01-03	1.52895	1.23804	5690	5163	5350.32	5311	Kuri	15.5634	20.7084	10.4943	134.146
alos10933	ALPSMN263313035	2011-01-03	ALAV2A102273040	2007-12-26	0.223313	0	5373	5225	5298.56	5296	Chamkhar	20.0452	20.3187	19.605	54.4091
alos10934	ALPSMN263313030	2011-01-03	ALAV2A263313030	2011-01-03	1.4678	0.181408	6374	5508	5897.56	5854	Kuri	24.5649	28.154	21.4143	354.794
alos10935	N/A	N/A	ALAV2A263313030	2011-01-03	0.0722904	0	5758	5520	5626.67	5612	Langkamu	27.1246	29.2291	24.0946	12.8533
alos10936	ALPSMN263313035	2011-01-03	ALAV2A263313030	2011-01-03	0.17084	0	5530	5161	5303.32	5301	Chamkhar	25.5184	26.4603	23.671	100.882
alos10937	ALPSMN263313030	2011-01-03	ALAV2A263313030	2011-01-03	0.0559826	0	5651	5450	5531.41	5518	Kuri	27.7419	34.5031	19.8651	6.0262
alos10938	ALPSMN263313035	2011-01-03	ALAV2A263313030	2011-01-03	1.13588	0	5499	5114	5311.16	5304	Kuri	20.9845	24.0192	17.7664	352.598
alos10939	ALPSMN263313035	2011-01-03	ALAV2A263313030	2011-01-03	0.0154924	0	5320	5197	5258.33	5257	Chamkhar	36.5042	36.7513	40.1273	73.7131
alos10940	ALPSMN263313030	2011-01-03	ALAV2A263313030	2011-01-03	0.405028	0.0334938	6078	5548	5749.65	5710	Kuri	24.7789	29.1324	20.5166	9.91177
alos10941	ALPSMN263313030	2011-01-03	ALAV2A263313030	2011-01-03	1.48386	1.02472	5777	5069	5216.96	5151	Kuri	18.0348	26.6405	9.21846	130.848
alos10942	ALPSMN263313035	2011-01-03	ALAV2A263313030	2011-01-03	0.0343603	0	5723	5583	5660.3	5664	Kuri	32.575	31.2176	35.0633	15.1456
alos10943	ALPSMN263313030	2011-01-03	ALAV2A263313030	2011-01-03	0.540453	0	6051	5496	5790.38	5819	Kuri	20.8131	15.5102	26.6757	345.43
alos10944	ALPSMN263313030	2011-01-03	ALAV2A263313030	2011-01-03	0.527849	0	5978	5563	5788.12	5800	Langkamu	25.9536	25.8623	26.4065	274.954
alos10945	ALPSMN263313035	2011-01-03	ALAV2A263313030	2011-01-03	0.950216	0	5671	5067	5373.02	5357	Kuri	22.2191	21.4763	22.281	332.083
alos10946	ALPSMN263313030	2011-01-03	ALAV2A263313030	2011-01-03	0.0919885	0	5866	5599	5736.48	5718	Kuri	26.9756	30.8109	23.6947	340.937
alos10947	ALPSMN263313035	2011-01-03	ALAV2A263313030	2011-01-03	0.0736319	0	5560	5357	5479.25	5496	Kuri	34.8541	37.1784	32.4581	238.692
alos10948	ALPSMN263313035	2011-01-03	ALAV2A263313030	2011-01-03	0.129986	0	5626	5304	5459.29	5462	Kuri	36.5405	31.1987	42.027	19.4055
alos10949	ALPSMN263313030	2011-01-03	ALAV2A263313030	2011-01-03	0.644125	0	5952	5463	5746.22	5759	Langkamu	27.9587	28.3786	26.8553	305.286
alos10950	ALPSMN263313030	2011-01-03	ALAV2A263313030	2011-01-03	0.20871	0	5697	5533	5616.88	5629	Langkamu	16.3101	15.7898	16.585	302.987
alos10951	ALPSMN263313035	2011-01-03	ALAV2A102273040	2007-12-26	0.0928238	0	5529	5271	5417.55	5416	Chamkhar	26.8294	26.0122	31.2735	194.566
alos10952	ALPSMN263313035	2011-01-03	ALAV2A263313030	2011-01-03	0.286657	0	5587	5117	5421.61	5454	Kuri	22.6967	18.4787	27.3464	321.842
alos10953	ALPSMN263313030	2011-01-03	ALAV2A263313030	2011-01-03	0.0609865	0	5774	5547	5683.62	5689	Kuri	33.033	29.5353	36.3159	3.85789
alos10954	ALPSMN263313030	2011-01-03	ALAV2A263313030	2011-01-03	0.658205	0	5833	5426	5647.36	5649	Langkamu	23.3558	21.7584	24.4222	344.288
alos10955	ALPSMN263313035	2011-01-03	ALAV2A263313030	2011-01-03	0.145463	0	5811	5521	5688.24	5693	Kuri	29.6172	28.1972	30.3178	98.9379
alos10956	ALPSMN263313035	2011-01-03	ALAV2A102273040	2007-12-26	0.0864746	0	5457	5368	5414.65	5415	Chamkhar	14.6998	12.6113	15.8645	180.781
alos10957	ALPSMN263313035	2011-01-03	ALAV2A263313030	2011-01-03	0.275009	0	5673	5357	5535.66	5532	Kuri	22.4785	20.7881	23.391	70.2307
alos10958	ALPSMN263313030	2011-01-03	ALAV2A263313030	2011-01-03	9.32672	1.41903	6591	4714	5618.18	5578	Kuri	19.28	19.6882	18.4833	12.9549
alos10959	ALPSMN263313035	2011-01-03	ALAV2A263313030	2011-01-03	0.354177	0	5590	5397	5506.65	5514	Kuri	19.0918	17.6737	20.9438	81.8117
alos10960	ALPSMN263313035	2011-01-03	ALAV2A263313030	2011-01-03	1.43319	0.161037	6029	5127	5384.59	5364	Kuri	17.7991	20.9221	14.3482	304.942
alos10961	ALPSMN263313030	2011-01-03	ALAV2A263313030	2011-01-03	12.6808	7.46492	6009	4577	5137.01	4952	Kuri	16.3973	22.2839	10.3545	125.979
alos10962	ALPSMN263313035	2011-01-03	ALAV2A102273040	2007-12-26	0.0858578	0	5378	5275	5325.22	5323	Chamkhar	17.6912	16.1325	19.8728	126.101
alos10963	ALPSMN263313035	2011-01-03	ALAV2A263313030	2011-01-03	0.230014	0	5563	5294	5425.14	5423	Kuri	24.9805	30.732	18.4143	5.64701
alos10964	ALPSMN263313030	2011-01-03	ALAV2A263313030	2011-01-03	6.3712	1.50903	5881	4698	5319.8	5380	Kuri	19.0583	20.3645	17.7269	126.894
alos10965	ALPSMN263313035	2011-01-03	ALAV2A263313030	2011-01-03	0.468301	0	5588	5192	5408.16	5424	Kuri	23.2986	20.6725	24.9825	11.3469
alos10966	ALPSMN263313035	2011-01-03	ALAV2A102273040	2007-12-26	7.27916	0.926682	6027	4906	5442.22	5473	Chamkhar	18.3169	18.7229	17.4968	173.486
alos10967	ALPSMN263313035	2011-01-03	ALAV2A263313030	2011-01-03	0.323973	0	5503	5187	5359.05	5375	Kuri	26.6027	23.6625	30.1302	357.399
alos10968	ALPSMN263313030	2011-01-03	ALAV2A263313030	2011-01-03	1.29694	0	5617	4952	5240.23	5221	Kuri	23.5232	24.1808	22.6217	105.977
alos10969	ALPSMN263313030	2011-01-03	ALAV2A263313030	2011-01-03	0.638353	0	5751	5361	5566.26	5555	Kuri	19.0241	22.7026	15.7112	289.917
alos10970	N/A	N/A	ALAV2A263313030	2011-01-03	0.0431899	0	5837	5512	5655.96	5656	Langkamu	36.187	41.0985	30.7376	4.05389
alos10971	ALPSMN263313035	2011-01-03	ALAV2A263313030	2011-01-03	0.141062	0	5537	5266	5383.6	5388	Kuri	30.3742	34.3128	25.9593	323.789
alos10972	ALPSMN263313035	2011-01-03	ALAV2A102273040	2007-12-26	0.141443	0	5383	5199	5326.72	5340	Chamkhar	18.5741	14.9444	21.7806	60.2875
alos10973	ALPSMN263313030	2011-01-03	ALAV2A263313030	2011-01-03	0.156161	0	5986	5401	5673.79	5683	Kuri	37.6398	36.3798	36.1293	321.462
alos10974	ALPSMN263313030	2011-01-03	ALAV2A263313030	2011-01-03	0.163708	0	6186	5474	5808.6	5804	Kuri	38.4671	37.7257	39.8248	332.409
alos10975	ALPSMN263313035	2011-01-03	ALAV2A102273040	2007-12-26	0.169716	0	5574	5383	5468.04	5467	Chamkhar	26.8796	25.9606	27.6573	95.9693
alos10976	ALPSMN263313035	2011-01-03	ALAV2A102273040	2007-12-26	0.240735	0	5552	5326	5458	5470	Chamkhar	23.0298	18.7042	25.5467	110.31
alos10977	ALPSMN263313030	2011-01-03	ALAV2A263313030	2011-01-03	0.784357	0	6345	5354	5790.86	5735	Kuri	34.4187	39.4308	29.819	336.56
alos10978	ALPSMN263313035	2011-01-03	ALAV2A263313030	2011-01-03	0.148066	0	5683	5409	5544.16	5549	Kuri	30.5411	32.7654	28.0876	327.521
alos10979	ALPSMN263313030	2011-01-03	ALAV2A263313030	2011-01-03	3.34847	0	5779	4947	5322.38	5306	Kuri	27.8505	28.0698	27.4742	152.604
alos10980	ALPSMN263313030	2011-01-03	ALAV2A263313030	2011-01-03	0.0576861	0	5509	5330	5413.18	5409	Kuri	29.7412	35.7275	24.2755	9.53278
alos10981	ALPSMN263313035	2011-01-03	ALAV2A263313030	2011-01-03	4.69947	0.313935	6033	5014	5516.19	5528	Kuri	16.7586	18.8442	14.6728	70.8964
alos10982	ALPSMN263313035	2011-01-03	ALAV2A102273040	2007-12-26	3.16682	0.754674	6016	5047	5390.63	5357	Chamkhar	18.7037	20.3609	16.6376	213.065
alos10983	ALPSMN263313030	2011-01-03	ALAV2A263313030	2011-01-03	0.142518	0	5639	5284	5482.24	5495	Kuri	33.0908	31.6237	34.2336	354.802
alos10984	ALPSMN263313035	2011-01-03	ALAV2A263313030	2011-01-03	0.340814	0	5689	5330	5540.56	5561	Kuri	18.3428	15.8736	20.4731	5.18062
alos10985	ALPSMN263313035	2011-01-03	ALAV2A263313030	2011-01-03	0.216813	0	5678	5377	5548.29	5555	Kuri	23.3787	20.5117	25.9788	14.685
alos10986	ALPSMN263313030	2011-01-03	ALAV2A263313030	2011-01-03	0.0418302	0	5258	5204	5230.11	5230	Kuri	15.6417	18.8789	14.5093	18.6691
alos10987	ALPSMN263313035	2011-01-03	ALAV2A263313030	2011-01-03	0.0394128	0	5717	5545	5639.11	5649	Langkamu	25.9603	20.5841	30.401	327.146
alos10988	ALPSMN263313035	2011-01-03	ALAV2A102273040	2007-12-26	0.0919794	0	5549	5210	5367.85	5375	Chamkhar	33.3439	31.961	35.5884	292.454
alos10989	ALPSMN263313035	2011-01-03	ALAV2A263313030	2011-01-03	0.369052	0	5685	5382	5553.55	5561	Kuri	20.5983	16.6134	22.9696	67.5661
alos10990	ALPSMN263313035	2011-01-03	ALAV2A102273040	2007-12-26	0.0751844	0	5494	5236	5389.8	5410	Chamkhar	34.0666	30.1029	37.2664	287.55
alos10991	ALPSMN263313030	2011-01-03	ALAV2A263313030	2011-01-03	0.8046	0	6016	5145	5414.28	5375	Kuri	27.3729	34.0308	20.0886	39.3897
alos10992	ALPSMN263313030	2011-01-03	ALAV2A263313030	2011-01-03	1.46389	0	5814	4983	5453.02	5470	Kuri	29.2743	27.2881	30.9769	112.106
alos10993	ALPSMN263313035	2011-01-03	ALAV2A263313030	2011-01-03	0.17333	0	5734	5478	5637.82	5642	Langkamu	28.472	23.423	32.2634	339.131
alos10994	ALPSMN263313035	2011-01-03	ALAV2A102273040	2007-12-26	0.362498	0	5432	5193	5301.95	5306	Chamkhar	22.8919	22.1172	22.2046	332.119
alos10995	ALPSMN263313035	2011-01-03	ALAV2A263313030	2011-01-03	0.340502	0	5754	5234	5552.28	5561	Chamkhar	25.6784	23.4444	26.9103	226.026
alos10996	ALPSMN263313035	2011-01-03	ALAV2A102273040	2007-12-26	0.0850639	0	5382	5168	5281.09	5286	Chamkhar	28.4074	28.2832	28.5789	346.687
alos10997	ALPSMN263313035	2011-01-03	ALAV2A263313030	2011-01-03	0.0792691	0	5694	5327	5538.98	5554	Chamkhar	35.525	35.7031	36.9262	257.31
alos10998	ALPSMN263313035	2011-01-03	ALAV2A102273040	2007-12-26	0.038673	0	5337	5216	5280.07	5283	Chamkhar	30.5429	27.3187	33.7389	345.862
alos10999	ALPSMN213863040	2010-01-29	ALAV2A102273040	2007-12-26	0.259355	0	5369	5184	5289.56	5292	Chamkhar	19.994	19.2537	21.3986	327.51
alos11000	ALPSMN213863040	2010-01-29	ALAV2A102273040	2007-12-26	0.0877641	0	5352	5245	5284.4	5283	Chamkhar	18.959	22.375	17.2774	205.283
alos11001	ALPSMN263313035	2011-01-03	ALAV2A263313030	2011-01-03	3.28383	0.53765	5795	5101	5369.62	5359	Kuri	17.3437	18.5168	15.9689	355.937
alos11002	ALPSMN213863040	2010-01-29	ALAV2A102273040	2007-12-26	0.27275	0	5389	5183	5305.31	5315	Chamkhar	20.8089	16.3455	26.7454	24.3311
alos11003	ALPSMN263313035	2011-01-03	ALAV2A102273040	2007-12-26	0.0745337	0	5338	5176	5261.38	5269	Chamkhar	23.7098	20.7774	25.6955	319.946
alos11004	ALPSMN263313035	2011-01-03	ALAV2A102273040	2007-12-26	0.0697488	0	5507	5319	5430.87	5443	Chamkhar	29.0198	17.3131	40.8785	248.666
alos11005	ALPSMN263313035	2011-01-03	ALAV2A263313030	2011-01-03	8.4583	0.743106	6194	4909	5506.83	5569	Chamkhar	15.8576	17.516	13.9083	235.609
alos11006	ALPSMN213863040	2010-01-29	ALAV2A102273040	2007-12-26	0.15146	0	5307	5086	5193.16	5196	Chamkhar	28.4442	27.4867	28.8542	331.066
alos11007	ALPSMN263313035	2011-01-03	ALAV2A102273040	2007-12-26	0.305459	0	5490	5165	5361.47	5390	Chamkhar	22.2453	19.3913	25.621	150.567
alos11008	ALPSMN263313035	2011-01-03	ALAV2A263313030	2011-01-03	0.448893	0.272157	5776	5319	5547.19	5541	Kuri	16.5838	19.7795	14.0682	306.525
alos11009	ALPSMN263313035	2011-01-03	ALAV2A263313030	2011-01-03	0.28625	0	5901	5535	5728.38	5739	Kuri	25.3453	24.4571	25.1754	36.1397
alos11010	ALPSMN213863040	2010-01-29	ALAV2A102273040	2007-12-26	0.972718	0	5460	5129	5282.63	5289	Chamkhar	15.4882	15.3842	15.2697	293.046
alos11011	ALPSMN213863040	2010-01-29	ALAV2A102273040	2007-12-26	0.0987691	0	5362	5173	5275.3	5276	Chamkhar	17.4966	14.0048	21.5622	222.485
alos11012	ALPSMN213863040	2010-01-29	ALAV2A102273040	2007-12-26	0.0907349	0	5439	5241	5349.25	5349	Chamkhar	20.906	22.9034	19.1121	298.662
alos11013	ALPSMN263313030	2011-01-03	ALAV2A263313030	2011-01-03	0.0421852	0	5584	5456	5532.06	5540	Kuri	24.1213	22.431	22.7031	185.82
alos11014	ALPSMN213863040	2010-01-29	ALAV2A102273040	2007-12-26	0.349812	0	5437	5201	5353.09	5369	Chamkhar	16.4439	11.3136	21.2353	276.435
alos11015	ALPSMN213863040	2010-01-29	ALAV2A102273040	2007-12-26	0.13288	0	5477	5205	5321.22	5313	Chamkhar	18.035	18.0695	18.1294	234.239
alos11016	ALPSMN263313035	2011-01-03	ALAV2A102273040	2007-12-26	0.137994	0	5521	5363	5437.21	5433	Chamkhar	29.1952	27.6962	28.0303	122.72
alos11017	ALPSMN263313030	2011-01-03	ALAV2A263313030	2011-01-03	0.0123524	0	5445	5420	5435.46	5438	Kuri	13.3861	8.84827	12.6747	127.775
alos11018	ALPSMN213863040	2010-01-29	ALAV2A102273040	2007-12-26	0.208346	0	5476	5089	5313.61	5349	Chamkhar	21.2715	19.1394	22.3799	209.018
alos11019	ALPSMN213863040	2010-01-29	ALAV2A102273040	2007-12-26	0.204359	0	5512	5267	5393.43	5407	Chamkhar	15.4525	13.328	17.6098	285.554
alos11020	ALPSMN263313035	2011-01-03	ALAV2A263313030	2011-01-03	0.0665209	0	5688	5484	5589.24	5584	Kuri	27.9052	30.0882	25.483	59.3355
alos11021	ALPSMN263313030	2011-01-03	ALAV2A263313030	2011-01-03	0.152069	0	5768	5469	5638.44	5644	Kuri	26.7338	24.7126	27.488	94.4459
alos11022	ALPSMN263313035	2011-01-03	ALAV2A102273040	2007-12-26	0.420115	0	5741	5219	5450.48	5463	Chamkhar	27.4748	26.451	28.6536	148.081
alos11023	ALPSMN213863040	2010-01-29	ALAV2A102273040	2007-12-26	0.168595	0	5474	5140	5312.5	5301	Kuri	28.2329	29.2773	27.9284	97.1408
alos11024	ALPSMN263313030	2011-01-03	ALAV2A263313030	2011-01-03	0.0960167	0	5667	5470	5573.28	5571	Kuri	20.4179	22.9504	18.1676	45.3301
alos11025	ALPSMN263313030	2011-01-03	ALAV2A263313030	2011-01-03	0.0768599	0	5646	5459	5543.28	5544	Kuri	26.1983	25.5034	26.6301	78.2613
alos11026	ALPSMN213863040	2010-01-29	ALAV2A102273040	2007-12-26	0.90324	0	5511	5252	5399.67	5408	Kuri	18.927	15.9893	20.9893	119.953
alos11027	ALPSMN263313035	2011-01-03	ALAV2A263313030	2011-01-03	8.60548	1.2937	6164	5201	5588.38	5567	Kuri	19.4188	21.3829	17.5048	1.31659
alos11028	ALPSMN213863040	2010-01-29	ALAV2A102273040	2007-12-26	0.493725	0	5451	4978	5225.38	5233	Chamkhar	24.181	23.7715	24.1891	301.2
alos11029	ALPSMN263313035	2011-01-03	ALAV2A102273040	2007-12-26	0.29358	0	5622	5271	5469.09	5466	Chamkhar	26.1797	27.6948	25.7082	147.249
alos11030	ALPSMN213863040	2010-01-29	ALAV2A102273040	2007-12-26	0.17136	0	5431	5205	5327.59	5323	Chamkhar	20.082	18.6487	20.7646	8.57789
alos11031	ALPSMN213863040	2010-01-29	ALAV2A102273040	2007-12-26	0.129109	0.0145724	5409	5002	5173.22	5169	Chamkhar	27.2995	29.4654	24.5249	312.229
alos11032	ALPSMN213863040	2010-01-29	ALAV2A102273040	2007-12-26	0.0225463	0	5375	5311	5341.42	5338	Chamkhar	19.806	19.7136	18.3041	290.127
alos11033	ALPSMN213863040	2010-01-29	ALAV2A102273040	2007-12-26	0.0795649	0	5431	5288	5347.33	5342	Chamkhar	19.3028	24.5734	15.0864	319.825
alos11034	ALPSMN213863040	2010-01-29	ALAV2A102273040	2007-12-26	0.192197	0	5463	5291	5361.65	5354	Kuri	20.0713	23.0306	16.2127	105.482
alos11035	ALPSMN213863040	2010-01-29	ALAV2A102273040	2007-12-26	0.0673419	0	5333	5188	5258.26	5257	Chamkhar	22.4636	26.6666	19.2794	273.924
alos11036	ALPSMN213863040	2010-01-29	ALAV2A102273040	2007-12-26	0.0344872	0	5308	5192	5248.26	5243	Chamkhar	27.3012	29.0462	24.5182	343.422
alos11037	ALPSMN213863040	2010-01-29	ALAV2A102273040	2007-12-26	0.117311	0	5397	5180	5312.31	5321	Chamkhar	31.3127	27.9046	34.5953	161.214
alos11038	ALPSMN213863040	2010-01-29	ALAV2A102273040	2007-12-26	0.0875163	0	5405	5248	5353.75	5367	Kuri	21.3235	16.1844	26.0958	82.3299
alos11039	ALPSMN213863040	2010-01-29	ALAV2A102273040	2007-12-26	0.115359	0.0133317	5347	5179	5249.13	5244	Chamkhar	23.1915	27.4774	16.4454	324.204
alos11040	ALPSMN213863040	2010-01-29	ALAV2A102273040	2007-12-26	0.345405	0	5382	5067	5264.43	5283	Kuri	21.6748	22.0686	20.3182	42.8354
alos11041	ALPSMN263313035	2011-01-03	ALAV2A102273040	2007-12-26	5.70461	2.03265	5641	4848	5212.36	5283	Chamkhar	17.107	16.7076	17.766	219.04
alos11042	ALPSMN213863040	2010-01-29	ALAV2A102273040	2007-12-26	0.149496	0	5371	5139	5228.22	5209	Kuri	29.1651	39.4754	17.7615	350.991
alos11043	ALPSMN213863040	2010-01-29	ALAV2A102273040	2007-12-26	2.94885	0	5438	4834	5237.14	5238	Chamkhar	16.1471	17.1977	14.9968	103.354
alos11044	ALPSMN213863040	2010-01-29	ALAV2A102273040	2007-12-26	0.0327156	0	5418	5345	5379.03	5380	Kuri	22.5266	20.7121	23.6798	134.887
alos11045	ALPSMN213863040	2010-01-29	ALAV2A102273040	2007-12-26	0.0100375	0	5460	5405	5443.18	5450	Chamkhar	19.3902	14.0212	20.9458	186.45
alos11046	ALPSMN213863040	2010-01-29	ALAV2A102273040	2007-12-26	0.0205984	0	5341	5249	5281.04	5276	Chamkhar	22.3531	28.4055	21.4502	42.9281
alos11047	ALPSMN213863040	2010-01-29	ALAV2A102273040	2007-12-26	0.136201	0	5397	5174	5276.32	5286	Chamkhar	25.0863	23.2534	26.6396	72.2342
alos11048	ALPSMN213863040	2010-01-29	ALAV2A102273040	2007-12-26	0.0971475	0	5359	5092	5254.25	5260	Chamkhar	31.1166	29.0634	33.1501	84.9732
alos11049	ALPSMN213863040	2010-01-29	ALAV2A102273040	2007-12-26	0.063325	0	5345	5265	5305.9	5305	Kuri	17.554	16.6086	17.5907	142.35
alos11050	ALPSMN213863040	2010-01-29	ALAV2A102273040	2007-12-26	0.439026	0	5300	5028	5154.81	5156	Chamkhar	21.8385	22.2064	22.703	42.1423
alos11051	ALPSMN263313035	2011-01-03	ALAV2A263313030	2011-01-03	0.0760675	0	5964	5714	5827.55	5822	Kuri	28.7859	32.071	26.7102	350.927
alos11052	ALPSMN263313035	2011-01-03	ALAV2A102273040	2007-12-26	0.0190102	0	5403	5288	5359.16	5382	Chamkhar	30.8001	19.6704	38.5754	275.858
alos11053	ALPSMN263313035	2011-01-03	ALAV2A102273040	2007-12-26	0.0180239	0	5391	5343	5365.56	5368	Chamkhar	22.2844	20.7511	29.028	278.907
alos11054	ALPSMN263313035	2011-01-03	ALAV2A102273040	2007-12-26	0.06931	0	5391	5187	5296.99	5307	Chamkhar	30.5222	28.7664	30.3771	317.38
alos11055	ALPSMN263313035	2011-01-03	ALAV2A102273040	2007-12-26	0.0226244	0	5445	5345	5415.19	5426	Chamkhar	20.4605	11.4996	32.4307	237.599
alos11056	ALPSMN263313035	2011-01-03	ALAV2A102273040	2007-12-26	0.118541	0	5369	5108	5271.67	5292	Chamkhar	25.6444	19.092	33.88	306.749
alos11057	ALPSMN263313035	2011-01-03	ALAV2A102273040	2007-12-26	0.20622	0	5407	5247	5327.79	5326	Chamkhar	20.6657	18.4297	25.0718	252.357
alos11058	ALPSMN263313035	2011-01-03	ALAV2A263313030	2011-01-03	2.11609	1.21097	6022	5218	5529.39	5561	Kuri	18.8916	20.9434	15.1163	345.687
alos11059	ALPSMN263313035	2011-01-03	ALAV2A102273040	2007-12-26	0.519811	0	5401	5097	5247.71	5250	Kuri	17.0272	16.4869	17.7692	119.225
alos11060	ALPSMN213863035	2010-01-29	ALAV2A102273040	2007-12-26	5.36818	0.979325	6024	4746	5297.64	5329	Kuri	17.2141	18.562	16.0021	129.52
alos11061	ALPSMN263313030	2011-01-03	ALAV2A263313030	2011-01-03	0.0635902	0	5617	5353	5491.78	5501	Kuri	39.1702	41.8735	38.3824	15.286
alos11062	ALPSMN263313030	2011-01-03	ALAV2A263313030	2011-01-03	0.187039	0	5795	5471	5624.06	5606	Kuri	26.9637	26.55	28.7016	150.029
alos11063	ALPSMN263313035	2011-01-03	ALAV2A263313030	2011-01-03	0.671449	0	5837	5447	5644.83	5658	Kuri	16.5601	17.2947	16.2844	354.53
alos11064	ALPSMN263313030	2011-01-03	ALAV2A263313030	2011-01-03	0.0977066	0	5491	5022	5246	5247	Kuri	36.3796	36.3986	35.493	359.266
alos11065	ALPSMN263313030	2011-01-03	ALAV2A263313030	2011-01-03	0.0307816	0	5376	5218	5319.19	5332	Kuri	33.8405	29.0151	40.2823	349.222
alos11066	ALPSMN263313035	2011-01-03	ALAV2A263313030	2011-01-03	0.428039	0	5824	5479	5632.98	5620	Kuri	22.2837	25.7444	18.692	338.4
alos11067	ALPSMN213863035	2010-01-29	ALAV2A102273040	2007-12-26	2.08053	0	5767	5103	5350.06	5355	Kuri	17.6217	17.5608	17.5739	175.04
alos11068	ALPSMN213863035	2010-01-29	ALAV2A263313030	2011-01-03	16.0694	1.86052	6060	4584	5454.52	5577	Kuri	16.2877	16.428	15.9065	47.7244
alos11069	ALPSMN263313035	2011-01-03	ALAV2A263313030	2011-01-03	0.450338	0	5612	5285	5434.68	5442	Kuri	21.3943	23.2722	18.5878	334.181
alos11070	ALPSMN213863035	2010-01-29	ALAV2A102273040	2007-12-26	2.26976	1.03292	5463	4977	5140.48	5128	Kuri	14.5763	15.5382	13.3403	176.006
alos11071	ALPSMN213863035	2010-01-29	ALAV2A263313030	2011-01-03	0.0314734	0	5637	5521	5582.21	5584	Kuri	31.3423	33.3339	31.4206	285.29
alos11072	ALPSMN213863035	2010-01-29	ALAV2A263313030	2011-01-03	0.0514716	0	5988	5753	5863	5849	Kuri	38.7922	40.6186	39.6403	277.16
alos11073	ALPSMN213863035	2010-01-29	ALAV2A263313030	2011-01-03	0.104073	0	6041	5612	5886.66	5899	Kuri	34.5498	32.2526	37.2591	177.173
alos11074	ALPSMN213863035	2010-01-29	ALAV2A263313030	2011-01-03	0.116298	0	5704	5447	5607.73	5629	Kuri	23.7998	17.9603	30.2994	155.129
alos11075	ALPSMN213863035	2010-01-29	ALAV2A263313030	2011-01-03	0.969241	0.165666	5913	5233	5563.37	5579	Kuri	26.4449	29.8004	22.0791	324.329
alos11076	ALPSMN213863035	2010-01-29	ALAV2A102273040	2007-12-26	0.130394	0	5245	5104	5192.24	5203	Kuri	17.0994	13.6949	20.408	241.863
alos11077	ALPSMN213863035	2010-01-29	ALAV2A263313030	2011-01-03	0.366983	0	6069	5426	5696.56	5640	Kuri	27.0553	33.3263	20.6885	153.708
alos11078	ALPSMN213863035	2010-01-29	ALAV2A263313030	2011-01-03	0.0422286	0	5726	5560	5628.98	5630	Kuri	26.9685	27.4226	23.5752	108.512
alos11079	ALPSMN213863035	2010-01-29	ALAV2A263313030	2011-01-03	0.17786	0	5701	5469	5592.56	5599	Kuri	24.5695	22.2947	25.3299	90.9198
alos11080	ALPSMN213863035	2010-01-29	ALAV2A263313030	2011-01-03	0.785574	0	5879	4818	5291.27	5189	Kuri	28.1222	33.8428	22.6404	88.2283
alos11081	ALPSMN213863035	2010-01-29	ALAV2A102273040	2007-12-26	4.80301	0.432492	5893	4650	5262.54	5366	Kuri	21.0889	20.3177	21.9429	160.089
alos11082	ALPSMN213863035	2010-01-29	ALAV2A263313030	2011-01-03	0.0378807	0	5576	5310	5458.35	5455	Kuri	32.9296	27.1267	40.1821	87.6174
alos11083	ALPSMN213863035	2010-01-29	ALAV2A263313030	2011-01-03	0.406364	0	5286	4946	5117.36	5101	Kuri	19.2552	24.1936	13.8952	17.3267
alos11084	ALPSMN213863035	2010-01-29	ALAV2A263313030	2011-01-03	0.963447	0	5446	5049	5250.44	5249	Kuri	19.9646	19.6203	20.1332	6.00706
alos11085	ALPSMN213863035	2010-01-29	ALAV2A260833030	2010-12-17	0.0738584	0	5214	5075	5144.18	5147	Kuri	30.7301	31.5015	29.0922	358.831
alos11086	ALPSMN213863035	2010-01-29	ALAV2A263313030	2011-01-03	0.107262	0	5221	4975	5098.07	5110	Kuri	26.7361	27.9966	26.8464	84.7887
alos11087	ALPSMN213863035	2010-01-29	ALAV2A260833030	2010-12-17	2.25152	0.119244	5545	4781	5218.91	5260	Kuri	20.7911	22.0541	19.2875	48.3436
alos11088	ALPSMN213863035	2010-01-29	ALAV2A260833030	2010-12-17	0.0447411	0	5363	5216	5301.82	5309	Kuri	31.1687	26.2341	35.9082	352.217
alos11089	ALPSMN213863035	2010-01-29	ALAV2A260833030	2010-12-17	0.163184	0	5519	5276	5419.88	5427	Kuri	35.8813	29.922	41.6128	182.533
alos11090	ALPSMN213863035	2010-01-29	ALAV2A260833030	2010-12-17	0.0333236	0	5463	5276	5334.63	5321	Kuri	36.7593	43.6266	32.1241	205.648
alos11091	ALPSMN213863035	2010-01-29	ALAV2A260833030	2010-12-17	0.0487162	0	5420	5104	5268.18	5275	Kuri	33.312	29.4932	37.1853	51.9143
alos11092	ALPSMN213863035	2010-01-29	ALAV2A260833030	2010-12-17	0.379222	0	5488	5071	5299.26	5311	Kuri	25.6369	23.1093	27.8801	77.2771
alos11093	ALPSMN213863035	2010-01-29	ALAV2A260833030	2010-12-17	0.0732611	0	5344	5205	5264.7	5256	Kuri	22.6603	26.4651	17.8123	239.741
alos11094	ALPSMN213863035	2010-01-29	ALAV2A260833030	2010-12-17	0.240329	0	5431	5066	5242.8	5239	Kuri	27.7856	27.6769	27.3348	298.258
alos11095	ALPSMN213863035	2010-01-29	ALAV2A260833030	2010-12-17	0.047888	0	5423	5245	5343.43	5337	Kuri	22.1955	20.5131	25.7378	347.451
alos11096	ALPSMN213863035	2010-01-29	ALAV2A260833030	2010-12-17	0.0948074	0	5350	5090	5220.77	5221	Kuri	37.9752	37.0136	37.8974	103.246
alos11097	ALPSMN213863035	2010-01-29	ALAV2A260833030	2010-12-17	0.349891	0	5320	4963	5204.37	5207	Kuri	20.8728	19.0918	24.6827	295.383
alos11098	ALPSMN213863035	2010-01-29	ALAV2A260833030	2010-12-17	0.0433324	0	5246	5135	5188.11	5194	Kuri	24.8961	16.8445	31.4061	189.883
alos11099	ALPSMN213863035	2010-01-29	ALAV2A260833030	2010-12-17	0.124372	0	5277	5041	5182.61	5201	Kuri	26.2269	24.1515	30.7827	104.415
alos11100	ALPSMN213863035	2010-01-29	ALAV2A260833030	2010-12-17	0.119139	0	5266	5088	5185.53	5198	Kuri	20.1524	18.4687	25.3614	102.058
alos11101	ALPSMN213863035	2010-01-29	ALAV2A260833030	2010-12-17	0.0549478	0	5293	5180	5230.02	5227	Kuri	30.4741	32.989	26.2648	138.884
alos11102	ALPSMN213863030	2010-01-29	ALAV2A093083030	2007-10-24	0.228265	0	5647	5355	5515.72	5511	Kuri	27.2719	29.045	25.196	335.213
alos11103	ALPSMN213863030	2010-01-29	ALAV2A093083030	2007-10-24	0.109994	0	5970	5646	5848.41	5857	Kuri	35.5039	28.6439	42.7694	333.811
alos11104	ALPSMN213863030	2010-01-29	ALAV2A093083030	2007-10-24	0.0427631	0	5454	5356	5396.33	5396	Kuri	27.4212	26.8025	23.9714	317.791
alos11105	ALPSMN213863030	2010-01-29	ALAV2A093083030	2007-10-24	0.0443577	0	5845	5634	5730.75	5729	Kuri	31.425	24.2436	42.8169	324.036
alos11106	ALPSMN213863030	2010-01-29	ALAV2A093083030	2007-10-24	0.175198	0	5946	5653	5813.71	5816	Langkamu	25.6559	26.7375	22.8699	24.3771
alos11107	ALPSMN260833030	2010-12-17	ALAV2A093083030	2007-10-24	0.286073	0	5721	5245	5554.56	5571	Kuri	34.2247	27.3715	41.6662	334.019
alos11108	ALPSMN260833030	2010-12-17	ALAV2A093083030	2007-10-24	0.0425163	0	5375	5309	5344.98	5346	Kuri	20.6187	17.1389	25.8286	342.668
alos11109	ALPSMN213863030	2010-01-29	ALAV2A093083030	2007-10-24	0.295029	0	5916	5478	5668.6	5652	Langkamu	28.7761	32.4718	23.8336	349.308
alos11110	ALPSMN260833030	2010-12-17	ALAV2A093083030	2007-10-24	0.0440795	0	5333	5286	5312.08	5314	Kuri	18.7512	13.7946	25.4845	332.151
alos11111	ALPSMN260833030	2010-12-17	ALAV2A093083030	2007-10-24	0.252821	0	5850	5397	5606.17	5601	Kuri	29.0674	34.096	23.5609	204.026
alos11112	ALPSMN213863030	2010-01-29	ALAV2A093083030	2007-10-24	0.0739684	0	5978	5777	5884.63	5890	Langkamu	29.5836	27.73	32.826	72.8283
alos11113	ALPSMN213863030	2010-01-29	ALAV2A093083030	2007-10-24	0.0827349	0	5888	5577	5716.27	5714	Langkamu	37.452	36.4194	39.6605	3.71207
alos11114	ALPSMN260833030	2010-12-17	ALAV2A093083030	2007-10-24	0.252478	0	5584	5116	5315.62	5308	Kuri	31.9755	32.0064	31.2953	311.201
alos11115	ALPSMN260833030	2010-12-17	ALAV2A093083030	2007-10-24	0.738729	0	5882	5218	5572.25	5578	Kuri	31.4409	31.5329	31.6119	328.912
alos11116	ALPSMN260833030	2010-12-17	ALAV2A093083030	2007-10-24	0.180468	0	5538	5014	5242.51	5190	Kuri	36.1788	44.0175	27.0494	317.191
alos11117	ALPSMN260833030	2010-12-17	ALAV2A093083030	2007-10-24	0.462374	0	5994	5436	5615.81	5543	Kuri	24.0766	30.5065	16.696	196.11
alos11118	ALPSMN260833030	2010-12-17	ALAV2A093083030	2007-10-24	0.622643	0	5997	5304	5658.28	5649	Kuri	26.1633	28.1626	24.4266	325.555
alos11119	ALPSMN260833030	2010-12-17	ALAV2A093083030	2007-10-24	2.31491	0	6220	5021	5489.1	5490	Kuri	20.6769	24.212	17.1043	228.142
alos11120	ALPSMN260833030	2010-12-17	ALAV2A093083030	2007-10-24	0.359953	0	5265	4999	5120.92	5109	Kuri	17.8764	20.6374	15.8967	128.31
alos11121	ALPSMN260833030	2010-12-17	ALAV2A093083030	2007-10-24	0.270252	0	5476	5060	5254.66	5248	Kuri	26.0226	28.403	20.3504	113.402
alos11122	ALPSMN260833030	2010-12-17	ALAV2A093083030	2007-10-24	0.296857	0	5923	5464	5684.24	5676	Kuri	29.673	26.2061	32.4973	307.004
alos11123	ALPSMN260833030	2010-12-17	ALAV2A093083030	2007-10-24	0.609761	0	5701	4902	5293.43	5245	Kuri	23.0347	21.8815	24.5997	153.069
alos11124	ALPSMN260833030	2010-12-17	ALAV2A093083030	2007-10-24	0.447663	0	6425	5703	6000.94	5974	Kuri	33.4216	33.6615	33.2135	263.028
alos11125	ALPSMN260833030	2010-12-17	ALAV2A093083030	2007-10-24	0.0721572	0	5916	5815	5880.89	5890	Kuri	19.5723	10.9288	27.1906	179.501
alos11126	ALPSMN260833030	2010-12-17	ALAV2A093083030	2007-10-24	0.862825	0	6540	5584	6044.14	6030	Kuri	35.9394	35.3677	36.2545	307.714
alos11127	ALPSMN260833030	2010-12-17	ALAV2A093083030	2007-10-24	0.225697	0	5915	5415	5671.96	5660	Kuri	29.1972	32.1231	25.3915	355.97
alos11128	ALPSMN260833030	2010-12-17	ALAV2A093083030	2007-10-24	1.05355	0	6535	5716	6118.74	6097	Kuri	30.6294	33.0812	28.4171	214.919
alos11129	ALPSMN260833030	2010-12-17	ALAV2A093083030	2007-10-24	0.148509	0	6187	5772	5968.14	5935	Kuri	29.9127	30.8227	28.0743	245.277
alos11130	ALPSMN260833030	2010-12-17	ALAV2A093083030	2007-10-24	0.605897	0	6523	5616	5957.57	5939	Kuri	31.3969	31.9453	30.7412	338.371
alos11131	ALPSMN260833030	2010-12-17	ALAV2A093083030	2007-10-24	0.204793	0	6202	5676	5914.01	5911	Kuri	32.7323	36.4992	28.1373	260.457
alos11132	ALPSMN260833030	2010-12-17	ALAV2A093083030	2007-10-24	0.778602	0	6396	5671	5928.71	5878	Kuri	22.3421	26.5117	18.4435	347.364
alos11133	ALPSMN260833030	2010-12-17	ALAV2A093083030	2007-10-24	0.810752	0	6355	5466	5948.9	5981	Kuri	28.8784	28.3931	28.8316	239.327
alos11134	N/A	N/A	ALAV2A093083030	2007-10-24	0.146905	0	5955	5513	5761.95	5785	Langkamu	37.75	36.538	38.3061	352.329
alos11135	ALPSMN260833030	2010-12-17	ALAV2A093083030	2007-10-24	0.154099	0	6129	5663	5911.79	5919	Kuri	33.5735	26.9972	40.12	224.173
alos11136	ALPSMN260833030	2010-12-17	ALAV2A093083030	2007-10-24	0.931721	0	6548	5770	6200.34	6211	Kuri	36.2779	35.9463	36.614	234.118
alos11137	ALPSMN260833030	2010-12-17	ALAV2A093083030	2007-10-24	7.6659	0.341669	6392	4848	5641.31	5716	Kuri	19.0121	17.4569	20.3405	272.529
alos11138	ALPSMN260833030	2010-12-17	ALAV2A093083030	2007-10-24	0.158471	0	6134	5650	5932.99	5968	Kuri	28.8247	22.6692	35.4929	193.393
alos11139	ALPSMN260833030	2010-12-17	ALAV2A093083030	2007-10-24	5.62901	0	5755	4703	5307.57	5331	Kuri	19.6875	21.06	17.9936	195.765
alos11140	ALPSMN260833030	2010-12-17	ALAV2A093083030	2007-10-24	0.57255	0	5906	5675	5793.77	5796	Kuri	18.943	17.8734	19.5884	316.677
alos11141	ALPSMN260833030	2010-12-17	ALAV2A093083030	2007-10-24	0.862467	0.0885669	6082	5367	5771.2	5820	Kuri	26.8228	27.5887	26.2268	323.838
alos11142	ALPSMN260833030	2010-12-17	ALAV2A093083030	2007-10-24	0.0868545	0	5870	5697	5816.58	5826	Kuri	24.3452	18.0919	29.9596	246.455
alos11143	ALPSMN260833030	2010-12-17	ALAV2A093083030	2007-10-24	0.481042	0	6457	5796	6168.13	6197	Kuri	31.4715	26.8161	36.6569	216.981
alos11144	ALPSMN260833030	2010-12-17	ALAV2A093083030	2007-10-24	0.0189372	0	5827	5804	5819.95	5823	Kuri	13.0399	7.51564	26.1376	251.322
alos11145	ALPSMN260833030	2010-12-17	ALAV2A093083030	2007-10-24	0.124227	0	5867	5713	5802.42	5803	Kuri	19.9073	20.3524	20.7132	343.151
alos11146	ALPSMN260833030	2010-12-17	ALAV2A093083030	2007-10-24	0.330008	0	5966	5617	5792.48	5783	Kuri	26.5138	28.5143	23.9027	331.935
alos11147	ALPSMN260833030	2010-12-17	ALAV2A093083030	2007-10-24	2.38865	0.133621	6538	5077	5861.57	5911	Kuri	24.1712	23.8973	24.3548	81.5463
alos11148	ALPSMN260833030	2010-12-17	ALAV2A093083030	2007-10-24	0.0971957	0	5944	5815	5891.58	5902	Kuri	25.3148	18.9397	30.3754	119.611
alos11149	ALPSMN260833030	2010-12-17	ALAV2A093083030	2007-10-24	0.0580598	0	6253	6134	6187.92	6178	Kuri	20.3752	23.3469	18.1803	165.067
alos11150	ALPSMN260833030	2010-12-17	ALAV2A093083030	2007-10-24	0.169562	0	5969	5629	5796.99	5803	Kuri	26.4954	25.4857	27.5131	37.596
alos11151	ALPSMN260833030	2010-12-17	ALAV2A093083030	2007-10-24	1.76363	0	6324	5303	5778.51	5793	Kuri	14.8408	15.1976	14.2836	83.6487
alos11152	ALPSMN260833030	2010-12-17	ALAV2A093083030	2007-10-24	0.119123	0	6182	6022	6129.08	6142	Kuri	22.6886	16.3408	31.5082	216.099
alos11153	ALPSMN260833030	2010-12-17	ALAV2A093083030	2007-10-24	1.24149	0	6273	5210	5675.27	5692	Kuri	23.9917	20.5845	27.3461	105.971
alos11154	ALPSMN260833030	2010-12-17	ALAV2A093083030	2007-10-24	0.668207	0	5886	5523	5713.96	5720	Kuri	25.8309	25.0217	26.2011	6.93109
alos11155	ALPSMN260833030	2010-12-17	ALAV2A093083030	2007-10-24	1.33035	0	6531	5604	6070.45	6044	Kuri	26.7883	32.0374	21.5162	287.864
alos11156	ALPSMN260833030	2010-12-17	ALAV2A093083030	2007-10-24	0.292843	0	5985	5528	5764.33	5789	Kuri	24.362	26.4543	22.0636	77.4442
alos11157	ALPSMN260833030	2010-12-17	ALAV2A093083030	2007-10-24	0.230264	0	5987	5373	5675.64	5675	Kuri	26.0029	27.7286	24.9341	75.2008
alos11158	ALPSMN260833030	2010-12-17	ALAV2A093083030	2007-10-24	0.178301	0	5843	5384	5597.31	5608	Kuri	24.5651	25.4067	22.657	91.0677
alos11159	ALPSMN260833030	2010-12-17	ALAV2A093083030	2007-10-24	1.23563	0	5900	5469	5724.97	5748	Kuri	21.5038	16.4357	26.2082	32.2816
alos11160	N/A	N/A	ALAV2A093083030	2007-10-24	0.375595	0	5991	5529	5783.94	5788	Langkamu	35.7186	34.5738	36.9428	330.318
alos11161	ALPSMN260833030	2010-12-17	ALAV2A093083030	2007-10-24	2.58607	1.05441	6546	4779	5382.75	5354	Kuri	22.6491	28.1432	16.9942	54.2805
alos11162	ALPSMN260833030	2010-12-17	ALAV2A093083030	2007-10-24	0.249814	0	5791	5350	5588.75	5593	Kuri	24.6209	26.2953	21.5486	101.863
alos11163	N/A	N/A	ALAV2A093083030	2007-10-24	0.120545	0	5715	5559	5628.58	5626	Langkamu	16.5749	19.3724	12.6791	281.235
alos11164	ALPSMN260833030	2010-12-17	ALAV2A093083030	2007-10-24	1.38072	0.109687	5833	4970	5371.87	5407	Kuri	19.8498	20.1931	18.829	114.072
alos11165	ALPSMN260833030	2010-12-17	ALAV2A093083030	2007-10-24	0.371731	0	5784	5503	5690.35	5687	Kuri	19.5127	16.6577	22.0607	179.757
alos11166	ALPSMN260833030	2010-12-17	ALAV2A093083030	2007-10-24	4.21063	0	5847	4938	5322.16	5295	Kuri	22.2497	25.7752	18.9586	131.489
alos11167	N/A	N/A	ALAV2A093083030	2007-10-24	0.422796	0	5904	5505	5699.22	5701	Langkamu	22.1265	25.6049	18.877	336.859
alos11168	ALPSMN260833030	2010-12-17	ALAV2A093083030	2007-10-24	0.588985	0	5461	4743	5103.78	5115	Kuri	33.5951	35.4574	31.3417	30.4365
alos11169	ALPSMN260833030	2010-12-17	ALAV2A093083030	2007-10-24	1.03101	0	5939	5039	5370.27	5337	Kuri	23.9199	26.72	20.3257	33.5466
alos11170	N/A	N/A	ALAV2A093083030	2007-10-24	0.0323636	0	5966	5868	5931.24	5941	Langkamu	26.9978	19.5825	33.9615	302.316
alos11171	N/A	N/A	ALAV2A093083030	2007-10-24	0.783929	0	5969	5560	5776.65	5773	Langkamu	19.7082	23.6615	15.2551	270.62
alos11172	N/A	N/A	ALAV2A093083030	2007-10-24	0.0930789	0	5902	5621	5780.52	5790	Langkamu	30.0713	28.9021	31.6894	337.711
alos11173	N/A	N/A	ALAV2A093083030	2007-10-24	0.0572942	0	5754	5601	5673.11	5671	Kuri	26.3395	29.228	20.8823	16.2489
alos11174	N/A	N/A	ALAV2A093083030	2007-10-24	0.188144	0	5971	5601	5801.04	5812	Langkamu	25.5485	23.2879	27.1688	31.0855
alos11175	N/A	N/A	ALAV2A093083030	2007-10-24	0.125798	0	5875	5667	5775.87	5774	Langkamu	22.3541	21.6547	22.23	59.0685
alos11176	ALPSMN260833030	2010-12-17	ALAV2A093083030	2007-10-24	0.0607615	0	5772	5553	5667.78	5674	Kuri	30.4842	27.7267	33.5733	177.963
alos11177	N/A	N/A	ALAV2A093083030	2007-10-24	0.0622823	0	5778	5606	5697.83	5709	Kuri	28.3943	26.7356	28.0045	19.4291
alos11178	N/A	N/A	ALAV2A093083030	2007-10-24	0.256741	0	5960	5616	5792.51	5791	Langkamu	18.6643	17.9933	19.4366	101.45
alos11179	ALPSMN260833030	2010-12-17	ALAV2A093083030	2007-10-24	0.209385	0	5836	5541	5650.07	5646	Kuri	23.3858	22.728	24.4132	45.7711
alos11180	ALPSMN260833030	2010-12-17	ALAV2A093083030	2007-10-24	0.0720893	0	4939	4740	4840.62	4836	Kuri	28.3265	27.0224	29.8567	73.7169
alos11181	ALPSMN260833030	2010-12-17	ALAV2A093083030	2007-10-24	1.73268	0.216149	6115	4827	5407.03	5376	Kuri	24.4583	27.4303	21.3661	39.7385
alos11182	N/A	N/A	ALAV2A093083030	2007-10-24	0.126102	0	5801	5599	5692.02	5688	Langkamu	21.3348	26.9115	14.9232	348.489
alos11183	N/A	N/A	ALAV2A093083030	2007-10-24	0.227019	0	6112	5757	5948.7	5952	Kuri	34.3817	32.0563	36.3983	156.266
alos11184	N/A	N/A	ALAV2A093083030	2007-10-24	1.26033	0	6109	5443	5740.8	5739	Langkamu	23.8615	26.1325	21.3117	21.6043
alos11185	ALPSMN260833030	2010-12-17	ALAV2A093083030	2007-10-24	0.137755	0	5389	5231	5304.46	5302	Kuri	27.502	30.1353	26.0593	164.249
alos11186	N/A	N/A	ALAV2A093083030	2007-10-24	0.893671	0	6026	5529	5727.11	5726	Kuri	17.9954	16.9819	19.1142	80.534
alos11187	ALPSMN260833030	2010-12-17	ALAV2A093083030	2007-10-24	2.14665	0.18167	6049	4637	5287.46	5189	Kuri	21.9571	26.092	17.4875	52.987
alos11188	ALPSMN260833030	2010-12-17	ALAV2A093083030	2007-10-24	1.59825	0	5443	4704	5171.73	5190	Kuri	21.6985	21.3434	21.4969	114.983
alos11189	ALPSMN260833030	2010-12-17	ALAV2A093083030	2007-10-24	0.116786	0	5187	4822	4979.23	4983	Kuri	30.5429	31.5076	29.6901	74.0242
alos11190	N/A	N/A	ALAV2A093083030	2007-10-24	0.0734454	0	5847	5550	5723.21	5732	Kuri	35.102	33.5759	36.0055	5.41518
alos11191	N/A	N/A	ALAV2A093083030	2007-10-24	0.199311	0	5753	5476	5623.3	5635	Kuri	21.7565	19.316	25.9501	20.1879
alos11192	N/A	N/A	ALAV2A093083030	2007-10-24	0.124064	0	5872	5585	5713.96	5717	Kuri	28.4794	29.3566	28.2755	1.37274
alos11193	N/A	N/A	ALAV2A093083030	2007-10-24	0.363106	0	6032	5442	5710.75	5697	Kuri	28.4706	34.224	22.4212	303.778
alos11194	N/A	N/A	ALAV2A093083030	2007-10-24	0.827722	0	6052	5344	5682.02	5662	Kuri	30.657	35.3293	25.2784	348.402
alos11195	ALPSMN260833030	2010-12-17	ALAV2A093083030	2007-10-24	0.0748021	0	5729	5483	5628.29	5644	Kuri	29.2255	19.9536	36.8934	258.683
alos11196	ALPSMN260833030	2010-12-17	ALAV2A093083030	2007-10-24	0.131187	0	5729	5371	5581.67	5606	Kuri	33.4137	28.0727	37.5499	124.336
alos11197	N/A	N/A	ALAV2A093083030	2007-10-24	0.159103	0	6042	5801	5928.62	5940	Kuri	31.9813	32.2223	32.6208	159.309
alos11198	ALPSMN260833030	2010-12-17	ALAV2A093083030	2007-10-24	0.744442	0	5718	4985	5410.49	5427	Kuri	31.7273	31.9566	30.5551	354.921
alos11199	N/A	N/A	ALAV2A093083030	2007-10-24	0.172177	0	6038	5512	5735.28	5711	Kuri	25.1886	25.4494	25.6072	30.2311
alos11200	N/A	N/A	ALAV2A093083030	2007-10-24	0.657192	0	6049	5339	5706.54	5719	Kuri	22.2034	24.3545	19.6699	87.5951
alos11201	N/A	N/A	ALAV2A093083030	2007-10-24	0.377263	0	6016	5414	5706.76	5698	Kuri	30.3731	30.4991	28.8315	14.9403
alos11202	ALPSMN260833030	2010-12-17	ALAV2A093083030	2007-10-24	0.332039	0	5668	5288	5422.62	5408	Kuri	24.3955	29.5722	19.3034	98.5232
alos11203	ALPSMN260833035	2010-12-17	ALAV2A200443040	2009-10-29	0.0824706	0	5210	4958	5043.1	5021	Kuri	33.4724	43.8656	21.4029	333.133
alos11204	ALPSMN260833035	2010-12-17	ALAV2A200443040	2009-10-29	0.433238	0	5502	5158	5337.52	5348	Kuri	28.4039	27.9602	28.7888	18.3555
alos11205	ALPSMN260833035	2010-12-17	ALAV2A211383040	2010-01-12	0.0824868	0	5079	4825	4934.1	4921	Kuri	31.0597	36.0752	24.1604	326.109
alos11206	N/A	N/A	ALAV2A093083030	2007-10-24	0.214106	0	5872	5542	5670.68	5644	Kuri	28.252	33.1452	23.2112	272.062
alos11207	N/A	N/A	ALAV2A093083030	2007-10-24	0.0567252	0	5866	5518	5726.27	5730	Kuri	38.1765	34.8917	39.2922	341.567
alos11208	N/A	N/A	ALAV2A093083030	2007-10-24	0.0253164	0	5644	5558	5596.45	5594	Kuri	29.4447	32.4449	21.9656	182.42
alos11209	ALPSMN260833035	2010-12-17	ALAV2A211383040	2010-01-12	0.419925	0	5212	4829	4980.08	4976	Kuri	26.814	30.2209	21.876	345.963
alos11210	ALPSMN260833035	2010-12-17	ALAV2A211383040	2010-01-12	0.239096	0	5430	5009	5205.26	5185	Kuri	23.6304	24.7484	23.7171	336.069
alos11211	ALPSMN260833035	2010-12-17	ALAV2A211383040	2010-01-12	0.0653787	0	5238	5069	5157.06	5151	Kuri	27.5398	27.2142	30.6901	116.947
alos11212	ALPSMN260833035	2010-12-17	ALAV2A211383040	2010-01-12	0.47861	0	5271	4985	5091.23	5092	Kuri	15.2827	16.5361	13.523	325.911
alos11213	ALPSMN260833035	2010-12-17	ALAV2A211383040	2010-01-12	0.207601	0	5277	5006	5149.18	5142	Kuri	21.644	21.6494	21.2545	97.1324
alos11214	ALPSMN260833035	2010-12-17	ALAV2A211383040	2010-01-12	0.318902	0	5180	4870	5029.39	5030	Kuri	19.8798	21.6052	16.8986	32.3891
alos11215	ALPSMN260833035	2010-12-17	ALAV2A211383040	2010-01-12	0.328058	0	5405	5048	5253.81	5263	Kuri	32.3312	27.5329	34.8193	81.25
alos11216	ALPSMN260833035	2010-12-17	ALAV2A211383040	2010-01-12	0.18183	0	5276	4983	5102.07	5104	Kuri	24.657	25.6463	23.3755	95.6501
alos11217	ALPSMN260833040	2010-12-17	ALAV2A211383040	2010-01-12	0.0225294	0	5231	5112	5180.21	5180	Kuri	30.3374	31.0296	29.2867	293.559
alos11218	ALPSMN260833035	2010-12-17	ALAV2A211383040	2010-01-12	0.0757044	0	5422	5194	5357.3	5387	Kuri	20.0873	10.8669	28.1949	283.673
alos11219	ALPSMN260833035	2010-12-17	ALAV2A211383040	2010-01-12	0.75839	0	5169	4789	5004.32	5019	Kuri	15.8732	16.7591	14.2821	358.659
alos11220	ALPSMN260833040	2010-12-17	ALAV2A211383040	2010-01-12	0.018765	0	5293	5139	5236	5243	Kuri	38.9122	32.0654	42.2116	350.388
alos11221	ALPSMN260833040	2010-12-17	ALAV2A211383040	2010-01-12	0.0205198	0	4969	4939	4951.09	4951	Kuri	13.3557	12.0905	15.4831	84.6586
alos11222	ALPSMN260833035	2010-12-17	ALAV2A211383040	2010-01-12	0.0604892	0	5215	4983	5128.75	5150	Kuri	34.1152	26.7096	39.5771	36.4895
alos11223	ALPSMN260833040	2010-12-17	ALAV2A211383040	2010-01-12	0.102608	0	5270	5143	5205.63	5213	Kuri	18.4968	15.587	22.2227	211.897
alos11224	ALPSMN260833040	2010-12-17	ALAV2A211383040	2010-01-12	0.13505	0	5265	4947	5091.5	5079	Kuri	30.9644	30.6258	30.0393	23.0132
alos11225	ALPSMN260833035	2010-12-17	ALAV2A211383040	2010-01-12	0.816166	0	5239	4557	4923.26	4974	Kuri	24.6349	25.0658	23.8024	7.89811
alos11226	ALPSMN260833040	2010-12-17	ALAV2A211383040	2010-01-12	0.0107546	0	5211	5134	5175.86	5168	Kuri	32.3584	24.7562	33.1001	90.235
alos11227	ALPSMN260833035	2010-12-17	ALAV2A211383040	2010-01-12	0.235264	0	5479	5214	5376.56	5386	Kuri	23.5148	22.929	23.9071	347.92
alos11228	ALPSMN260833035	2010-12-17	ALAV2A211383040	2010-01-12	0.0821307	0	5086	4926	5019.54	5022	Kuri	24.2799	25.0256	22.5888	21.0266
alos11229	ALPSMN260833035	2010-12-17	ALAV2A211383040	2010-01-12	0.170356	0	5299	4911	5166.08	5168	Kuri	34.1479	30.2494	36.0488	74.1032
alos11230	ALPSMN260833040	2010-12-17	ALAV2A211383040	2010-01-12	0.0809115	0	4920	4758	4845.79	4844	Kuri	26.9744	23.6336	33.958	59.4314
alos11231	ALPSMN260833035	2010-12-17	ALAV2A211383040	2010-01-12	0.0794722	0	5470	5158	5346.92	5356	Kuri	26.271	21.337	28.6378	15.8351
alos11232	ALPSMN260833040	2010-12-17	ALAV2A211383040	2010-01-12	0.104466	0	4988	4703	4843.15	4835	Kuri	31.033	36.4963	23.9719	358.985
alos11233	ALPSMN260833035	2010-12-17	ALAV2A211383040	2010-01-12	0.211097	0	5472	5119	5267.62	5248	Kuri	29.5174	28.7874	29.6462	351.38
alos11234	ALPSMN260833035	2010-12-17	ALAV2A211383040	2010-01-12	0.111265	0	5231	5106	5177.33	5181	Kuri	22.3529	19.4379	22.5817	315.233
alos11235	ALPSMN260833035	2010-12-17	ALAV2A211383040	2010-01-12	0.258836	0	5182	5055	5125.26	5128	Kuri	18.5305	16.5253	20.8942	14.162
alos11236	ALPSMN260833035	2010-12-17	ALAV2A211383040	2010-01-12	0.159309	0	5234	5073	5143.24	5145	Kuri	19.0432	14.5903	22.4952	233.616
alos11237	ALPSMN260833035	2010-12-17	ALAV2A211383040	2010-01-12	0.0491427	0	5220	5097	5160.31	5160	Kuri	27.0255	28.4414	28.2063	137.587
alos11238	ALPSMN260833035	2010-12-17	ALAV2A211383040	2010-01-12	0.159447	0	5260	4952	5115.26	5115	Kuri	31.8	27.1478	33.725	62.5689
alos11239	ALPSMN260833040	2010-12-17	ALAV2A211383040	2010-01-12	0.38363	0	5078	4726	4840.81	4814	Kuri	14.0632	15.6463	11.6777	82.3705
alos11240	ALPSMN260833035	2010-12-17	ALAV2A211383040	2010-01-12	0.140866	0	4922	4674	4794.24	4797	Kuri	26.08	28.4555	24.5494	61.2927
alos11241	ALPSMN260833040	2010-12-17	ALAV2A211383040	2010-01-12	0.0607099	0	4978	4852	4930.45	4937	Kuri	26.7769	23.9274	27.14	33.4782
alos11242	ALPSMN260833035	2010-12-17	ALAV2A211383040	2010-01-12	1.7472	0.966721	5419	4850	5130.15	5133	Kuri	20.8998	22.21	19.652	322.624
alos11243	N/A	N/A	ALAV2A093083030	2007-10-24	0.0754684	0	5862	5717	5801.2	5804	Langkamu	29.3673	24.2156	32.3468	19.0542
alos11244	N/A	N/A	ALAV2A093083030	2007-10-24	0.211312	0	5901	5658	5805.21	5811	Langkamu	15.7006	13.9281	17.867	36.3183
alos11245	ALPSMN260833040	2010-12-17	ALAV2A211383040	2010-01-12	0.0734801	0	4910	4653	4773.81	4750	Kuri	35.0014	41.9125	31.6273	72.3935
alos11246	ALPSMN260833035	2010-12-17	ALAV2A211383040	2010-01-12	0.227493	0.0210388	5440	5050	5270.45	5286	Kuri	28.7512	26.5444	29.0624	180
alos11247	ALPSMN260833035	2010-12-17	ALAV2A211383040	2010-01-12	0.235097	0	5384	4974	5147.28	5158	Kuri	27.7128	27.504	27.3293	344.253
alos11248	ALPSMN260833035	2010-12-17	ALAV2A211383040	2010-01-12	0.331444	0	5455	4901	5257.08	5263	Kuri	22.5715	22.2747	22.9611	359.744
alos11249	ALPSMN260833035	2010-12-17	ALAV2A211383040	2010-01-12	0.130914	0	5442	5021	5223.75	5234	Kuri	24.1748	23.1096	25.5065	1.30406
alos11250	ALPSMN260833035	2010-12-17	ALAV2A211383040	2010-01-12	0.237068	0.0243531	5555	5050	5350.52	5374	Kuri	29.8988	26.579	32.8213	144.879
alos11251	ALPSMN260833035	2010-12-17	ALAV2A211383040	2010-01-12	0.453469	0	5497	4961	5180.82	5187	Kuri	21.8854	21.5829	21.1587	328.685
alos11252	ALPSMN260833035	2010-12-17	ALAV2A211383040	2010-01-12	0.148504	0	5549	5212	5382.32	5366	Kuri	25.5957	26.3574	25.8562	279.264
alos11253	ALPSMN260833035	2010-12-17	ALAV2A211383040	2010-01-12	0.296823	0	5303	4998	5191.29	5192	Kuri	22.6385	25.6957	18.711	262.123
alos11254	ALPSMN260833035	2010-12-17	ALAV2A211383040	2010-01-12	0.57436	0	5497	4795	5236.34	5278	Kuri	20.874	15.0048	26.1155	123.723
alos11255	ALPSMN260833035	2010-12-17	ALAV2A211383040	2010-01-12	0.172972	0	5158	5014	5112.12	5118	Kuri	18.1781	16.4454	19.3543	241.243
alos11256	ALPSMN260833035	2010-12-17	ALAV2A211383040	2010-01-12	3.732	0	5569	4998	5321.36	5346	Kuri	16.1296	16.5319	15.8704	349.125
alos11257	ALPSMN260833035	2010-12-17	ALAV2A211383040	2010-01-12	0.287414	0	5249	4940	5068.03	5087	Kuri	18.1636	17.5423	17.7839	298.853
alos11258	ALPSMN260833035	2010-12-17	ALAV2A211383040	2010-01-12	0.297128	0	5190	4967	5067.32	5062	Kuri	16.572	18.1197	13.909	303.945
alos11259	ALPSMN260833035	2010-12-17	ALAV2A211383040	2010-01-12	0.892603	0	5421	4855	5137.88	5126	Kuri	16.8361	18.6987	14.6836	101.873
alos11260	ALPSMN260833035	2010-12-17	ALAV2A211383040	2010-01-12	0.128631	0	5720	5380	5555.91	5567	Kuri	35.91	33.0546	39.4117	23.0606
alos11261	ALPSMN260833035	2010-12-17	ALAV2A211383040	2010-01-12	0.0629836	0	5502	5377	5440.4	5443	Kuri	21.0222	22.8439	20.0541	54.9305
alos11262	ALPSMN260833035	2010-12-17	ALAV2A211383040	2010-01-12	0.535731	0	5685	5178	5464.73	5463	Kuri	21.022	18.9693	23.0413	286.956
alos11263	ALPSMN260833035	2010-12-17	ALAV2A211383040	2010-01-12	0.225649	0	5168	4921	5037.04	5030	Kuri	19.3445	21.0482	17.4979	286.663
alos11264	ALPSMN260833035	2010-12-17	ALAV2A211383040	2010-01-12	0.290581	0	5742	5188	5481.79	5477	Kuri	31.3903	31.8808	30.1802	14.5693
alos11265	ALPSMN260833035	2010-12-17	ALAV2A211383040	2010-01-12	0.442417	0	5693	5267	5530.01	5548	Kuri	19.9451	16.0383	23.955	295.96
alos11266	ALPSMN260833035	2010-12-17	ALAV2A211383040	2010-01-12	0.250752	0	5155	4835	4961.15	4951	Kuri	17.4667	21.4398	12.9484	313.855
alos11267	ALPSMN260833035	2010-12-17	ALAV2A211383040	2010-01-12	9.82966	0.0737376	5836	4603	5201.05	5211	Kuri	17.8562	20.4614	14.9342	155.315
alos11268	ALPSMN260833030	2010-12-17	ALAV2A211383030	2010-01-12	0.598918	0	5798	5220	5507.51	5513	Kuri	26.2289	27.2484	24.5373	298.281
alos11269	ALPSMN260833035	2010-12-17	ALAV2A211383040	2010-01-12	0.187453	0	5165	4819	4990.38	4983	Kuri	22.4535	19.268	25.7711	67.5625
alos11270	ALPSMN260833030	2010-12-17	ALAV2A211383030	2010-01-12	0.0696739	0	5713	5610	5665.58	5665	Kuri	17.7329	18.0658	19.1069	256.294
alos11271	ALPSMN260833030	2010-12-17	ALAV2A211383030	2010-01-12	0.0334996	0	5790	5591	5735.3	5749	Kuri	32.7589	24.6456	40.7192	285.225
alos11272	ALPSMN260833030	2010-12-17	ALAV2A211383030	2010-01-12	0.211104	0	5848	5393	5673.42	5707	Kuri	29.0846	25.1791	32.572	291.158
alos11273	ALPSMN260833035	2010-12-17	ALAV2A211383040	2010-01-12	0.219612	0	5809	5250	5513.57	5514	Kuri	31.5585	32.9207	30.1501	19.0152
alos11274	ALPSMN260833030	2010-12-17	ALAV2A211383030	2010-01-12	0.0760411	0	5802	5590	5713.08	5719	Kuri	24.4094	18.4613	30.6066	282.703
alos11275	ALPSMN260833030	2010-12-17	ALAV2A211383030	2010-01-12	0.0421984	0	5628	5440	5518.85	5506	Kuri	38.5161	45.3916	32.069	349.094
alos11276	ALPSMN260833030	2010-12-17	ALAV2A211383030	2010-01-12	0.422642	0	5824	5287	5532.95	5516	Kuri	26.2318	29.2457	22.679	86.7904
alos11277	ALPSMN260833030	2010-12-17	ALAV2A211383030	2010-01-12	0.0995258	0	5850	5457	5647.82	5648	Kuri	32.2447	36.2709	28.0895	122.166
alos11278	ALPSMN260833035	2010-12-17	ALAV2A211383040	2010-01-12	1.54809	0.421841	5851	4878	5315.65	5290	Kuri	24.6252	28.9873	19.9688	43.3076
alos11279	ALPSMN260833030	2010-12-17	ALAV2A211383030	2010-01-12	0.14227	0	5462	5246	5368.51	5368	Kuri	27.6049	28.4063	26.9299	2.77542
alos11280	ALPSMN260833035	2010-12-17	ALAV2A211383040	2010-01-12	0.338193	0	5590	5195	5424.13	5438	Kuri	21.7069	21.1742	21.4717	77.8083
alos11281	ALPSMN260833035	2010-12-17	ALAV2A211383040	2010-01-12	0.46256	0	5497	4986	5215.47	5214	Kuri	22.4222	25.7021	19.093	68.1568
alos11282	ALPSMN260833035	2010-12-17	ALAV2A211383040	2010-01-12	0.0947166	0	5448	5018	5291.24	5328	Kuri	32.7338	28.8098	34.6378	252.274
alos11283	ALPSMN260833035	2010-12-17	ALAV2A211383040	2010-01-12	0.318674	0	5438	4935	5186.53	5186	Kuri	30.048	31.4414	28.5285	257.16
alos11284	ALPSMN260833035	2010-12-17	ALAV2A211383040	2010-01-12	2.94699	0	5598	4807	5186.73	5139	Kuri	17.0195	21.8138	11.7784	298.917
alos11285	ALPSMN260833035	2010-12-17	ALAV2A211383040	2010-01-12	0.086432	0	5340	5013	5170.29	5173	Kuri	33.5077	37.1214	29.1403	209.193
alos11286	ALPSMN260833035	2010-12-17	ALAV2A211383040	2010-01-12	0.0601417	0	5259	5067	5151.34	5148	Kuri	27.7277	31.8072	25.9855	355.074
alos11287	ALPSMN271773040	2011-03-02	ALAV2A211383040	2010-01-12	0.135567	0	5317	4860	5068.07	5010	Kuri	31.4957	34.8782	26.8486	284.685
alos11288	ALPSMN271773040	2011-03-02	ALAV2A211383040	2010-01-12	0.116053	0	5324	4931	5143.29	5142	Kuri	32.9681	33.6524	32.4662	284.059
alos11289	ALPSMN271773040	2011-03-02	ALAV2A211383040	2010-01-12	0.0393088	0	5327	5101	5236.17	5236	Kuri	36.729	32.9267	42.1693	300.554
alos11290	ALPSMN260833035	2010-12-17	ALAV2A211383040	2010-01-12	0.294682	0	5581	4818	5227.07	5227	Kuri	33.5	29.453	35.7693	338.903
alos11291	ALPSMN271773040	2011-03-02	ALAV2A211383040	2010-01-12	0.138986	0	5269	4973	5106.62	5093	Kuri	28.882	30.6596	26.7406	356.668
alos11292	ALPSMN271773035	2011-03-02	ALAV2A211383040	2010-01-12	0.259299	0	5525	5256	5392.24	5395	Kuri	30.4113	25.3637	36.0635	334.944
alos11293	ALPSMN271773040	2011-03-02	ALAV2A211383040	2010-01-12	0.019968	0	4988	4952	4967.33	4966	Kuri	14.5887	17.6294	11.3374	196.671
alos11294	ALPSMN271773040	2011-03-02	ALAV2A211383040	2010-01-12	0.218155	0	5139	4891	5034.62	5045	Dangme	20.8189	19.1569	22.5968	86.8559
alos11295	ALPSMN271773035	2011-03-02	ALAV2A211383040	2010-01-12	2.85267	0.0444677	5558	4549	5115.28	5140	Kuri	23.6013	25.9923	21.3402	103.653
alos11296	ALPSMN271773040	2011-03-02	ALAV2A211383040	2010-01-12	0.312543	0	5064	4802	4935.1	4939	Dangme	23.3591	24.8396	22.1105	92.3185
alos11297	ALPSMN271773040	2011-03-02	ALAV2A211383040	2010-01-12	0.0207219	0	5135	5058	5108.52	5111	Kuri	24.5793	16.3062	33.4281	271.737
alos11298	ALPSMN271773040	2011-03-02	ALAV2A211383040	2010-01-12	0.0611238	0	5130	5074	5112.27	5119	Kuri	19.8607	17.3416	22.3574	277.022
alos11299	ALPSMN260833030	2010-12-17	ALAV2A211383030	2010-01-12	0.130682	0	5701	5388	5561.86	5570	Kuri	24.9945	25.0287	24.0105	69.3529
alos11300	ALPSMN271773040	2011-03-02	ALAV2A211383040	2010-01-12	0.0999546	0	5111	4887	4993.66	4989	Dangme	29.7915	29.304	29.7299	63.8132
alos11301	ALPSMN271773035	2011-03-02	ALAV2A211383040	2010-01-12	0.123697	0	5214	4888	5029.45	5023	Kuri	24.4178	21.9497	26.3036	101.703
alos11302	ALPSMN271773035	2011-03-02	ALAV2A211383040	2010-01-12	0.243076	0	5142	4843	5027.03	5040	Kuri	26.4937	22.2008	29.1839	61.6573
alos11303	ALPSMN271773040	2011-03-02	ALAV2A211383040	2010-01-12	0.0199203	0	5047	4970	5013.29	5018	Kuri	24.9427	22.6182	26.6878	320.609
alos11304	ALPSMN271773040	2011-03-02	ALAV2A211383040	2010-01-12	0.0800602	0	5169	4893	5060.55	5065	Kuri	26.4857	20.9028	32.0138	326.158
alos11305	ALPSMN271773040	2011-03-02	ALAV2A211383040	2010-01-12	0.0160433	0	5094	4964	5040.68	5051	Kuri	27.7251	26.3322	30.2311	268.661
alos11306	ALPSMN271773040	2011-03-02	ALAV2A211383040	2010-01-12	0.0180839	0	5007	4934	4983.14	4986	Dangme	16.0063	11.8194	18.1016	0.57296
alos11307	ALPSMN271773040	2011-03-02	ALAV2A211383040	2010-01-12	0.0421277	0	5073	4946	5023.98	5026	Kuri	22.4988	23.2387	24.7626	295.063
alos11308	ALPSMN271773040	2011-03-02	ALAV2A211383040	2010-01-12	0.0827622	0	5072	4938	5008.21	5010	Kuri	18.5879	18.0295	19.656	349.742
alos11309	ALPSMN271773040	2011-03-02	ALAV2A211383040	2010-01-12	0.0383889	0	5004	4900	4958.74	4966	Dangme	18.9666	14.8865	18.8858	21.0499
alos11310	ALPSMN271773040	2011-03-02	ALAV2A211383040	2010-01-12	0.0777205	0	5137	4985	5055.01	5056	Kuri	22.5026	22.8274	20.5461	6.71111
alos11311	ALPSMN271773035	2011-03-02	ALAV2A211383040	2010-01-12	0.129615	0	5139	4882	5014.96	5015	Kuri	29.0695	30.9138	26.4022	357.518
alos11312	ALPSMN271773040	2011-03-02	ALAV2A211383040	2010-01-12	0.0446767	0	5034	4824	4947.8	4973	Dangme	20.9241	18.9644	23.0489	352.463
alos11313	ALPSMN271773040	2011-03-02	ALAV2A211383040	2010-01-12	0.025042	0	5017	4896	4945.38	4935	Kuri	31.7621	40.4243	21.481	40.6682
alos11314	ALPSMN271773040	2011-03-02	ALAV2A211383040	2010-01-12	0.129881	0	5112	4885	4991.47	4995	Dangme	28.4718	28.439	27.4879	78.8223
alos11315	ALPSMN271773040	2011-03-02	ALAV2A211383040	2010-01-12	0.0125614	0	5086	4987	5050.87	5060	Kuri	29.5017	18.4202	32.5673	21.7963
alos11316	ALPSMN271773040	2011-03-02	ALAV2A211383040	2010-01-12	0.0522529	0	5028	4760	4896.28	4892	Dangme	27.1742	26.5462	24.605	37.0692
alos11317	ALPSMN271773040	2011-03-02	ALAV2A211383040	2010-01-12	0.0209863	0	5084	4977	5036.09	5034	Kuri	27.8959	29.5715	32.3661	89.4063
alos11318	ALPSMN271773035	2011-03-02	ALAV2A211383040	2010-01-12	0.745675	0	5294	4895	5099.05	5110	Kuri	21.2184	24.3516	18.3525	344.577
alos11319	ALPSMN093083030	2007-10-24	ALAV2A211383030	2010-01-12	0.0278179	0	5567	5442	5487.52	5481	Kuri	32.215	39.4068	23.7887	22.5279
alos11320	ALPSMN093083030	2007-10-24	ALAV2A211383030	2010-01-12	0.0336245	0	5538	5391	5476.08	5478	Kuri	37.6749	39.4288	37.8294	344.215
alos11321	ALPSMN271773035	2011-03-02	ALAV2A211383040	2010-01-12	0.322825	0.219791	5842	4819	5068.35	4986	Kuri	25.727	31.318	18.4974	253.376
alos11322	ALPSMN093083030	2007-10-24	ALAV2A211383030	2010-01-12	0.0750641	0	5666	5484	5565.6	5564	Kuri	29.3091	28.2965	28.4753	346.102
alos11323	ALPSMN271773035	2011-03-02	ALAV2A211383040	2010-01-12	0.127557	0.0403039	5357	4974	5173.81	5160	Kuri	31.0222	31.2935	30.0537	256.299
alos11324	ALPSMN271773035	2011-03-02	ALAV2A211383040	2010-01-12	0.0177083	0	5694	5580	5628.3	5617	Kuri	36.2087	37.355	34.8246	321.725
alos11325	ALPSMN271773035	2011-03-02	ALAV2A211383040	2010-01-12	0.0360318	0	5741	5541	5634.74	5628	Kuri	24.811	23.8614	23.8538	254.056
alos11326	ALPSMN271773035	2011-03-02	ALAV2A211383040	2010-01-12	0.104519	0	6131	5477	5758.57	5745	Kuri	38.036	39.8754	35.9346	273.594
alos11327	ALPSMN271773035	2011-03-02	ALAV2A211383040	2010-01-12	0.187314	0	6131	5521	5870.73	5868	Kuri	33.8889	34.9005	32.7689	300.764
alos11328	ALPSMN271773035	2011-03-02	ALAV2A211383040	2010-01-12	0.642532	0.0184286	5913	5364	5606.68	5589	Kuri	23.4212	30.193	16.7831	316.966
alos11329	ALPSMN271773035	2011-03-02	ALAV2A211383040	2010-01-12	0.0604948	0	5760	5597	5696.08	5703	Kuri	33.8236	29.762	40.2437	325.191
alos11330	ALPSMN271773035	2011-03-02	ALAV2A211383040	2010-01-12	0.809079	0.0654795	5478	4924	5221.94	5248	Kuri	23.1942	19.369	26.7697	133.846
alos11331	ALPSMN271773035	2011-03-02	ALAV2A211383040	2010-01-12	0.780518	0.029435	5915	5302	5587.92	5610	Dangme	20.2688	20.193	20.0091	173.898
alos11332	ALPSMN271773035	2011-03-02	ALAV2A211383040	2010-01-12	4.48077	0.282414	5854	4864	5360.81	5354	Dangme	18.1824	20.0677	16.0755	54.6044
alos11333	ALPSMN271773035	2011-03-02	ALAV2A211383040	2010-01-12	0.212049	0	5723	5436	5592.54	5578	Kuri	22.3614	21.1203	21.8506	303.3
alos11334	ALPSMN271773035	2011-03-02	ALAV2A211383040	2010-01-12	0.556011	0.0857332	6125	5408	5634.19	5583	Dangme	18.437	23.6803	12.791	64.7791
alos11335	ALPSMN271773040	2011-03-02	ALAV2A211383040	2010-01-12	0.0531332	0	5043	4940	4993.64	4996	Dangme	21.796	20.0916	21.9163	205.994
alos11336	ALPSMN271773035	2011-03-02	ALAV2A211383040	2010-01-12	0.0706161	0	5719	5608	5673.78	5673	Dangme	22.5004	22.0326	24.8147	68.228
alos11337	ALPSMN271773040	2011-03-02	ALAV2A211383040	2010-01-12	0.099643	0	5154	4990	5102.05	5114	Dangme	17.2761	13.4375	20.3714	169.518
alos11338	ALPSMN271773040	2011-03-02	ALAV2A211383040	2010-01-12	0.536125	0	5166	4868	5038.08	5034	Kuri	19.2521	20.5626	17.1452	358.826
alos11339	ALPSMN271773035	2011-03-02	ALAV2A211383040	2010-01-12	1.25115	0.345809	6205	5292	5760.2	5776	Kuri	24.041	27.3533	20.14	259.9
alos11340	ALPSMW090603035	2007-10-07	ALAV2A211383040	2010-01-12	0.538605	0	6192	5305	5643.92	5615	Dangme	23.3695	25.5569	21.2214	131.936
alos11341	ALPSMN271773035	2011-03-02	ALAV2A211383040	2010-01-12	0.143779	0	5777	5354	5566.48	5557	Kuri	34.5246	34.8452	33.4994	348.735
alos11342	ALPSMN271773040	2011-03-02	ALAV2A211383040	2010-01-12	0.242622	0	5174	4861	4979.01	4951	Dangme	21.3106	23.6294	17.7954	243.145
alos11343	ALPSMN271773035	2011-03-02	ALAV2A211383040	2010-01-12	0.243553	0	6032	5712	5933.83	5953	Kuri	27.2054	21.0163	32.1122	193.412
alos11344	ALPSMW090603035	2007-10-07	ALAV2A211383040	2010-01-12	1.04698	0.111252	6155	5143	5493.38	5463	Dangme	22.9413	25.9745	20.3164	55.6578
alos11345	ALPSMN271773040	2011-03-02	ALAV2A211383040	2010-01-12	0.115309	0	5183	5001	5100.57	5091	Kuri	26.4268	25.5998	25.5296	52.0839
alos11346	ALPSMN271773035	2011-03-02	ALAV2A211383040	2010-01-12	0.876318	0.79762	5940	4935	5152.97	5102	Kuri	13.7691	16.9886	10.2463	328.736
alos11347	ALPSMN271773035	2011-03-02	ALAV2A211383040	2010-01-12	0.791979	0.0706766	5620	4858	5267.3	5327	Kuri	18.7156	16.0326	21.7825	292.758
alos11348	ALPSMW090603035	2007-10-07	ALAV2A211383040	2010-01-12	0.0831241	0	5819	5410	5600.45	5594	Dangme	33.7741	41.3714	25.7419	233.3
alos11349	ALPSMW090603035	2007-10-07	ALAV2A211383040	2010-01-12	1.52193	0.00995116	6192	5565	5860.01	5837	Dangme	21.8217	27.6481	15.7381	169.56
alos11350	ALPSMN271773040	2011-03-02	ALAV2A211383040	2010-01-12	0.599723	0	5180	4825	4994.3	5000	Kuri	22.3211	21.3422	23.4495	31.2237
alos11351	ALPSMW090603035	2007-10-07	ALAV2A211383040	2010-01-12	0.630586	0	5845	5506	5675.9	5680	Dangme	17.819	18.0613	17.9606	34.2401
alos11352	ALPSMW090603035	2007-10-07	ALAV2A211383040	2010-01-12	0.0624829	0	5492	5258	5367.88	5366	Dangme	31.382	35.543	26.1412	14.6157
alos11353	ALPSMW090603035	2007-10-07	ALAV2A211383040	2010-01-12	0.649431	0	5896	5440	5696.1	5694	Dangme	17.6585	20.7408	14.406	80.9987
alos11354	ALPSMN271773035	2011-03-02	ALAV2A211383040	2010-01-12	5.62066	0.410212	6123	4744	5407.46	5379	Dangme	24.1882	28.0204	20.1291	345.318
alos11355	ALPSMW090603035	2007-10-07	ALAV2A211383040	2010-01-12	0.227765	0	6180	5624	5820.78	5814	Dangme	21.8109	24.8049	18.336	105.332
alos11356	ALPSMN271773035	2011-03-02	ALAV2A211383040	2010-01-12	1.00536	0.69742	5987	4485	5099.38	5090	Kuri	30.1926	31.2786	28.8543	228.358
alos11357	ALPSMW090603035	2007-10-07	ALAV2A211383040	2010-01-12	1.96396	0.0983745	6168	5267	5568.08	5555	Dangme	16.8442	21.5808	11.7802	71.8747
alos11358	ALPSMN271773040	2011-03-02	ALAV2A211383040	2010-01-12	0.244837	0	5007	4771	4880.69	4865	Kuri	26.7087	29.391	24.8386	27.4309
alos11359	ALPSMN271773035	2011-03-02	ALAV2A211383030	2010-01-12	0.192248	0	5728	5368	5597.39	5635	Kuri	26.6729	21.1597	30.4271	296.061
alos11360	ALPSMN271773040	2011-03-02	ALAV2A211383040	2010-01-12	0.188171	0	4920	4666	4790.34	4789	Kuri	24.2529	27.0342	21.0718	37.4331
alos11361	ALPSMW090603035	2007-10-07	ALAV2A211383040	2010-01-12	0.208109	0	5988	5495	5804.11	5829	Kuri	34.6181	29.3159	40.9977	264.169
alos11362	ALPSMW090603035	2007-10-07	ALAV2A211383040	2010-01-12	0.0700442	0	5717	5455	5631.74	5652	Dangme	34.4202	26.2956	42.3861	357.516
alos11363	ALPSMN271773035	2011-03-02	ALAV2A211383040	2010-01-12	2.07572	0.681069	6205	4553	5272.69	5220	Kuri	30.552	37.0461	23.6144	234.861
alos11364	ALPSMW090603035	2007-10-07	ALAV2A211383040	2010-01-12	0.193787	0	5962	5258	5712.8	5752	Kuri	37.6775	33.3625	41.9087	320.729
alos11365	ALPSMW090603035	2007-10-07	ALAV2A211383040	2010-01-12	0.11293	0	5915	5420	5683.24	5673	Kuri	40.4584	41.1748	39.3926	309.228
alos11366	ALPSMW090603035	2007-10-07	ALAV2A211383040	2010-01-12	0.0668675	0	5781	5460	5645.6	5664	Dangme	40.4348	37.2554	43.2725	346.726
alos11367	ALPSMN271773040	2011-03-02	ALAV2A211383040	2010-01-12	0.398184	0	5250	4729	4912.67	4837	Kuri	24.852	34.4983	15.734	347.95
alos11368	ALPSMW090603035	2007-10-07	ALAV2A211383040	2010-01-12	0.0670453	0	5936	5590	5784.38	5787	Dangme	46.5363	46.7244	47.1193	345.938
alos11369	ALPSMW090603035	2007-10-07	ALAV2A211383040	2010-01-12	0.0200447	0	5622	5390	5514.26	5525	Kuri	36.0878	36.936	34.5715	333.856
alos11370	ALPSMW090603035	2007-10-07	ALAV2A211383040	2010-01-12	0.0281975	0	5674	5564	5647.44	5658	Kuri	25.2187	11.9931	45.5096	9.95428
alos11371	ALPSMW090603035	2007-10-07	ALAV2A211383040	2010-01-12	0.0625392	0	5817	5576	5737.7	5741	Dangme	37.9422	30.1898	46.3301	336.058
alos11372	ALPSMW090603035	2007-10-07	ALAV2A211383030	2010-01-12	0.0138337	0	5654	5572	5627.33	5638	Kuri	32.3137	18.5842	47.9399	351.094
alos11373	ALPSMW090603035	2007-10-07	ALAV2A211383040	2010-01-12	0.0142192	0	5665	5606	5639.56	5638	Kuri	23.4269	20.9188	33.7859	217.741
alos11374	ALPSMW090603035	2007-10-07	ALAV2A211383040	2010-01-12	0.0535198	0	5679	5413	5589.65	5603	Kuri	36.7144	32.4319	42.0444	318.265
alos11375	ALPSMW090603035	2007-10-07	ALAV2A211383040	2010-01-12	1.53871	0	5983	5282	5666.73	5683	Dangme	20.974	24.0548	17.5593	9.22515
alos11376	ALPSMW090603035	2007-10-07	ALAV2A211383040	2010-01-12	0.0399658	0	5791	5549	5642.14	5619	Dangme	34.5977	46.076	30.0335	66.478
alos11377	ALPSMW090603035	2007-10-07	ALAV2A211383040	2010-01-12	0.0523111	0	5709	5575	5655.02	5655	Dangme	24.3622	20.9846	28.9322	309.902
alos11378	ALPSMN271773040	2011-03-02	ALAV2A211383040	2010-01-12	0.464506	0	5244	4930	5105.77	5114	Dangme	19.3897	15.0042	23.9239	118.127
alos11379	ALPSMW090603035	2007-10-07	ALAV2A211383040	2010-01-12	0.176724	0	5698	5322	5518.76	5522	Dangme	31.3035	34.9403	26.3998	1.78638
alos11380	ALPSMN271773040	2011-03-02	ALAV2A211383040	2010-01-12	1.30774	0	5527	4930	5169.33	5161	Kuri	23.895	25.7536	21.5384	278.118
alos11381	ALPSMW090603035	2007-10-07	ALAV2A211383040	2010-01-12	0.0990022	0	5702	5393	5567.47	5576	Kuri	34.6773	30.595	38.8396	335.678
alos11382	ALPSMN271773035	2011-03-02	ALAV2A211383040	2010-01-12	3.71762	0.763834	5780	4522	5232.63	5298	Kuri	25.1508	27.7172	22.3087	240.46
alos11383	ALPSMW090603035	2007-10-07	ALAV2A211383040	2010-01-12	0.0282897	0	5708	5541	5610.71	5601	Dangme	41.4927	47.5889	43.2526	60.2951
alos11384	ALPSMN271773035	2011-03-02	ALAV2A211383040	2010-01-12	0.701738	0.293316	5800	5303	5552.54	5552	Dangme	18.1262	18.9499	16.6015	67.1788
alos11385	ALPSMW090603035	2007-10-07	ALAV2A211383040	2010-01-12	0.201963	0	5795	5379	5567.39	5548	Dangme	30.6256	34.8561	26.4156	15.4479
alos11386	ALPSMW090603035	2007-10-07	ALAV2A211383040	2010-01-12	0.046786	0	5636	5410	5537.9	5545	Dangme	30.2071	27.7196	32.7791	0.268741
alos11387	ALPSMN271773040	2011-03-02	ALAV2A211383040	2010-01-12	0.344003	0	5344	5056	5187.34	5180	Dangme	27.379	27.5493	27.2284	157.646
alos11388	ALPSMW090603035	2007-10-07	ALAV2A211383040	2010-01-12	0.117509	0	5838	5646	5766.25	5770	Dangme	30.6006	23.6333	39.3079	203.181
alos11389	ALPSMW090603035	2007-10-07	ALAV2A211383040	2010-01-12	0.281687	0	5729	5342	5527.54	5522	Dangme	29.6077	31.1052	26.7899	359.444
alos11390	ALPSMW090603035	2007-10-07	ALAV2A211383030	2010-01-12	0.0101679	0	5768	5721	5742.83	5744	Kuri	28.1223	22.6206	34.3223	30.569
alos11391	ALPSMN271773040	2011-03-02	ALAV2A211383040	2010-01-12	0.125331	0	5160	4978	5071.12	5070	Dangme	25.9887	24.3399	28.6603	211.394
alos11392	ALPSMN271773035	2011-03-02	ALAV2A211383040	2010-01-12	10.3573	1.87303	6395	4761	5423.51	5449	Dangme	18.0242	20.6415	15.3719	42.9215
alos11393	ALPSMN271773040	2011-03-02	ALAV2A211383040	2010-01-12	0.194865	0	5602	5285	5456.98	5469	Dangme	32.1634	33.1633	32.4342	118.918
alos11394	ALPSMW090603035	2007-10-07	ALAV2A211383040	2010-01-12	2.10337	0.0513945	6072	5264	5651.9	5646	Dangme	26.6909	34.018	19.1382	336.756
alos11395	ALPSMW090603035	2007-10-07	ALAV2A211383030	2010-01-12	0.0328778	0	5747	5632	5683.54	5682	Dangme	22.1018	23.3651	22.4103	336.018
alos11396	ALPSMW090603035	2007-10-07	ALAV2A211383040	2010-01-12	0.246232	0	6053	5630	5866.17	5863	Dangme	30.4371	32.8189	27.6875	221.98
alos11397	ALPSMN271773040	2011-03-02	ALAV2A211383040	2010-01-12	1.0903	0	5768	5087	5379.44	5361	Dangme	22.1601	27.6002	17.0897	68.0949
alos11398	ALPSMW090603035	2007-10-07	ALAV2A211383030	2010-01-12	0.183163	0	5820	5481	5648.7	5654	Kuri	24.9223	24.2368	24.4735	332.276
alos11399	ALPSMW090603035	2007-10-07	ALAV2A211383040	2010-01-12	0.0255884	0	5638	5494	5564.22	5560	Dangme	32.5933	31.1685	36.4306	16.3669
alos11400	ALPSMN271773040	2011-03-02	ALAV2A211383040	2010-01-12	0.337262	0	5869	5207	5539.64	5561	Dangme	32.2572	31.937	32.8551	145.972
alos11401	ALPSMW090603035	2007-10-07	ALAV2A211383040	2010-01-12	0.159329	0	6061	5688	5906.68	5914	Dangme	31.702	26.7648	34.2368	155.514
alos11402	ALPSMW090603035	2007-10-07	ALAV2A211383030	2010-01-12	0.179503	0	5825	5403	5611.27	5602	Dangme	29.569	29.812	28.9864	20.1718
alos11403	ALPSMW090603035	2007-10-07	ALAV2A211383040	2010-01-12	0.240969	0	5916	5416	5685.2	5685	Dangme	28.7824	33.6212	22.5513	341.899
alos11404	ALPSMN271773040	2011-03-02	ALAV2A211383040	2010-01-12	0.434245	0	5467	4781	5248.95	5309	Dangme	26.3556	17.6639	35.2094	133.629
alos11405	ALPSMN271773040	2011-03-02	ALAV2A211383040	2010-01-12	4.64245	0	5634	4884	5280.97	5286	Dangme	15.7014	13.1829	18.0237	68.6058
alos11406	ALPSMW090603035	2007-10-07	ALAV2A211383040	2010-01-12	0.0331047	0	5784	5749	5771.92	5773	Dangme	14.2913	13.4727	18.0004	102.391
alos11407	ALPSMW090603035	2007-10-07	ALAV2A211383040	2010-01-12	1.16944	0	5998	5257	5593.26	5568	Dangme	25.0762	32.0083	17.0132	2.35278
alos11408	ALPSMN271773040	2011-03-02	ALAV2A211383040	2010-01-12	0.168653	0	5623	5112	5395.6	5456	Dangme	32.0188	32.2827	31.7273	133.655
alos11409	ALPSMN271773040	2011-03-02	ALAV2A211383040	2010-01-12	0.084314	0	5624	5389	5551.04	5558	Dangme	37.4698	31.8156	37.3637	111.672
alos11410	ALPSMW090603035	2007-10-07	ALAV2A211383040	2010-01-12	1.99029	0.0421859	6110	5339	5717.02	5739	Dangme	25.5023	29.053	21.7064	206.323
alos11411	ALPSMW090603035	2007-10-07	ALAV2A211383040	2010-01-12	0.301675	0	5953	5316	5668.95	5680	Dangme	31.5851	34.4928	27.5906	343.623
alos11412	ALPSMN271773040	2011-03-02	ALAV2A211383040	2010-01-12	0.0471677	0	6253	6028	6153	6155	Dangme	37.838	33.0663	42.0636	265.546
alos11413	ALPSMW090603035	2007-10-07	ALAV2A211383040	2010-01-12	1.75897	0.17241	6292	5339	5885.71	5912	Dangme	28.8277	28.7409	28.4561	255.26
alos11414	ALPSMW090603035	2007-10-07	ALAV2A211383040	2010-01-12	0.28986	0	5992	5436	5724.3	5733	Dangme	33.3304	37.6324	29.0466	329.844
alos11415	ALPSMW090603035	2007-10-07	ALAV2A211383040	2010-01-12	0.39082	0	5673	5267	5473.55	5463	Dangme	23.0665	27.8558	17.8559	336.732
alos11416	ALPSMW090603035	2007-10-07	ALAV2A211383040	2010-01-12	0.417188	0	6089	5393	5749.27	5751	Dangme	29.1763	27.7695	29.1737	70.6669
alos11417	ALPSMW090603035	2007-10-07	ALAV2A211383040	2010-01-12	0.330216	0	5990	5451	5694.98	5679	Dangme	30.081	31.9645	27.5753	22.1787
alos11418	ALPSMW090603035	2007-10-07	ALAV2A211383040	2010-01-12	0.798476	0.137301	6020	5300	5607.96	5611	Dangme	21.6882	25.7704	17.4876	61.7018
alos11419	ALPSMW090603035	2007-10-07	ALAV2A211383040	2010-01-12	2.17251	0.228539	6073	5217	5651.85	5669	Dangme	21.6526	25.9903	16.7993	22.9835
alos11420	ALPSMN211383035	2010-01-12	ALAV2A211383040	2010-01-12	3.65446	1.26455	6285	4471	5269.35	5229	Dangme	27.1406	36.2955	17.6099	166.492
alos11421	ALPSMW090603035	2007-10-07	ALAV2A211383040	2010-01-12	0.0327758	0	5756	5598	5675.15	5664	Dangme	36.1004	37.4805	30.2823	42.5587
alos11422	ALPSMW090603035	2007-10-07	ALAV2A211383040	2010-01-12	2.00604	0.910695	6210	4960	5313.27	5313	Dangme	17.2022	18.2718	14.5615	23.336
alos11423	ALPSMW090603035	2007-10-07	ALAV2A211383040	2010-01-12	2.14715	0	6052	5278	5632.56	5650	Dangme	16.562	18.9875	14.0887	30.9336
alos11424	ALPSMN211383035	2010-01-12	ALAV2A211383040	2010-01-12	2.54198	1.3082	6281	4666	5110.8	4984	Dangme	19.9654	26.8631	12.5765	50.998
alos11425	ALPSMN211383035	2010-01-12	ALAV2A211383040	2010-01-12	0.116023	0	5390	5141	5252.59	5252	Dangme	30.449	29.1924	31.7219	127.823
alos11426	ALPSMN211383035	2010-01-12	ALAV2A211383040	2010-01-12	2.27237	0.32696	5512	4742	5136.52	5149	Dangme	19.8901	22.7252	17.4412	93.6268
alos11427	ALPSMN211383035	2010-01-12	ALAV2A211383040	2010-01-12	0.132434	0	5072	4836	4945.46	4934	Dangme	29.7304	38.7056	20.1515	22.0634
alos11428	ALPSMW090603035	2007-10-07	ALAV2A211383040	2010-01-12	0.811258	0	5820	5272	5532.12	5534	Dangme	19.3591	20.6336	18.1869	31.5928
alos11429	ALPSMN211383035	2010-01-12	ALAV2A211383040	2010-01-12	0.270515	0	5299	5020	5140.94	5137	Dangme	21.7457	19.3801	22.1168	55.3106
alos11430	ALPSMN211383035	2010-01-12	ALAV2A211383040	2010-01-12	0.641388	0	5432	5094	5243.82	5241	Dangme	19.9615	21.7455	18.6745	177.046
alos11431	ALPSMN211383035	2010-01-12	ALAV2A211383040	2010-01-12	0.0288477	0	5665	5526	5604.44	5603	Dangme	31.5999	29.588	28.7471	340.351
alos11432	ALPSMN211383040	2010-01-12	ALAV2A211383040	2010-01-12	0.0652535	0	5092	4954	5044.89	5056	Dangme	26.6608	17.1046	32.8693	347.617
alos11433	ALPSMN211383035	2010-01-12	ALAV2A211383040	2010-01-12	0.0230627	0	5678	5498	5587.52	5594	Dangme	36.1321	31.9689	35.8721	26.5488
alos11434	ALPSMN211383035	2010-01-12	ALAV2A211383040	2010-01-12	0.0144589	0	5277	5198	5235.6	5236	Dangme	37.2993	39.695	36.3027	182.818
alos11435	ALPSMN211383035	2010-01-12	ALAV2A211383040	2010-01-12	0.0651549	0	5665	5327	5489.41	5461	Dangme	33.7959	36.4943	33.8406	198.811
alos11436	ALPSMN211383040	2010-01-12	ALAV2A211383040	2010-01-12	0.0126393	0	5108	5052	5087.07	5093	Dangme	23.9082	19.3222	19.1985	24.8916
alos11437	ALPSMN211383035	2010-01-12	ALAV2A211383040	2010-01-12	0.189115	0	5748	5085	5379.58	5354	Dangme	36.1317	40.284	32.821	205.493
alos11438	ALPSMN211383035	2010-01-12	ALAV2A211383040	2010-01-12	0.166251	0	5777	5316	5579.5	5601	Dangme	33.4579	31.9858	34.7761	354.014
alos11439	ALPSMN211383040	2010-01-12	ALAV2A211383040	2010-01-12	0.032281	0	5105	4873	5010.72	5013	Dangme	39.4643	38.0666	39.8025	325.777
alos11440	ALPSMN211383040	2010-01-12	ALAV2A211383040	2010-01-12	0.0360244	0	5148	4956	5045.33	5041	Dangme	39.726	43.6119	26.7579	299.321
alos11441	ALPSMN211383035	2010-01-12	ALAV2A211383040	2010-01-12	0.359165	0	5858	5080	5397.85	5322	Dangme	31.6034	33.9233	30.1708	207.966
alos11442	ALPSMN211383035	2010-01-12	ALAV2A211383040	2010-01-12	0.359174	0	5488	4949	5217.6	5220	Dangme	29.4632	31.3561	27.1981	225.166
alos11443	ALPSMN211383035	2010-01-12	ALAV2A211383040	2010-01-12	3.18161	0.631732	6083	4840	5384.02	5396	Dangme	21.3962	26.0947	15.5997	357.176
alos11444	ALPSMN211383035	2010-01-12	ALAV2A211383040	2010-01-12	0.216135	0	5940	5453	5753.74	5775	Dangme	31.5102	31.2242	32.4858	283.931
alos11445	ALPSMN211383040	2010-01-12	ALAV2A211383040	2010-01-12	0.471321	0	5224	4885	5061.62	5064	Dangme	19.6595	20.8072	18.3289	341.579
alos11446	ALPSMN211383040	2010-01-12	ALAV2A211383040	2010-01-12	0.0668184	0	5509	5143	5334.44	5326	Dangme	37.0872	37.7829	40.1925	349.414
alos11447	ALPSMN211383035	2010-01-12	ALAV2A211383040	2010-01-12	0.392821	0	5864	5317	5596.05	5601	Dangme	31.9433	33.8044	28.2616	16.3074
alos11448	ALPSMN211383035	2010-01-12	ALAV2A211383040	2010-01-12	0.131264	0	5414	5122	5275.3	5293	Dangme	24.4956	22.6091	24.317	249.528
alos11449	ALPSMN211383035	2010-01-12	ALAV2A211383040	2010-01-12	0.274843	0	5467	5019	5223.44	5225	Dangme	25.9471	26.1437	24.9805	267.057
alos11450	ALPSMN211383035	2010-01-12	ALAV2A211383040	2010-01-12	0.109596	0	5623	4968	5296.33	5283	Dangme	27.9736	30.1509	24.5796	279.397
alos11451	ALPSMN211383035	2010-01-12	ALAV2A211383040	2010-01-12	0.421477	0	5635	5014	5296.19	5309	Dangme	24.3801	25.5838	22.1813	273.801
alos11452	ALPSMN211383040	2010-01-12	ALAV2A211383040	2010-01-12	0.0878871	0	5086	4975	5048.24	5052	Dangme	19.5114	13.958	23.2163	323.9
alos11453	ALPSMN211383035	2010-01-12	ALAV2A211383040	2010-01-12	0.0983863	0	5364	5030	5223.81	5225	Dangme	26.7487	25.3231	27.314	259.882
alos11454	ALPSMN211383035	2010-01-12	ALAV2A211383040	2010-01-12	0.493542	0	5838	5449	5665.07	5677	Dangme	23.781	24.4313	24.2811	240.867
alos11455	ALPSMN211383035	2010-01-12	ALAV2A211383040	2010-01-12	0.300352	0	5927	5351	5662.3	5683	Dangme	27.1565	28.4033	25.2164	63.1518
alos11456	ALPSMN211383035	2010-01-12	ALAV2A211383040	2010-01-12	0.0829092	0	5638	5341	5483.55	5494	Dangme	32.1895	30.2051	35.776	357.396
alos11457	ALPSMN211383040	2010-01-12	ALAV2A211383040	2010-01-12	0.0297581	0	5168	5061	5123.33	5122	Dangme	28.6837	21.836	33.5115	22.1117
alos11458	ALPSMN211383040	2010-01-12	ALAV2A211383040	2010-01-12	0.166423	0	5313	5046	5150.05	5144	Dangme	26.3594	24.8821	27.4034	288.016
alos11459	ALPSMN211383035	2010-01-12	ALAV2A211383040	2010-01-12	0.0994608	0	5586	5302	5446.07	5447	Dangme	29.0927	31.2134	26.5054	19.0655
alos11460	ALPSMN211383035	2010-01-12	ALAV2A211383040	2010-01-12	0.126526	0	5789	5508	5678.33	5685	Dangme	25.5407	19.8686	28.7819	87.4141
alos11461	ALPSMN211383035	2010-01-12	ALAV2A211383040	2010-01-12	0.0558405	0	5789	5333	5526.23	5506	Dangme	47.1952	55.422	38.3411	182.282
alos11462	ALPSMN211383035	2010-01-12	ALAV2A211383040	2010-01-12	0.130725	0	5590	5345	5490.03	5501	Dangme	20.4332	21.1776	19.9764	73.2187
alos11463	ALPSMN211383035	2010-01-12	ALAV2A211383040	2010-01-12	0.0736231	0	5815	5499	5708.63	5723	Dangme	31.4584	30.1532	38.0947	292.532
alos11464	ALPSMN211383040	2010-01-12	ALAV2A211383040	2010-01-12	0.0910753	0	5333	5082	5200.79	5203	Dangme	35.9882	36.694	35.6555	334.713
alos11465	ALPSMN211383035	2010-01-12	ALAV2A211383040	2010-01-12	0.200495	0	5678	5270	5452.76	5449	Dangme	27.0083	33.3128	21.5704	59.5293
alos11466	ALPSMN211383035	2010-01-12	ALAV2A211383040	2010-01-12	0.097793	0	5589	5308	5449.19	5446	Dangme	30.7513	31.1749	28.2205	349.569
alos11467	ALPSMN211383040	2010-01-12	ALAV2A211383040	2010-01-12	0.0596167	0	5307	5184	5245.67	5246	Dangme	22.8361	20.1646	23.1782	95.1326
alos11468	ALPSMN211383040	2010-01-12	ALAV2A211383040	2010-01-12	0.170174	0	5084	4820	4935.4	4920	Dangme	31.6262	40.4822	22.2542	329.235
alos11469	ALPSMN211383035	2010-01-12	ALAV2A211383040	2010-01-12	3.64966	1.14887	6098	4785	5336.45	5373	Dangme	17.443	21.768	13.239	19.4791
alos11470	ALPSMN211383035	2010-01-12	ALAV2A211383040	2010-01-12	0.0972471	0	5585	5304	5446.84	5454	Dangme	26.3336	23.2753	27.4611	11.5203
alos11471	ALPSMN211383035	2010-01-12	ALAV2A211383040	2010-01-12	0.0965389	0	5790	5557	5685.79	5692	Dangme	28.4384	25.599	28.7969	150.149
alos11472	ALPSMN211383035	2010-01-12	ALAV2A211383040	2010-01-12	0.293148	0.0785429	5864	5046	5392.65	5325	Dangme	36.7143	43.8839	29.9504	174.671
alos11473	ALPSMN211383035	2010-01-12	ALAV2A211383040	2010-01-12	0.373677	0	5673	5209	5504.03	5522	Dangme	25.1906	20.9701	28.5223	0.531341
alos11474	ALPSMN211383035	2010-01-12	ALAV2A211383040	2010-01-12	0.0522541	0	5529	5342	5440.56	5439	Dangme	29.3064	30.2034	26.6638	40.2099
alos11475	ALPSMN211383035	2010-01-12	ALAV2A211383040	2010-01-12	0.688659	0	5779	5070	5535.35	5621	Dangme	21.6791	16.3323	26.7195	102.121
alos11476	ALPSMN211383035	2010-01-12	ALAV2A211383040	2010-01-12	0.128318	0	5890	5386	5702.01	5711	Dangme	33.6669	33.7234	33.5148	140.859
alos11477	ALPSMN211383035	2010-01-12	ALAV2A211383040	2010-01-12	3.92018	0	6007	4722	5362.55	5382	Dangme	21.3976	18.5364	24.3016	113.905
alos11478	ALPSMN211383035	2010-01-12	ALAV2A211383040	2010-01-12	0.666389	0	5764	4966	5457.24	5518	Dangme	20.4818	16.6213	24.3202	86.1299
alos11479	ALPSMN211383035	2010-01-12	ALAV2A211383040	2010-01-12	0.475632	0	5987	5197	5519.92	5381	Dangme	29.5373	35.2919	24.2713	14.0713
alos11480	ALPSMN211383035	2010-01-12	ALAV2A211383030	2010-01-12	0.0351474	0	5647	5595	5615.05	5610	Dangme	13.9664	14.6329	12.272	273.74
alos11481	ALPSMN211383035	2010-01-12	ALAV2A211383040	2010-01-12	2.2526	0	5819	4704	5302.41	5319	Dangme	28.9883	29.2232	29.0232	128.731
alos11482	ALPSMN211383040	2010-01-12	ALAV2A211383040	2010-01-12	0.0790454	0	5205	4995	5127.16	5138	Dangme	27.3643	24.2169	30.8215	334.834
alos11483	ALPSMN211383035	2010-01-12	ALAV2A211383030	2010-01-12	0.257131	0	5851	5463	5663.48	5649	Dangme	28.9506	35.0848	22.9196	329.811
alos11484	ALPSMN211383035	2010-01-12	ALAV2A211383030	2010-01-12	0.0248342	0	5604	5472	5537.13	5544	Dangme	22.1337	19.5067	24.597	63.0862
alos11485	ALPSMN211383035	2010-01-12	ALAV2A211383030	2010-01-12	0.20854	0	5680	5440	5562.13	5557	Dangme	19.6951	20.2725	17.307	19.0282
alos11486	ALPSMN211383040	2010-01-12	ALAV2A211383040	2010-01-12	0.145984	0	5314	5084	5191.7	5186	Dangme	26.8624	26.6902	28.6219	301.362
alos11487	ALPSMN211383035	2010-01-12	ALAV2A211383040	2010-01-12	0.0464787	0	5408	5253	5327.63	5324	Dangme	28.9323	27.5231	27.7694	43.955
alos11488	ALPSMN211383035	2010-01-12	ALAV2A211383030	2010-01-12	0.0198503	0	5641	5558	5600.33	5602	Dangme	24.9547	26.8568	24.1983	322.409
alos11489	ALPSMN211383035	2010-01-12	ALAV2A211383030	2010-01-12	0.032188	0	5704	5591	5643.66	5643	Dangme	29.8451	31.1221	32.8279	66.4963
alos11490	ALPSMN211383035	2010-01-12	ALAV2A211383040	2010-01-12	1.3755	0	5740	4764	5161.76	5129	Dangme	29.6975	30.9156	28.8388	1.33639
alos11491	ALPSMN211383040	2010-01-12	ALAV2A211383040	2010-01-12	0.428563	0	5314	5022	5179.55	5185	Dangme	23.7351	21.073	24.8427	66.3267
alos11492	ALPSMN211383035	2010-01-12	ALAV2A211383030	2010-01-12	0.096715	0	5607	5456	5526.19	5527	Dangme	23.8178	22.5612	24.3148	0.396958
alos11493	ALPSMN211383040	2010-01-12	ALAV2A211383040	2010-01-12	0.140506	0	5257	4966	5115.98	5117	Dangme	25.2951	25.2617	25.1185	283.264
alos11494	ALPSMN211383040	2010-01-12	ALAV2A211383040	2010-01-12	0.189992	0	5241	4966	5127.46	5135	Dangme	23.8342	20.0643	27.7667	55.6204
alos11495	ALPSMN211383040	2010-01-12	ALAV2A211383040	2010-01-12	0.437068	0	5344	4910	5134.96	5129	Dangme	23.1346	22.1005	23.2578	30.746
alos11496	ALPSMN211383040	2010-01-12	ALAV2A211383040	2010-01-12	0.327166	0	5281	4913	5093.63	5086	Dangme	24.9008	28.0569	22.1766	24.9751
alos11497	ALPSMN211383035	2010-01-12	ALAV2A211383040	2010-01-12	0.0527014	0	5283	5159	5226.52	5227	Dangme	25.9291	25.0877	28.5545	304.393
alos11498	ALPSMN211383035	2010-01-12	ALAV2A211383030	2010-01-12	0.0654376	0	5801	5384	5585.34	5600	Dangme	43.8399	40.9763	48.3935	2.4924
alos11499	ALPSMN211383035	2010-01-12	ALAV2A211383030	2010-01-12	0.0287763	0	5855	5774	5810.15	5809	Dangme	26.6224	17.7178	31.5215	349.924
alos11500	ALPSMN211383040	2010-01-12	ALAV2A211383040	2010-01-12	0.0144559	0	5225	5127	5169.61	5162	Dangme	36.0818	39.1001	34.2255	330.951
alos11501	ALPSMN211383035	2010-01-12	ALAV2A211383030	2010-01-12	0.110099	0	5561	5250	5401.58	5405	Dangme	31.5698	31.9586	31.5941	26.3317
alos11502	ALPSMN211383035	2010-01-12	ALAV2A211383040	2010-01-12	0.0154019	0	5176	5099	5140.29	5139	Dangme	26.8431	24.189	30.3009	9.63568
alos11503	ALPSMN211383040	2010-01-12	ALAV2A211383040	2010-01-12	0.140015	0	5337	5134	5254.25	5262	Dangme	32.053	29.4336	36.5154	328.02
alos11504	ALPSMN211383035	2010-01-12	ALAV2A211383030	2010-01-12	1.07533	0	6053	5179	5660.64	5684	Dangme	32.0272	36.2614	28.0863	292.609
alos11505	ALPSMN211383040	2010-01-12	ALAV2A211383040	2010-01-12	0.0345051	0	5256	5125	5210.08	5214	Dangme	27.2409	23.8692	33.4774	336.92
alos11506	ALPSMN211383035	2010-01-12	ALAV2A211383030	2010-01-12	0.135715	0	5912	5394	5621.52	5622	Dangme	27.4568	29.4786	27.5681	205.381
alos11507	ALPSMN211383040	2010-01-12	ALAV2A211383040	2010-01-12	0.0270757	0	4789	4661	4704.21	4692	Dangme	33.6821	47.4316	22.2845	13.5888
alos11508	ALPSMN211383035	2010-01-12	ALAV2A211383040	2010-01-12	0.138718	0	5419	5121	5284.21	5292	Dangme	34.705	30.3919	36.5074	349.41
alos11509	ALPSMN211383035	2010-01-12	ALAV2A211383040	2010-01-12	0.0684692	0	5527	5245	5420.64	5429	Dangme	36.9558	31.1468	43.0359	359.507
alos11510	ALPSMN211383035	2010-01-12	ALAV2A211383030	2010-01-12	0.455782	0	5705	5291	5535.15	5553	Dangme	28.6235	29.6799	28.478	311.58
alos11511	ALPSMN211383035	2010-01-12	ALAV2A211383030	2010-01-12	0.172969	0	5586	5200	5416.11	5436	Dangme	31.6045	30.7565	31.0367	9.96356
alos11512	ALPSMN211383035	2010-01-12	ALAV2A211383040	2010-01-12	0.0555459	0	5357	5179	5274.21	5270	Dangme	26.979	21.6088	28.9771	50.6973
alos11513	ALPSMN211383035	2010-01-12	ALAV2A211383030	2010-01-12	0.0449441	0	5565	5469	5518.92	5516	Dangme	21.7276	17.791	22.0893	84.3636
alos11514	ALPSMN211383035	2010-01-12	ALAV2A211383030	2010-01-12	0.0171107	0	5598	5474	5540.7	5543	Dangme	38.8697	37.1546	41.8227	20.4207
alos11515	ALPSMN211383035	2010-01-12	ALAV2A211383030	2010-01-12	0.0257321	0	5568	5438	5494.79	5486	Dangme	32.3795	35.864	32.3287	16.4492
alos11516	ALPSMN211383035	2010-01-12	ALAV2A211383040	2010-01-12	0.0398749	0	5466	5346	5413.4	5416	Dangme	30.0092	32.2598	32.7107	305.2
alos11517	ALPSMN211383035	2010-01-12	ALAV2A211383040	2010-01-12	0.0128212	0	5443	5381	5420.53	5423	Dangme	27.6529	15.0251	28.0642	64.8123
alos11518	ALPSMN211383035	2010-01-12	ALAV2A211383040	2010-01-12	0.0318889	0	5242	5165	5207.74	5211	Dangme	23.7611	21.9451	25.5459	8.23057
alos11519	ALPSMN211383035	2010-01-12	ALAV2A211383040	2010-01-12	0.01163	0	5362	5319	5344.33	5346	Dangme	20.978	14.3731	19.9608	42.5847
alos11520	ALPSMN211383035	2010-01-12	ALAV2A211383040	2010-01-12	0.037108	0	5302	5217	5251.73	5250	Dangme	14.8401	21.7653	10.6148	357.781
alos11521	ALPSMN211383035	2010-01-12	ALAV2A211383040	2010-01-12	0.0735871	0	5192	5062	5147.68	5157	Dangme	24.0644	20.5228	28.9514	6.11612
alos11522	ALPSMN211383035	2010-01-12	ALAV2A211383040	2010-01-12	0.0343794	0	5233	5158	5192.38	5190	Dangme	18.738	18.9632	17.9215	63.386
alos11523	ALPSMN211383035	2010-01-12	ALAV2A211383030	2010-01-12	0.0321502	0	5428	5300	5372.74	5380	Dangme	30.6378	24.9811	36.1042	15.1359
alos11524	ALPSMN211383035	2010-01-12	ALAV2A211383030	2010-01-12	0.0706785	0	5149	4963	5032.15	5022	Dangme	33.8332	36.4141	26.2678	346.511
alos11525	ALPSMN211383030	2010-01-12	ALAV2A211383030	2010-01-12	0.447312	0	6233	5369	5762.72	5746	Dangme	30.0979	31.753	28.0504	289.397
alos11526	ALPSMN211383035	2010-01-12	ALAV2A211383030	2010-01-12	0.0202657	0	5776	5713	5734.17	5725	Dangme	19.9324	28.9732	16.4685	324.052
alos11527	ALPSMN211383035	2010-01-12	ALAV2A211383030	2010-01-12	0.191242	0	5508	5040	5317.54	5328	Dangme	37.8368	35.8628	40.5368	326.906
alos11528	ALPSMN211383030	2010-01-12	ALAV2A211383030	2010-01-12	0.343577	0	5971	5562	5753.21	5749	Dangme	26.4298	26.8831	27.3089	249.842
alos11529	ALPSMN211383030	2010-01-12	ALAV2A211383030	2010-01-12	0.311038	0	6368	5443	5883.89	5866	Dangme	32.2742	29.4972	34.6562	304.563
alos11530	ALPSMN211383035	2010-01-12	ALAV2A211383030	2010-01-12	0.0453387	0	5951	5661	5831.3	5824	Dangme	32.1988	32.9283	38.0659	275.394
alos11531	ALPSMN211383035	2010-01-12	ALAV2A211383030	2010-01-12	0.433585	0	5863	5275	5628.89	5672	Dangme	25.1599	23.2109	28.0395	317.355
alos11532	ALPSMN211383030	2010-01-12	ALAV2A211383030	2010-01-12	0.160985	0	6109	5573	5779.72	5768	Dangme	33.2085	33.7954	33.3422	255.934
alos11533	ALPSMN211383035	2010-01-12	ALAV2A211383030	2010-01-12	0.160493	0	5520	5254	5400.94	5401	Dangme	28.8708	26.1659	28.6977	159.247
alos11534	ALPSMN211383035	2010-01-12	ALAV2A211383030	2010-01-12	1.14705	0	5864	5404	5636.73	5647	Dangme	23.2543	23.4638	22.2449	100.222
alos11535	ALPSMN211383030	2010-01-12	ALAV2A211383030	2010-01-12	0.0880972	0	6048	5553	5774.92	5760	Dangme	38.9179	42.3153	36.4324	315.166
alos11536	ALPSMN211383030	2010-01-12	ALAV2A211383030	2010-01-12	0.219816	0	6158	5645	5901.09	5884	Dangme	33.5508	32.9049	34.5153	301.151
alos11537	ALPSMN211383030	2010-01-12	ALAV2A211383030	2010-01-12	0.563854	0	6170	5516	5863.63	5873	Dangme	30.784	32.624	29.4647	239.37
alos11538	ALPSMN211383030	2010-01-12	ALAV2A211383030	2010-01-12	0.600811	0	6126	5535	5772.84	5753	Dangme	22.9468	26.0796	19.8257	258.329
alos11539	ALPSMN211383030	2010-01-12	ALAV2A211383030	2010-01-12	0.632111	0	6445	5488	5895.85	5850	Dangme	29.3026	32.5915	26.8421	271.278
alos11540	ALPSMN211383030	2010-01-12	ALAV2A211383030	2010-01-12	2.17417	0.0576974	6486	5378	5977.52	5998	Dangme	28.7149	32.264	25.5019	257.227
alos11541	ALPSMN211383030	2010-01-12	ALAV2A211383030	2010-01-12	0.232824	0	6112	5519	5847.4	5831	Dangme	29.4879	32.6038	27.9007	325.444
alos11542	ALPSMN211383035	2010-01-12	ALAV2A211383030	2010-01-12	0.081609	0	5895	5744	5846.94	5853	Dangme	23.6647	18.9732	25.5079	91.688
alos11543	ALPSMN211383030	2010-01-12	ALAV2A211383030	2010-01-12	1.19044	0	6218	5395	5905.99	5951	Dangme	26.3365	24.4747	29.4187	266.643
alos11544	ALPSMN211383035	2010-01-12	ALAV2A211383030	2010-01-12	0.114728	0	5468	5186	5306.82	5296	Dangme	27.1783	33.3717	21.8448	41.3036
alos11545	ALPSMN211383030	2010-01-12	ALAV2A211383030	2010-01-12	0.0891657	0	6001	5697	5844.57	5834	Dangme	26.1911	29.3595	25.9686	313.034
alos11546	ALPSMN211383035	2010-01-12	ALAV2A211383030	2010-01-12	0.292807	0	5846	5328	5574.61	5573	Dangme	24.6793	25.7751	24.3278	346.466
alos11547	ALPSMN211383030	2010-01-12	ALAV2A211383030	2010-01-12	1.50349	0.113893	6416	5386	5841.51	5828	Dangme	31.3469	35.7859	26.6696	272.684
alos11548	ALPSMN211383030	2010-01-12	ALAV2A211383030	2010-01-12	0.0148251	0	5648	5585	5618.71	5614	Dangme	20.162	15.0189	24.193	23.0409
alos11549	ALPSMN211383030	2010-01-12	ALAV2A211383030	2010-01-12	0.183552	0	5961	5543	5755.23	5759	Dangme	32.3254	28.499	37.1201	13.082
alos11550	ALPSMN211383030	2010-01-12	ALAV2A211383030	2010-01-12	3.51681	0.0778103	6483	5235	5955.06	6006	Dangme	25.344	25.8506	25.0045	311.435
alos11551	ALPSMN211383035	2010-01-12	ALAV2A211383030	2010-01-12	0.0679215	0	5783	5608	5693.79	5694	Dangme	24.9789	22.4716	25.7295	83.7802
alos11552	ALPSMN211383030	2010-01-12	ALAV2A211383030	2010-01-12	1.8588	0.492147	6470	5231	5833.21	5848	Dangme	26.5009	34.2632	19.6377	270.451
alos11553	ALPSMN211383035	2010-01-12	ALAV2A211383030	2010-01-12	0.042969	0	5420	5320	5368.62	5368	Dangme	22.8232	20.0805	24.4151	104.307
alos11554	ALPSMN211383030	2010-01-12	ALAV2A211383030	2010-01-12	1.38722	0	6171	5437	5818.93	5814	Dangme	20.7745	22.6017	19.4128	357.163
alos11555	ALPSMN211383030	2010-01-12	ALAV2A211383030	2010-01-12	0.361717	0	5793	5540	5675.84	5685	Dangme	23.1248	22.0896	24.7638	303.897
alos11556	ALPSMN211383030	2010-01-12	ALAV2A211383030	2010-01-12	0.102754	0	5753	5556	5651.68	5642	Dangme	22.0955	24.8528	19.1966	33.6252
alos11557	ALPSMN211383030	2010-01-12	ALAV2A211383030	2010-01-12	0.170202	0	5939	5642	5778.15	5764	Dangme	26.4658	30.0184	23.5843	274.389
alos11558	ALPSMN211383035	2010-01-12	ALAV2A211383030	2010-01-12	0.0308572	0	5818	5654	5773.97	5792	Dangme	36.5677	35.764	50.1964	291.936
alos11559	ALPSMN211383030	2010-01-12	ALAV2A211383030	2010-01-12	0.0668168	0	5712	5605	5678.32	5692	Dangme	17.6425	10.6554	21.992	36.0573
alos11560	ALPSMN211383030	2010-01-12	ALAV2A211383030	2010-01-12	0.0830452	0	5906	5747	5821.98	5818	Dangme	19.3151	17.0952	21.2798	314.032
alos11561	ALPSMN211383030	2010-01-12	ALAV2A211383030	2010-01-12	0.111174	0	5841	5638	5725.46	5728	Dangme	24.8031	23.0392	24.9598	50.9023
alos11562	ALPSMN211383035	2010-01-12	ALAV2A211383030	2010-01-12	0.0373165	0	5674	5545	5606.02	5606	Dangme	22.6516	23.8672	26.2152	348.014
alos11563	ALPSMN211383030	2010-01-12	ALAV2A211383030	2010-01-12	1.54011	0	6203	5406	5748.79	5727	Dangme	20.8215	20.9902	20.402	152.714
alos11564	ALPSMN211383030	2010-01-12	ALAV2A211383030	2010-01-12	0.10778	0	5862	5662	5761.31	5760	Dangme	30.6989	23.957	33.0145	61.7584
alos11565	ALPSMN211383030	2010-01-12	ALAV2A211383030	2010-01-12	0.241698	0	6217	5566	5975.8	6026	Dangme	29.8221	23.8374	33.3312	60.5224
alos11566	ALPSMN211383030	2010-01-12	ALAV2A211383030	2010-01-12	1.45643	0	6221	5410	5816.83	5746	Dangme	22.0324	24.5726	18.0754	80.1801
alos11567	ALPSMN211383030	2010-01-12	ALAV2A211383030	2010-01-12	0.146364	0	5722	5550	5660.08	5676	Dangme	15.3057	9.0644	18.7482	67.9378
alos11568	ALPSMN211383030	2010-01-12	ALAV2A211383030	2010-01-12	0.410703	0	5998	5568	5810.29	5824	Dangme	25.8894	27.6102	22.5916	209.875
alos11569	ALPSMN211383035	2010-01-12	ALAV2A211383030	2010-01-12	0.167533	0	5661	5466	5581.18	5592	Dangme	22.7523	18.0525	25.2545	44.4121
alos11570	ALPSMN211383030	2010-01-12	ALAV2A211383030	2010-01-12	0.0588523	0	5871	5773	5833.39	5838	Dangme	19.663	14.8189	20.8895	86.8571
alos11571	ALPSMN211383030	2010-01-12	ALAV2A211383030	2010-01-12	0.791091	0	6000	5381	5664.81	5656	Dangme	23.153	24.6711	21.28	4.62556
alos11572	ALPSMN211383030	2010-01-12	ALAV2A211383030	2010-01-12	1.07243	0.0591773	6159	5280	5809.37	5873	Dangme	23.0981	21.3012	24.1207	136.196
alos11573	ALPSMN211383030	2010-01-12	ALAV2A211383030	2010-01-12	1.08909	0	6407	5320	5894.82	5961	Dangme	26.4656	26.2809	25.7495	106.668
alos11574	ALPSMN211383030	2010-01-12	ALAV2A211383030	2010-01-12	0.931765	0.038652	6262	5444	5851.24	5873	Dangme	26.1374	26.1786	25.0642	58.0281
alos11575	ALPSMN211383030	2010-01-12	ALAV2A211383030	2010-01-12	0.744431	0	6293	5381	5953.9	6005	Dangme	28.8064	23.9618	32.744	129.887
alos11576	ALPSMN211383030	2010-01-12	ALAV2A211383030	2010-01-12	0.588373	0	6373	5475	5941.39	5980	Dangme	29.8841	30.2404	28.6217	66.3154
alos11577	ALPSMN211383030	2010-01-12	ALAV2A211383030	2010-01-12	3.22395	1.23245	6487	5090	5720.01	5638	Dangme	23.7124	29.8924	17.1697	92.1604
alos11578	ALPSMN211383030	2010-01-12	ALAV2A211383030	2010-01-12	0.285704	0	5801	5428	5672.23	5684	Dangme	25.6122	19.2188	28.7543	73.4094
alos11579	ALPSMN211383030	2010-01-12	ALAV2A211383030	2010-01-12	0.199299	0	5714	5486	5616.34	5618	Dangme	24.0766	20.6434	27.1201	7.56724
alos11580	ALPSMN211383030	2010-01-12	ALAV2A211383030	2010-01-12	0.0413329	0	5691	5514	5615.98	5623	Subansiri	30.5578	29.2659	33.1857	6.40664
alos11581	ALPSMN211383030	2010-01-12	ALAV2A211383030	2010-01-12	0.608192	0.383184	6469	5283	5589.27	5496	Dangme	22.5414	30.7746	14.5192	96.9327
alos11582	ALPSMN211383030	2010-01-12	ALAV2A211383030	2010-01-12	0.0102306	0	5464	5431	5448.09	5448	Dangme	19.7351	14.5982	22.6536	15.738
alos11583	ALPSMN260833035	2010-12-17	ALAV2A211383040	2010-01-12	0.304307	0	5624	5138	5323.64	5323	Kuri	20.5261	23.3727	17.4566	56.2149
