# Supplementary material for: Comparison of multiple glacier inventories with a new inventory derived from high-resolution ALOS imagery in the Bhutan Himalaya
Source: Copernicus journal article supplement (doi:10.5194/tc-10-65-2016), 2016-01-18
Supplement: Supplementary file 1 [file tc-10-65-2016-supplement.zip]

## **Supplementary materials**

**Table S1.** Scene ID and acquisition date of ALOS PRISM data used in this study.

| <b>Scene ID</b> | <b>Acquisition date</b> |
|-----------------|-------------------------|
| ALPSMN051073030 | 9 January 2007          |
| ALPSMN051073035 | 9 January 2007          |
| ALPSMN051073040 | 9 January 2007          |
| ALPSMN093083030 | 24 October 2007         |
| ALPSMN104753030 | 12 January 2008         |
| ALPSMN104753035 | 12 January 2008         |
| ALPSMN104753040 | 12 January 2008         |
| ALPSMN104753045 | 12 January 2008         |
| ALPSMN124883030 | 29 May 2008             |
| ALPSMN207883030 | 19 December 2009        |
| ALPSMN207883035 | 19 December 2009        |
| ALPSMN207883040 | 19 December 2009        |
| ALPSMN207883045 | 19 December 2009        |
| ALPSMN211383030 | 12 January 2010         |
| ALPSMN211383035 | 12 January 2010         |
| ALPSMN211383040 | 12 January 2010         |
| ALPSMN212113030 | 17 January 2010         |
| ALPSMN212113035 | 17 January 2010         |
| ALPSMN212113040 | 17 January 2010         |
| ALPSMN213863030 | 29 January 2010         |
| ALPSMN213863035 | 29 January 2010         |
| ALPSMN213863040 | 29 January 2010         |
| ALPSMN221303030 | 21 March 2010           |
| ALPSMN221303035 | 21 March 2010           |
| ALPSMN221303040 | 21 March 2010           |
| ALPSMN221303045 | 21 March 2010           |
| ALPSMN223053030 | 2 April 2010            |
| ALPSMN223053035 | 2 April 2010            |
| ALPSMN229763030 | 18 May 2010             |
| ALPSMN229763035 | 18 May 2010             |
| ALPSMN229763040 | 18 May 2010             |
| ALPSMN254853040 | 6 November 2010         |

|                 |                  |
|-----------------|------------------|
| ALPSMN254853045 | 6 November 2010  |
| ALPSMN259083030 | 5 December 2010  |
| ALPSMN259083035 | 5 December 2010  |
| ALPSMN259083040 | 5 December 2010  |
| ALPSMN259083045 | 5 December 2010  |
| ALPSMN260833030 | 17 December 2010 |
| ALPSMN260833035 | 17 December 2010 |
| ALPSMN260833040 | 17 December 2010 |
| ALPSMN261563030 | 22 December 2010 |
| ALPSMN261563035 | 22 December 2010 |
| ALPSMN261563040 | 22 December 2010 |
| ALPSMN261563045 | 22 December 2010 |
| ALPSMN263313030 | 3 January 2011   |
| ALPSMN263313035 | 3 January 2011   |
| ALPSMN263313040 | 3 January 2011   |
| ALPSMN265793030 | 20 January 2011  |
| ALPSMN265793035 | 20 January 2011  |
| ALPSMN265793040 | 20 January 2011  |
| ALPSMN267543030 | 1 February 2011  |
| ALPSMN267543035 | 1 February 2011  |
| ALPSMN267543040 | 1 February 2011  |
| ALPSMN271773035 | 2 March 2011     |
| ALPSMN271773040 | 2 March 2011     |
| ALPSMN272503030 | 7 March 2011     |
| ALPSMN272503035 | 7 March 2011     |
| ALPSMN272503040 | 7 March 2011     |

---

**Table S2.** Scene ID and acquisition date of ALOS AVNIR-2 data used in this study.

| <b>Scene ID</b> | <b>Acquisition date</b> |
|-----------------|-------------------------|
| ALAV2A051073030 | 9 January 2007          |
| ALAV2A053553030 | 26 January 2007         |
| ALAV2A053553050 | 26 January 2007         |
| ALAV2A093083030 | 24 October 2007         |
| ALAV2A102273030 | 26 December 2007        |
| ALAV2A102273040 | 26 December 2007        |
| ALAV2A200443040 | 29 October 2009         |
| ALAV2A207883030 | 19 December 2009        |
| ALAV2A207883040 | 19 December 2009        |
| ALAV2A207883050 | 19 December 2009        |
| ALAV2A211383030 | 12 January 2010         |
| ALAV2A211383040 | 12 January 2010         |
| ALAV2A212113030 | 17 January 2010         |
| ALAV2A212113040 | 17 January 2010         |
| ALAV2A221303030 | 21 March 2010           |
| ALAV2A221303040 | 21 March 2010           |
| ALAV2A221303050 | 21 March 2010           |
| ALAV2A254853030 | 6 November 2010         |
| ALAV2A254853040 | 6 November 2010         |
| ALAV2A254853050 | 6 November 2010         |
| ALAV2A259083030 | 5 December 2010         |
| ALAV2A259083040 | 5 December 2010         |
| ALAV2A260833030 | 17 December 2010        |
| ALAV2A260833040 | 17 December 2010        |
| ALAV2A261563030 | 22 December 2010        |
| ALAV2A261563040 | 22 December 2010        |
| ALAV2A263313030 | 3 January 2011          |
| ALAV2A263313040 | 3 January 2011          |

The ALOS-derived glacier outlines generated for this study were corrected four times prior to finalisation (e.g., Fig. S1) in order to assess the manual editing of the glacier shapes. As a consequence, the total number of delineated outlines changed from 1406 to 1583. We calculated the overlap ratios ( $r_{ov}$ ) of each version (V1 to V4) against the finalised version (V5) (Fig. S2). Toward finalisation, the mean overlap ratio ( $R_{V5}^{Vn}$ , where  $Vn$  denotes different versions from V1 to V4) increased from 0.65 to 0.97, implying that more outlines had well-overlapping shapes against V5. The numbers of non-overlapping outlines decreased from 351 (V1) to 42 (V4), whereas those with the same shape ( $r_{ov} = 1$ ) as the finalized version increased from 7 (V1) to 1539 (V4).

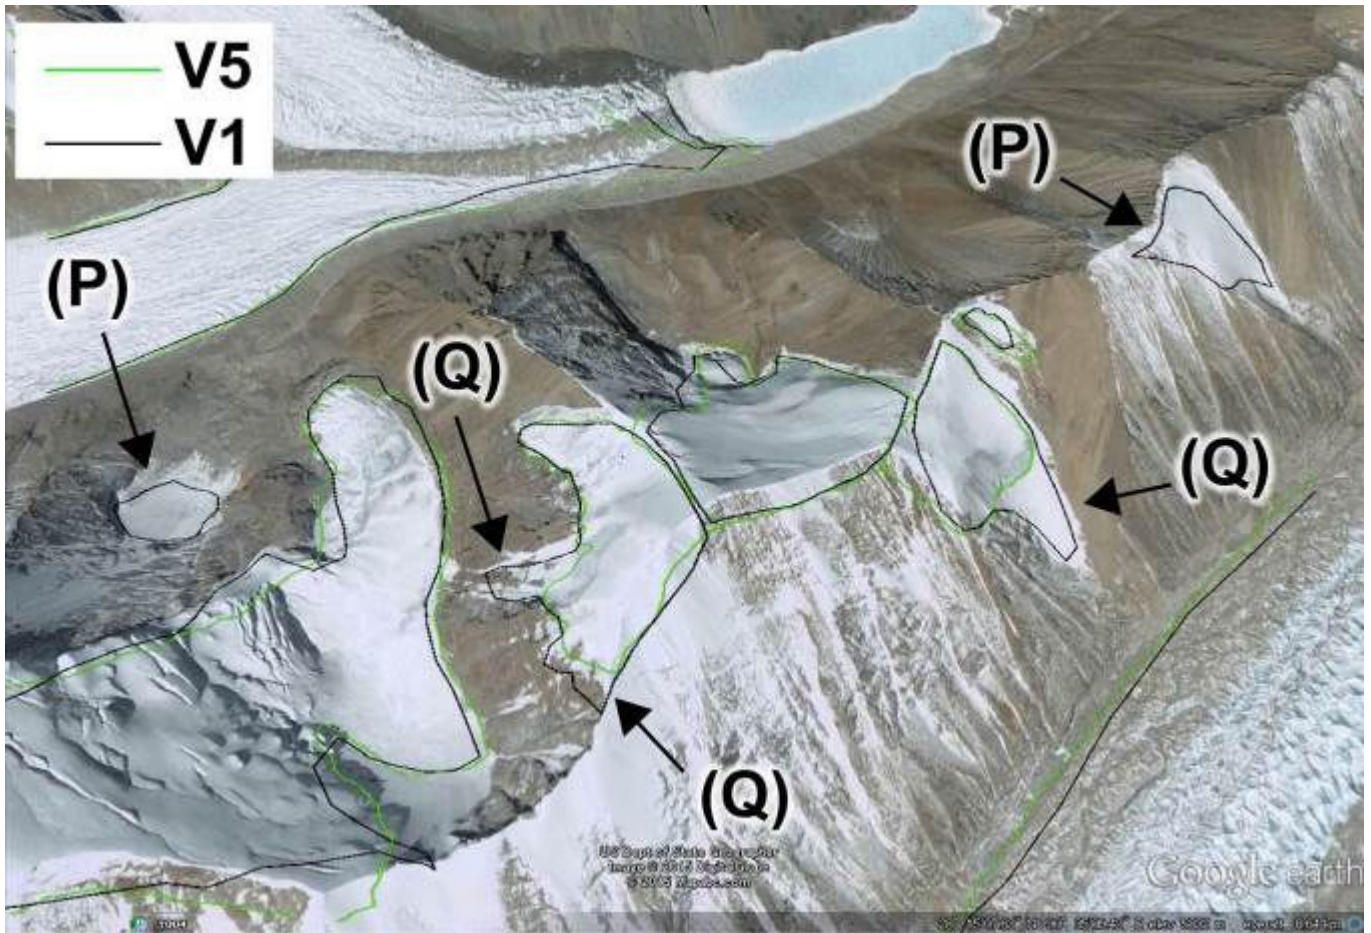

**Figure S1.** Pre-revised (V1) and finalised (V5) glacier outlines on a Google Earth image in part of our study site. (P) Misidentified glaciers were removed and (Q) excess outlines were corrected.

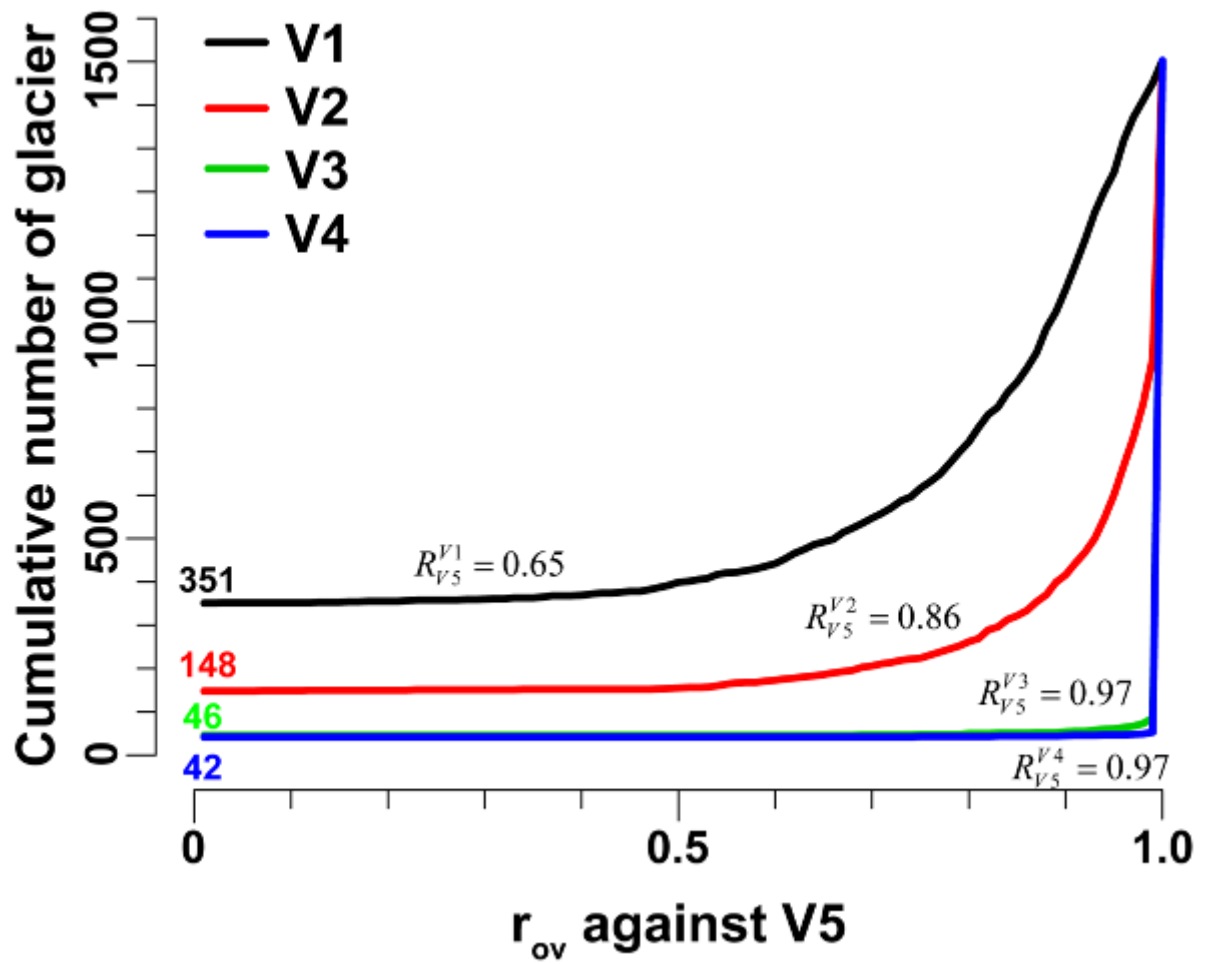

**Figure S2.** Cumulative number of glaciers against the overlap ratio ( $r_{ov}$ ) of pre-revised ALOS glacier inventories (V1 to V4), relative to the finalised version (V5). Numbers of non-overlapping glaciers ( $r_{ov} = 0$ ) are shown on the left.

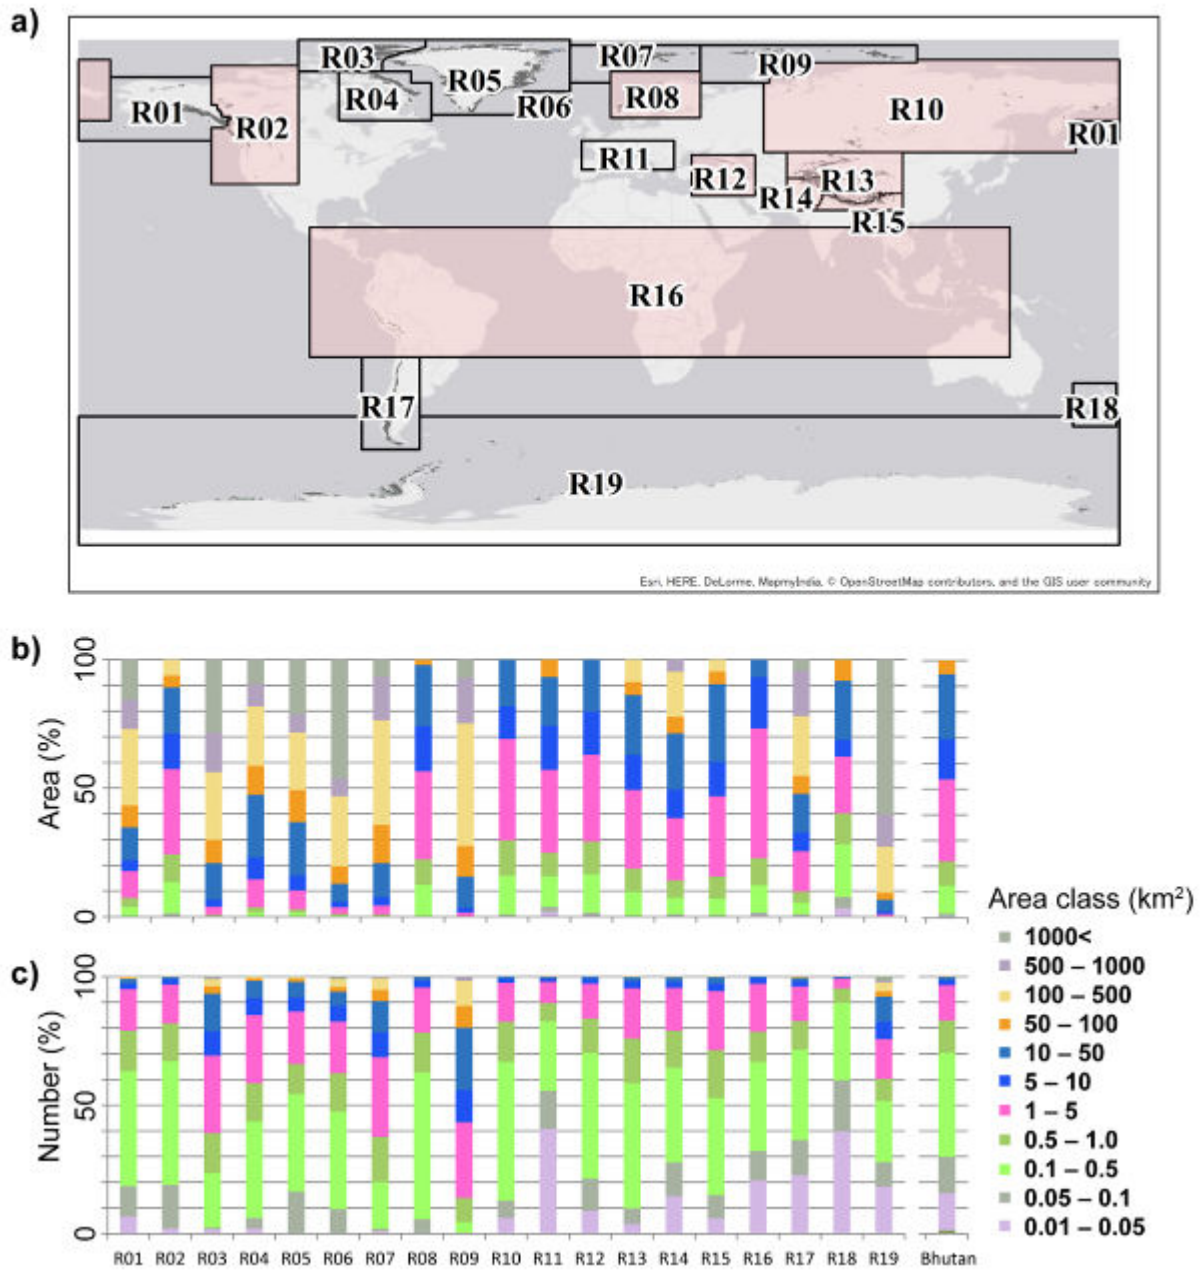

**Figure S3.** Glacier area statistics for 19 regions in the Randolph inventory. (a) Area distribution and (b) number distribution are categorised into 11 classes. (c) Coloured regions exhibit similar class distributions of glacier area and number as those in the Bhutan Himalaya.
