# Supplementary material for: Comparison of multiple glacier inventories with a new inventory derived from high-resolution ALOS imagery in the Bhutan Himalaya
Source: Copernicus journal article supplement (doi:10.5194/tc-10-65-2016), 2016-01-18
Supplement: Supplementary file 2 [file tc-10-65-2016-supplement.zip]

Archive with 4 entries (3 files):
- tc-10-65-2016-supplement-title-page.pdf
- sup/
- sup/sup2.xlsx
- sup/sup1.pdf
