# Supplementary material for: Comparison of multiple glacier inventories with a new inventory derived from high-resolution ALOS imagery in the Bhutan Himalaya
Source: Copernicus journal article supplement (doi:10.5194/tc-10-65-2016), 2016-01-18
Supplement: Supplementary file 2 [file tc-10-65-2016-supplement.zip › tc-10-65-2016-supplement-title-page.pdf]

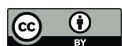

## *Supplement of*

# **Comparison of multiple glacier inventories with a new inventory derived from high-resolution ALOS imagery in the Bhutan Himalaya**

**H. Nagai et al.**

*Correspondence to:* H. Nagai ([nagai.hiroto@jaxa.jp](mailto:nagai.hiroto@jaxa.jp))

- [tc-10-65-2016-supplement-title-page.pdf](#)
- [sup](#)
  - [sup1.pdf](#)
  - [sup2.xlsx](#)

The copyright of individual parts of the supplement might differ from the CC-BY 3.0 licence.
